# Supplementary material
Source: PubMed Central journal article supplement (PMC6954317)
Supplement: NIHMS1065234-supplement-supplemental.pdf [file NIHMS1065234-supplement-supplemental.pdf]

# Supporting Information

For

## Design of new quinolin-2-one-pyrimidine hybrids as sphingosine kinases inhibitors

*Marcela Vettorazzi<sup>a</sup>, Daniel Insuasty<sup>b,c</sup>, Santiago Lima<sup>d</sup>, Lucas Gutiérrez<sup>a</sup>, Manuel Nogueras<sup>c</sup>, Antonio Marchal<sup>c</sup>, Rodrigo Abonia<sup>e</sup>, Sebastián Andújar<sup>a</sup>, Sarah Spiegel<sup>d</sup>, Justo Cobo<sup>c\*</sup> and Ricardo D. Enriz<sup>a\*</sup>*

<sup>a</sup>*Facultad de Química, Bioquímica y Farmacia, Universidad Nacional de San Luis; Instituto Multidisciplinario de Investigaciones Biológicas (IMIBIO-SL). Ejercito de los Andes 950, 5700 San Luis, Argentina; e-mail: denriz@unsl.edu.ar*

<sup>b</sup>*Departamento de Química y Biología, Universidad del Norte, Km 5 vía Puerto Colombia, Barranquilla 081007, Colombia.*

<sup>c</sup>*Inorganic and Organic Department, University of Jaén, Campus Las Lagunillas s/n, 23071, Jaén, Spain.*

<sup>d</sup>*Department of Biochemistry and Molecular Biology, Virginia Commonwealth University School of Medicine, Richmond, VA 23298 USA.*

<sup>e</sup>*Research Group of Heterocyclic Compounds, Department of Chemistry, Universidad del Valle, A. A. 25360, Cali, Colombia..*

## Table of Contents

Copies of  $^1\text{H}$  and  $^{13}\text{C}$  NMR spectra for (S3-S35)  
compounds **3a-19b**

Copies of MS and HRMS spectra for compounds (S36-S67)  
**3a-19**

**Compound-3a**

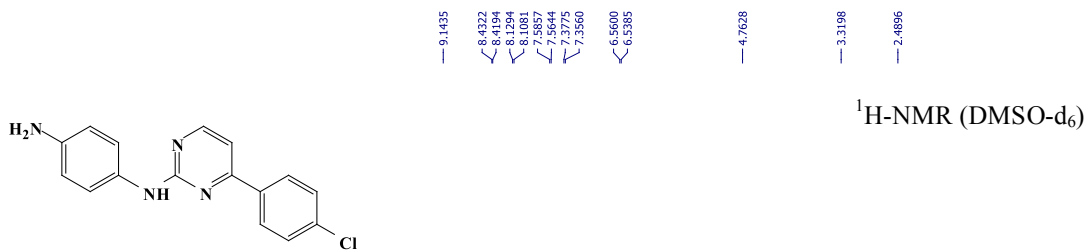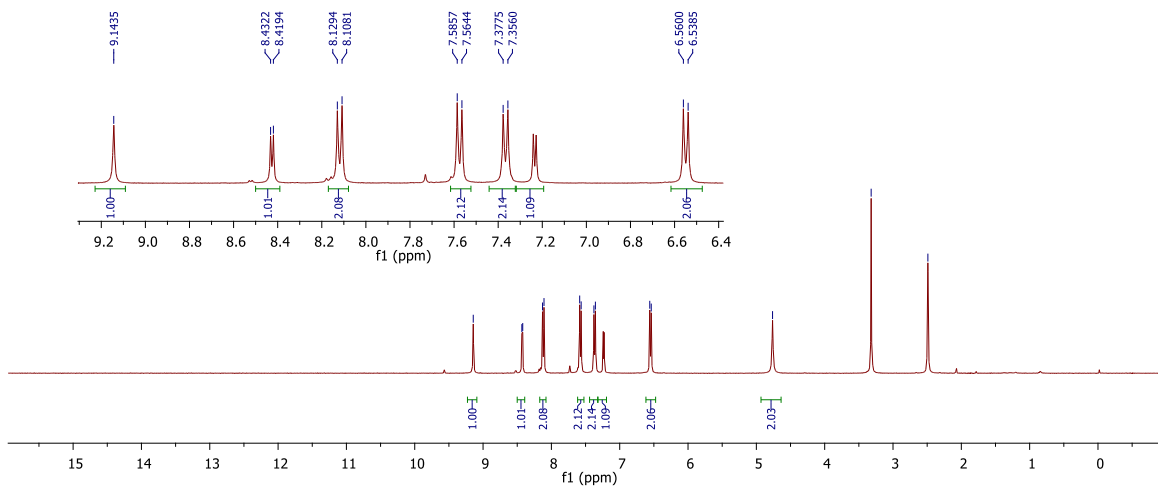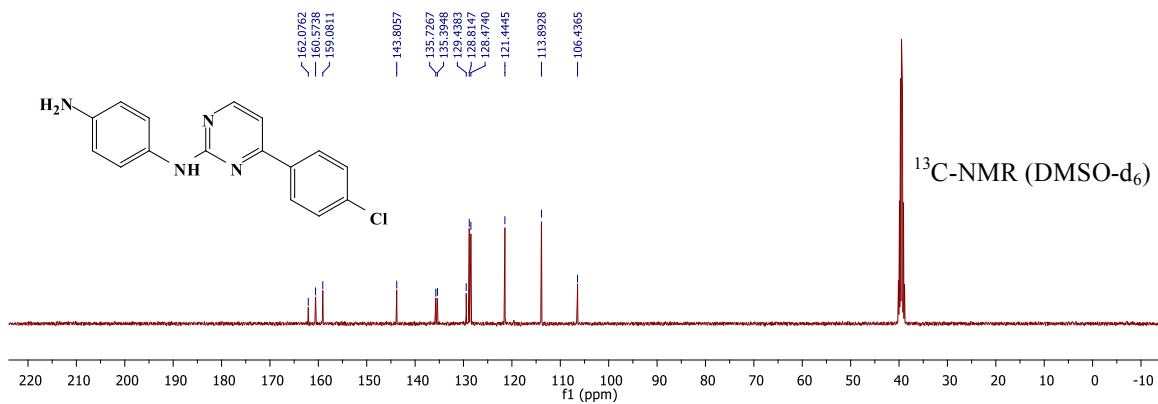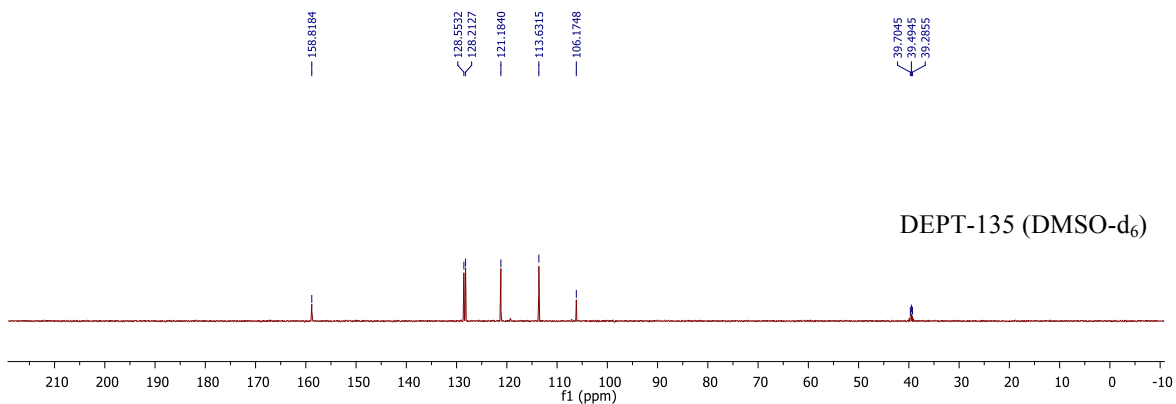

**Compound-3b**

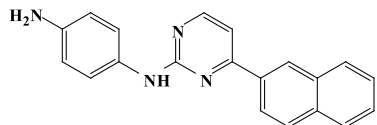

<sup>1</sup>H-NMR (DMSO-d<sub>6</sub>)

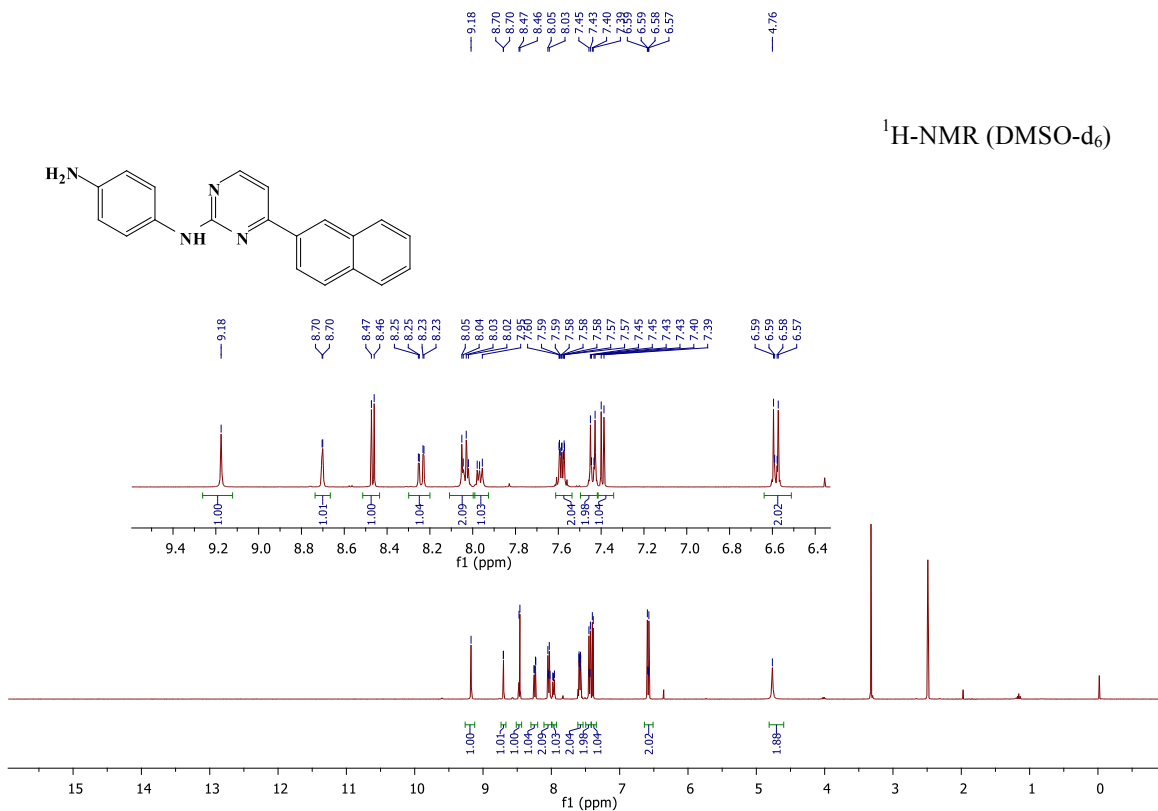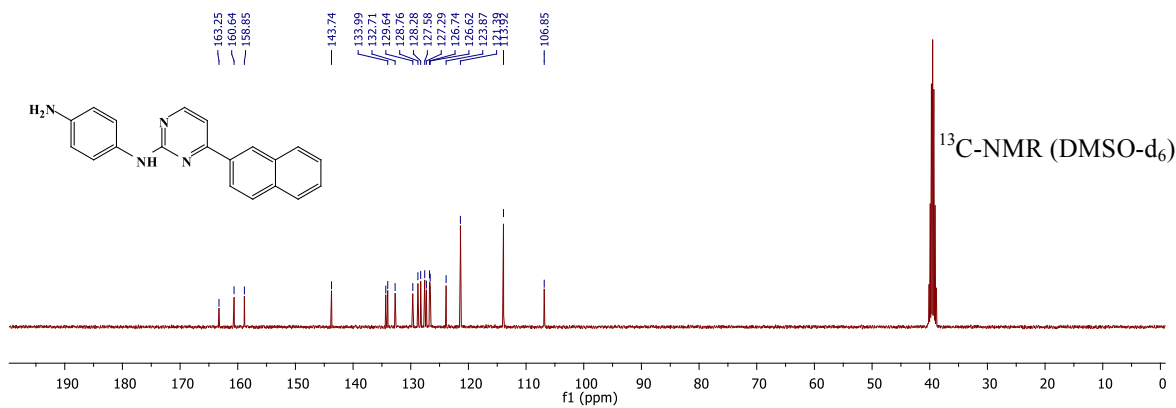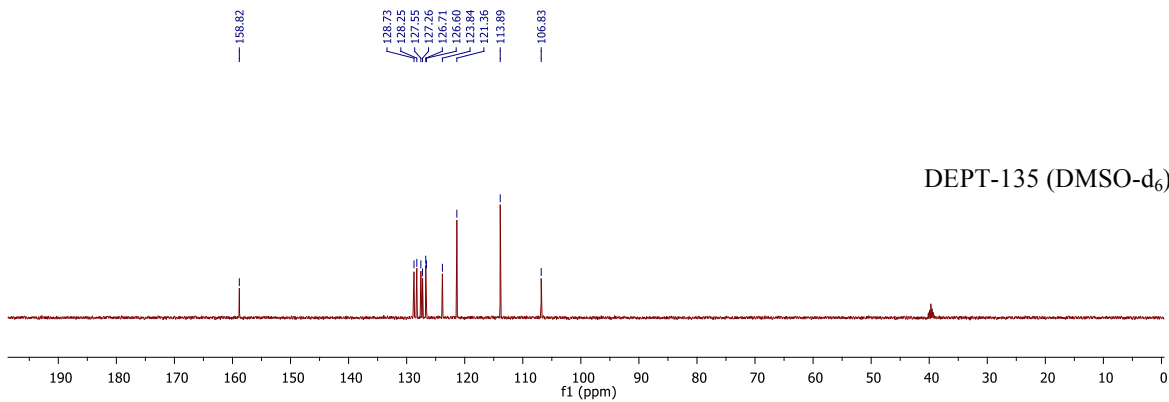

Compound-4a

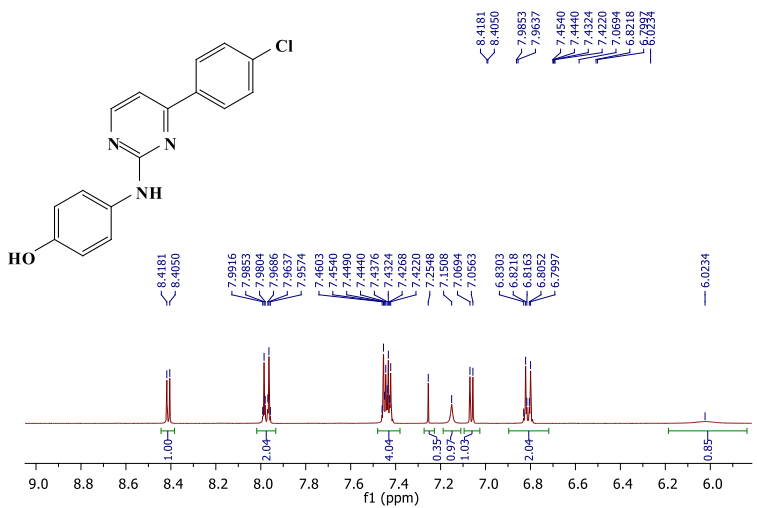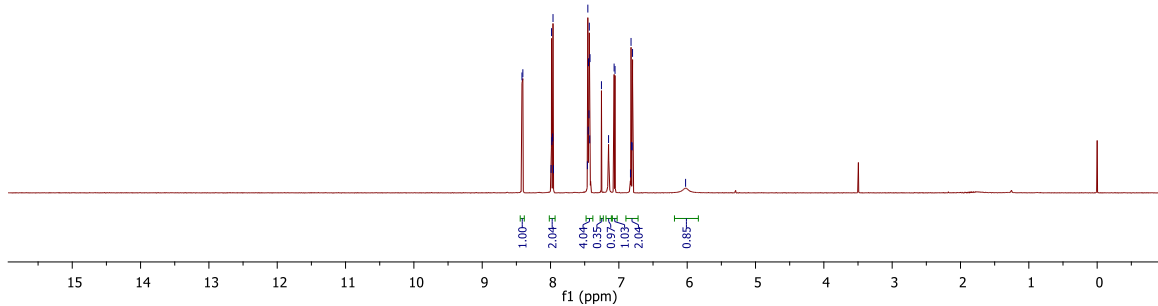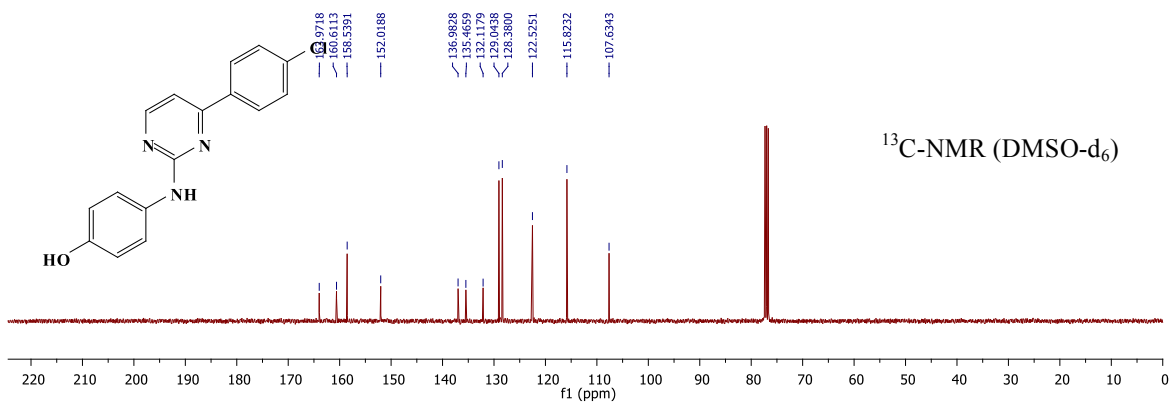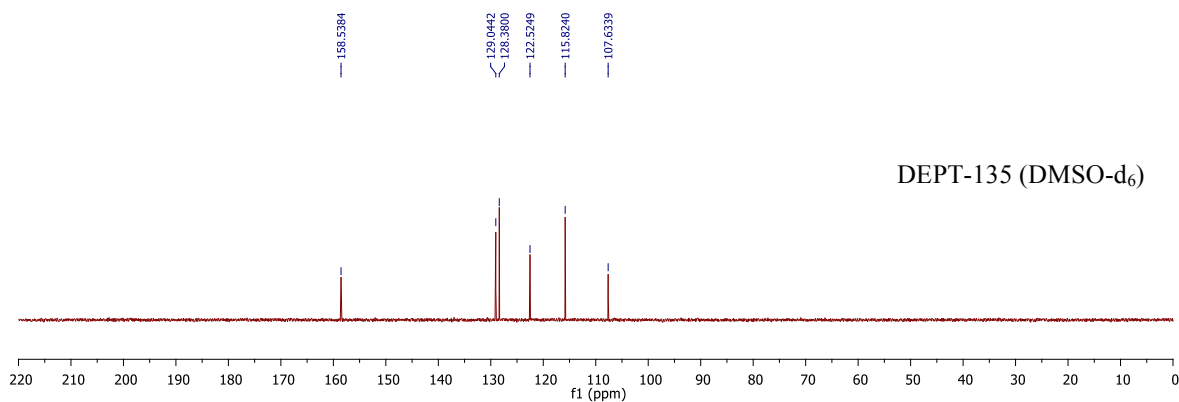

### Compound-4b

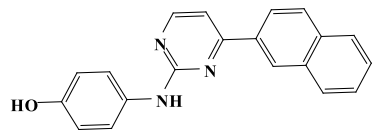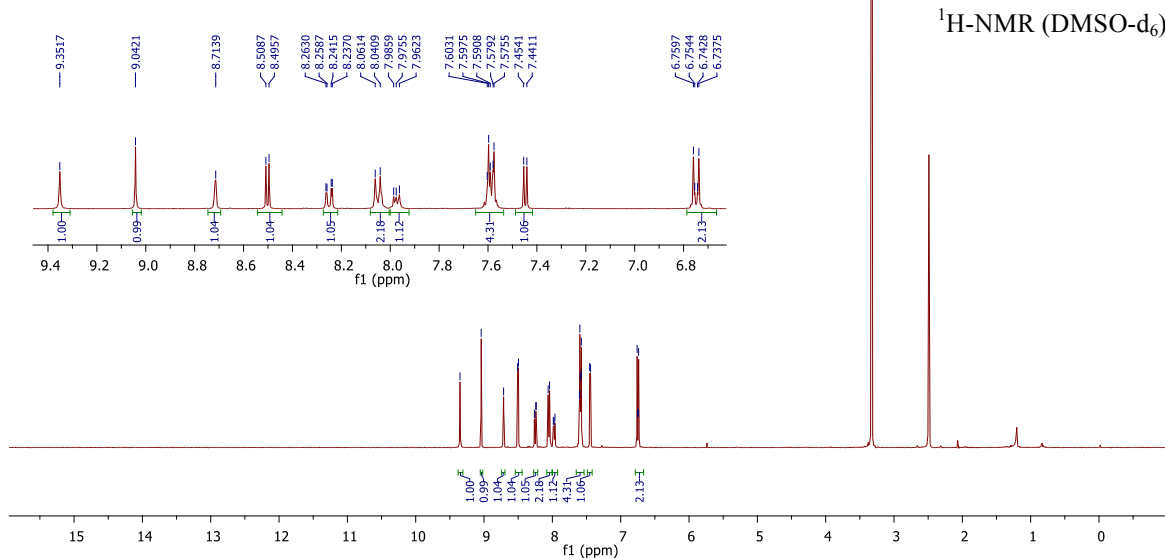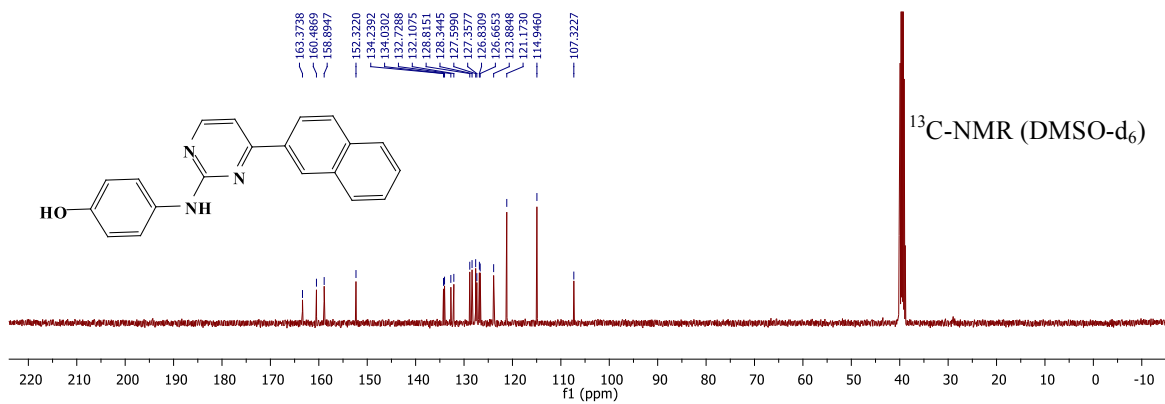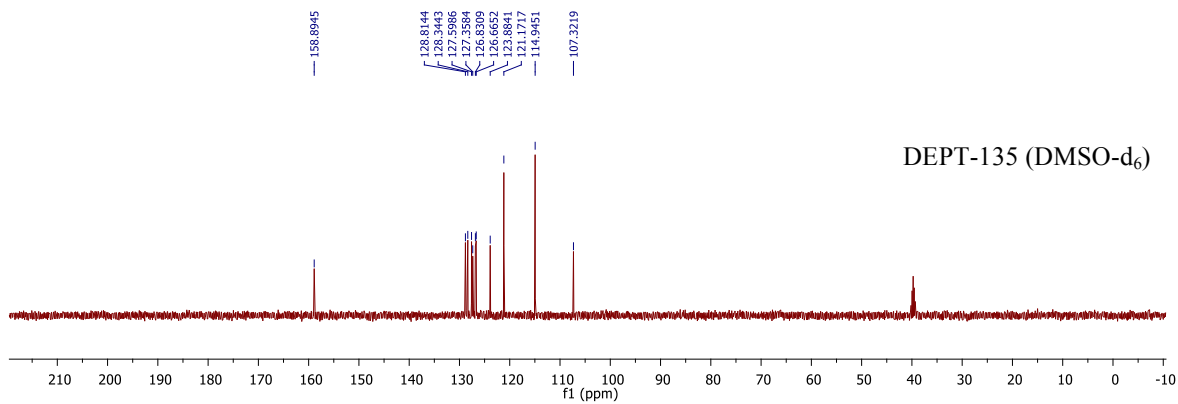

Compound-5a

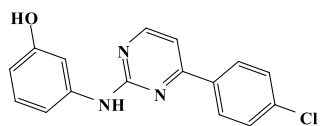

<sup>1</sup>H-NMR (DMSO-d<sub>6</sub>)

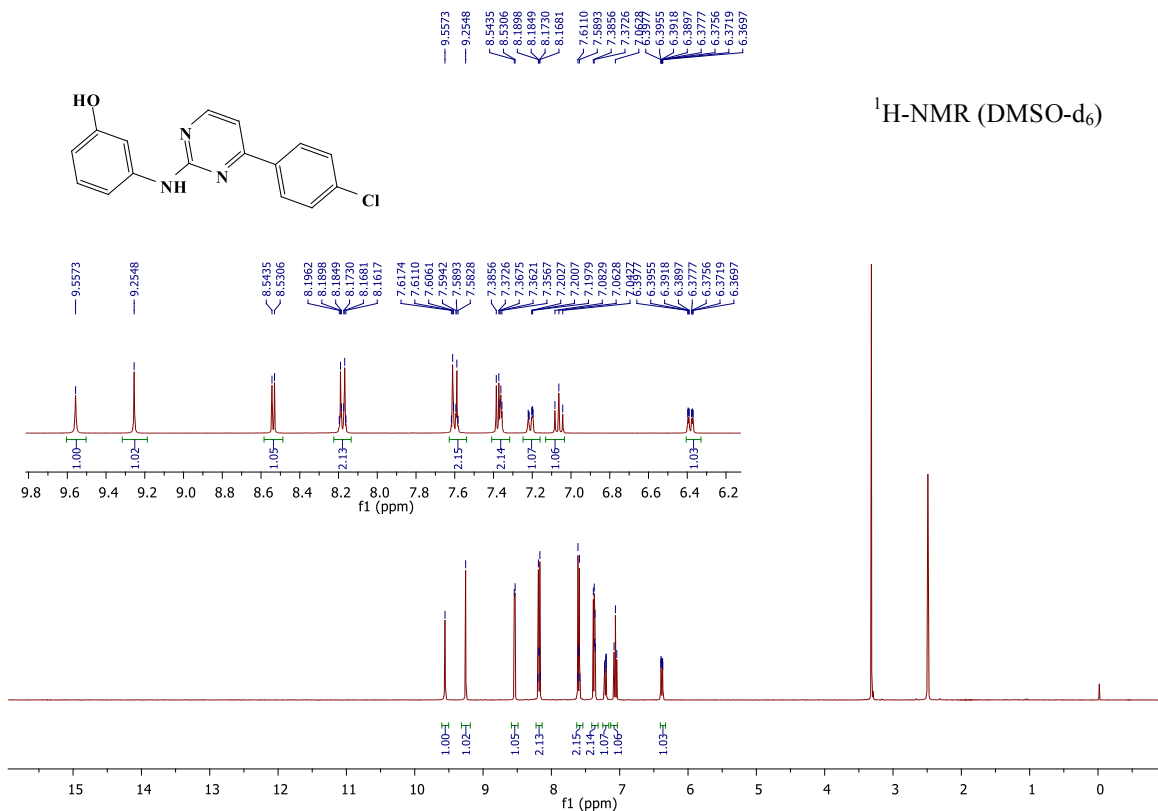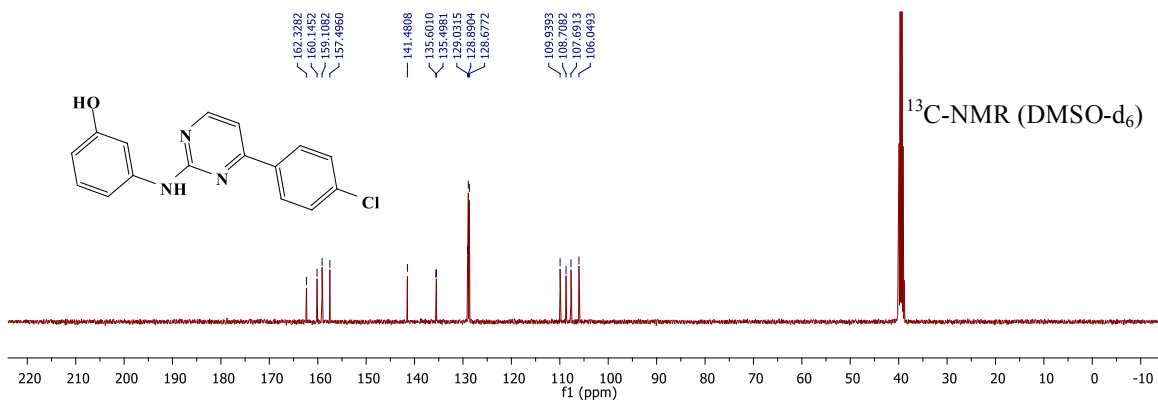

DEPT-135 (DMSO-d<sub>6</sub>)

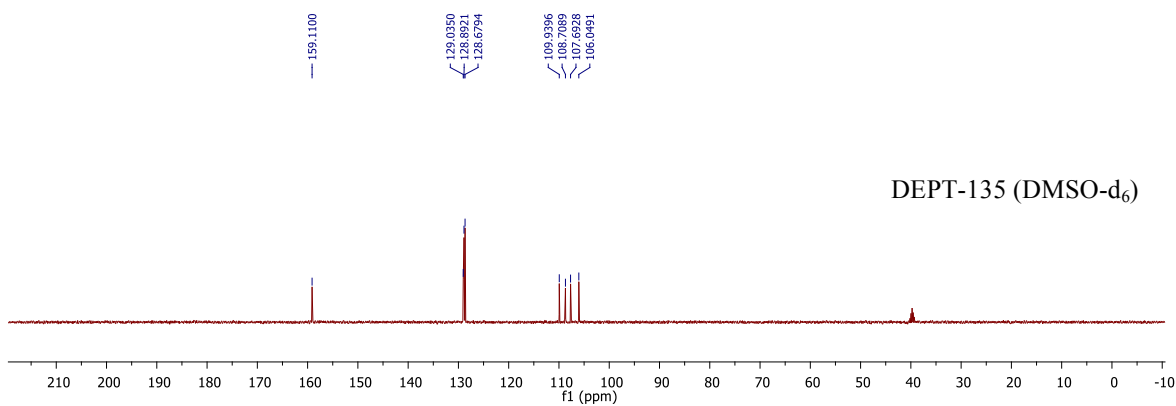

**Compound-5b**

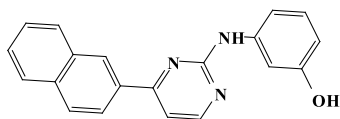

<sup>1</sup>H-NMR (DMSO-d<sub>6</sub>)

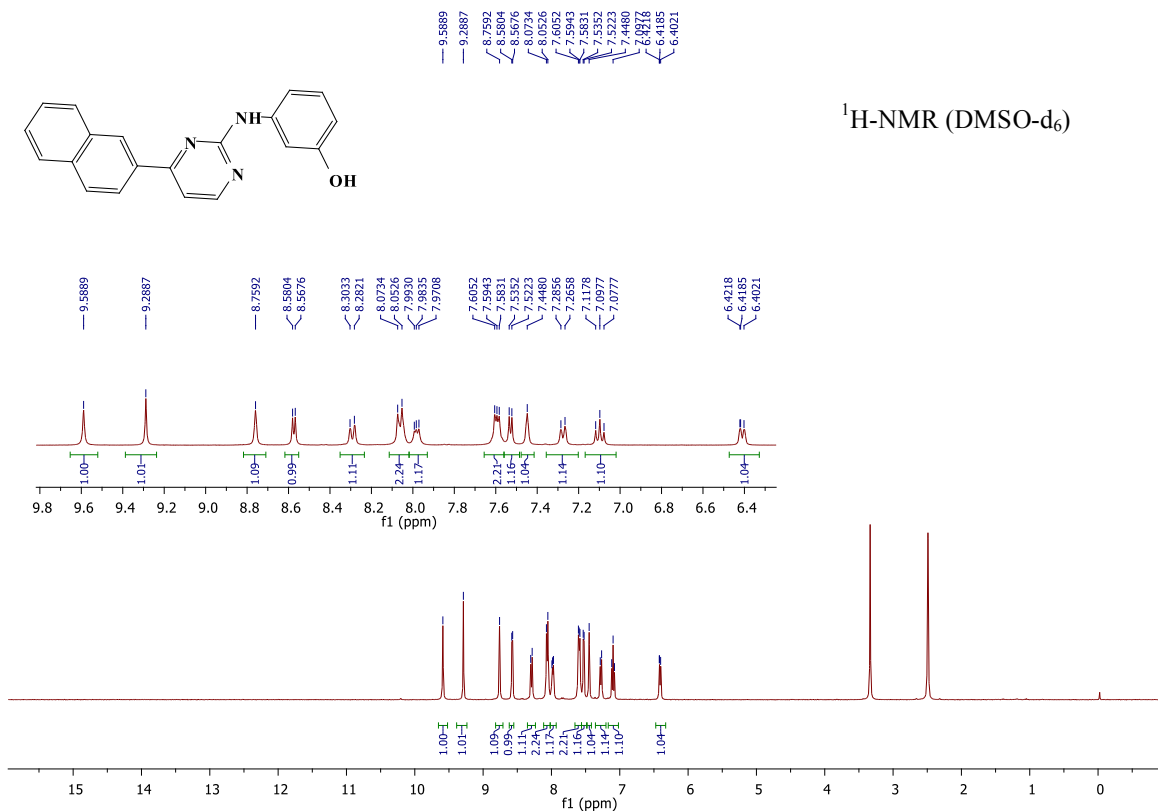

<sup>13</sup>C-NMR (DMSO-d<sub>6</sub>)

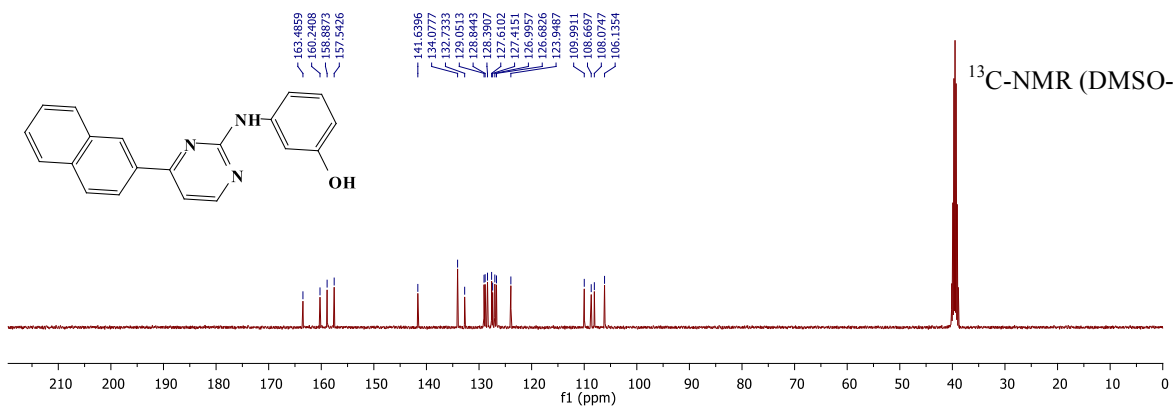

DEPT-135 (DMSO-d<sub>6</sub>)

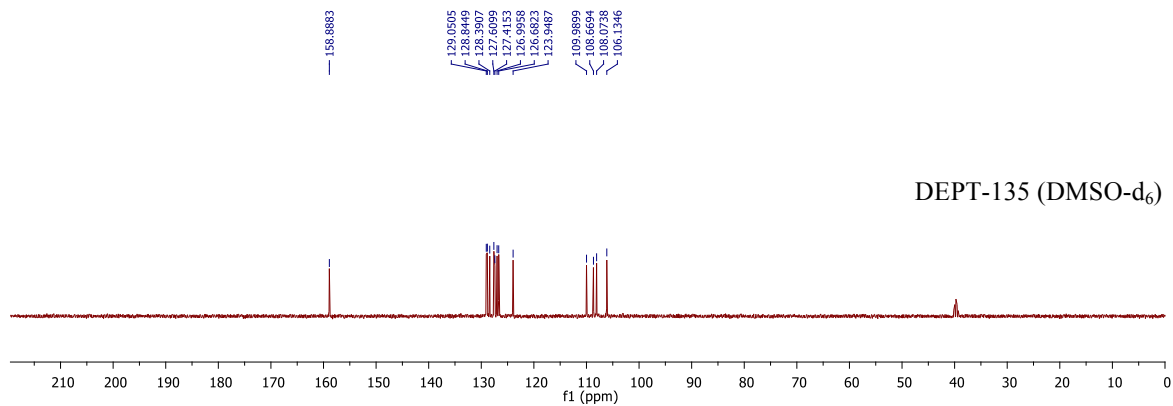



Compound-6a

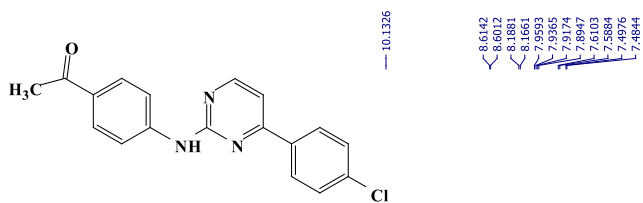

<sup>1</sup>H-NMR (DMSO-d<sub>6</sub>)

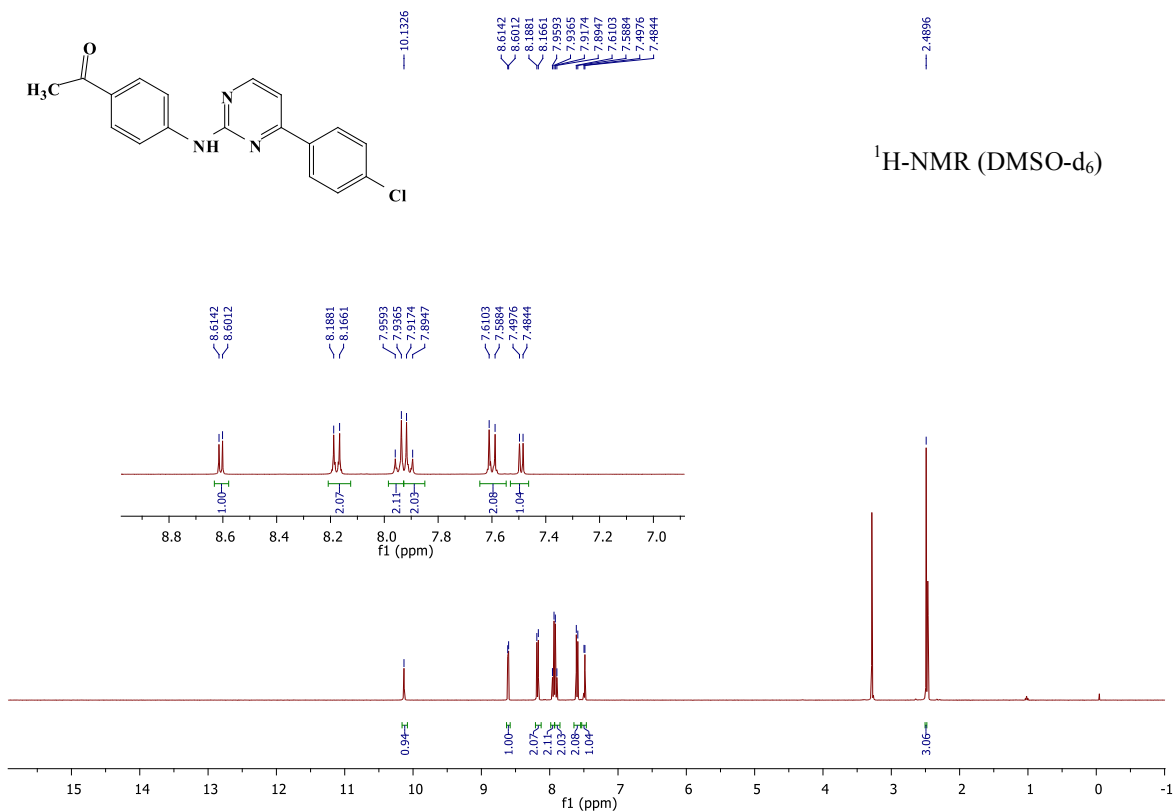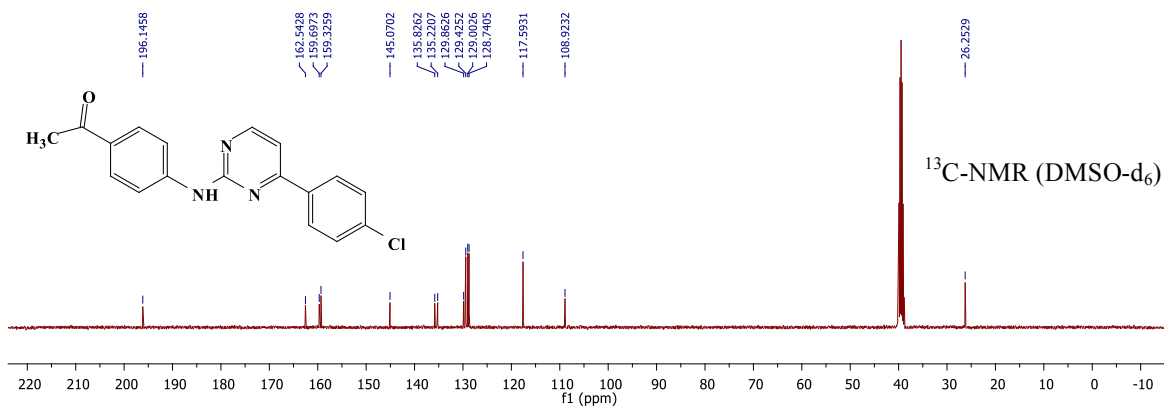

<sup>13</sup>C-NMR (DMSO-d<sub>6</sub>)

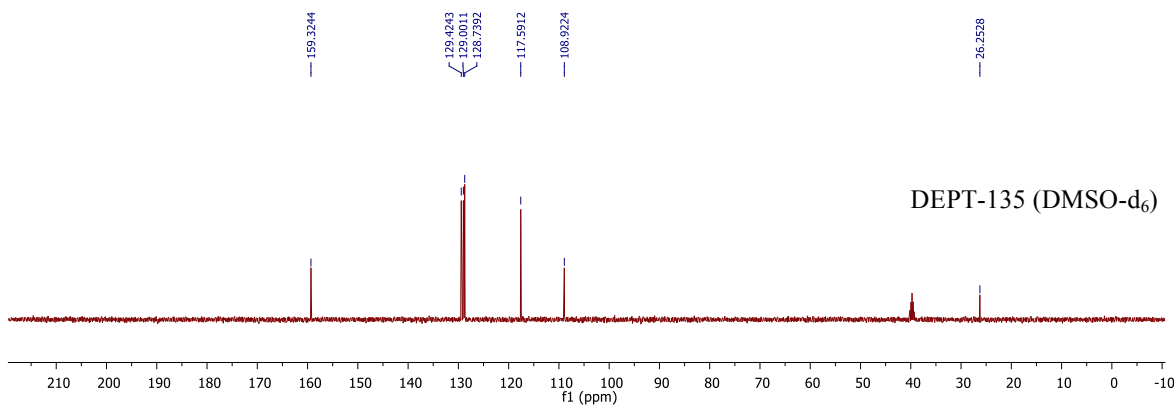

DEPT-135 (DMSO-d<sub>6</sub>)

# Compound-6b

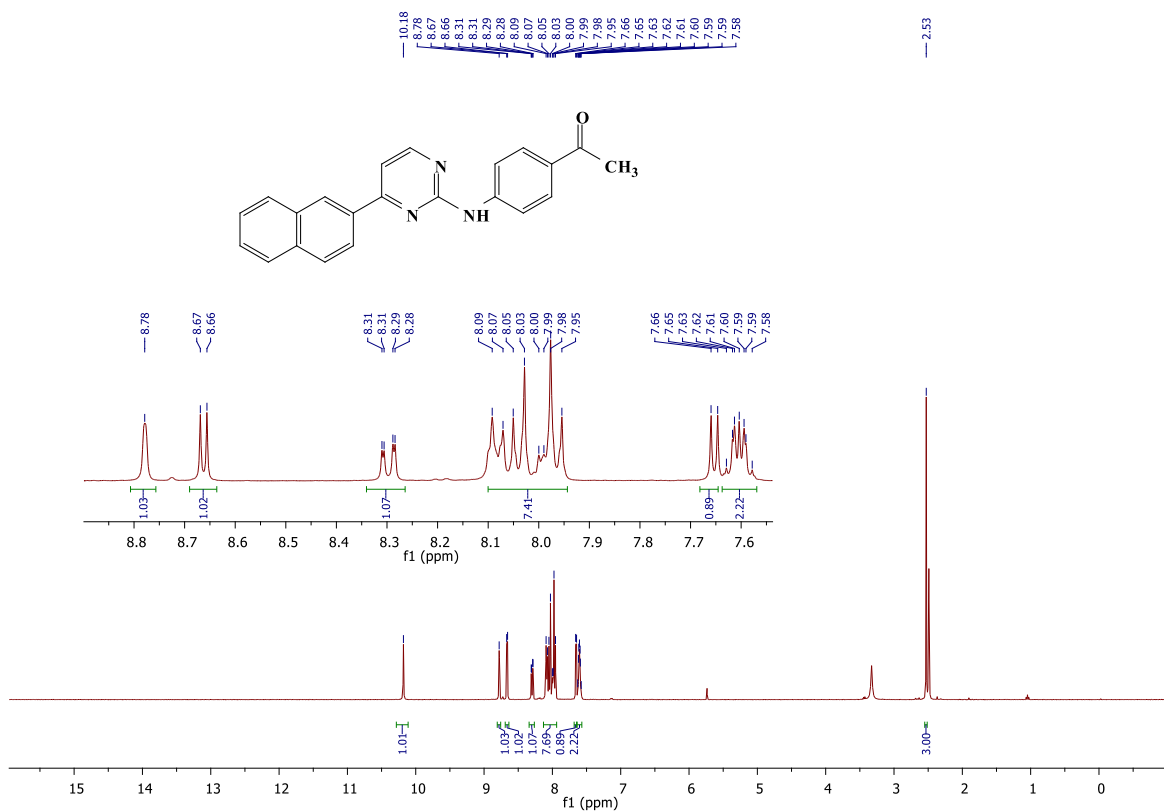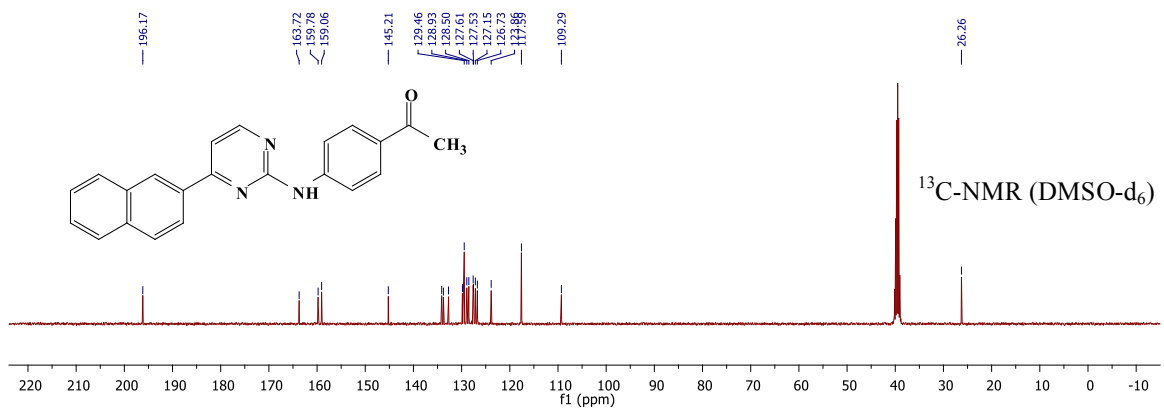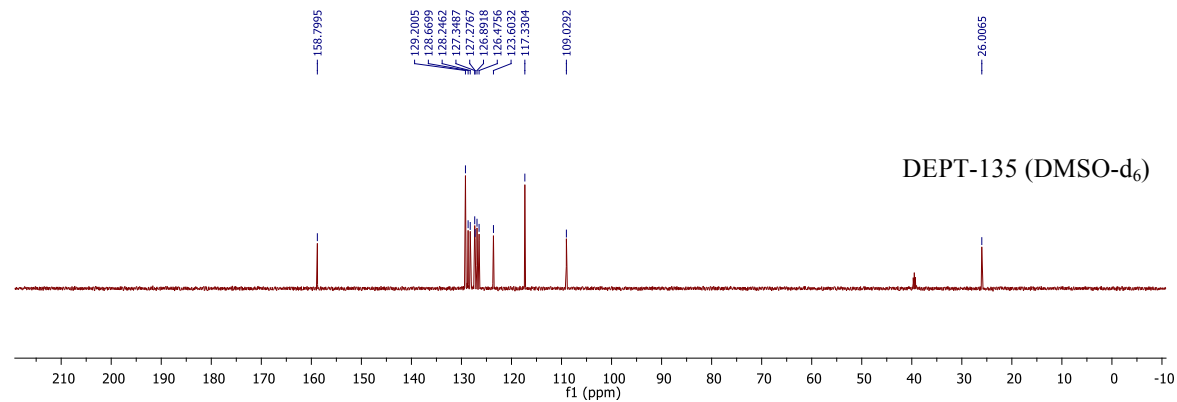

Compound-7a

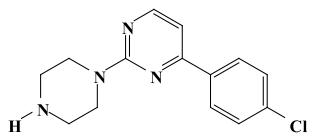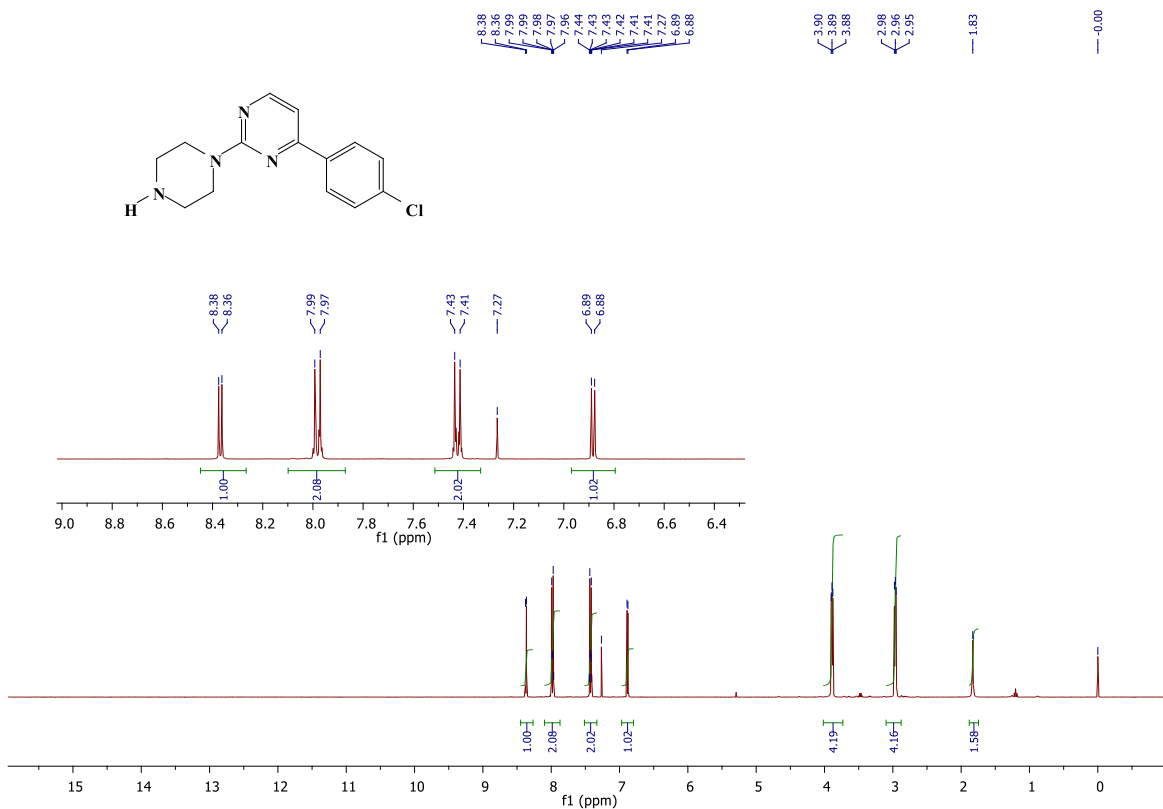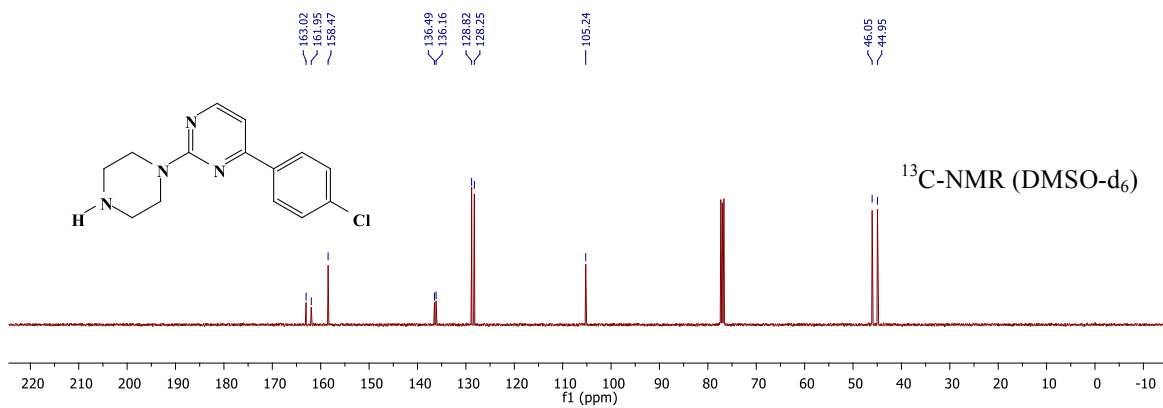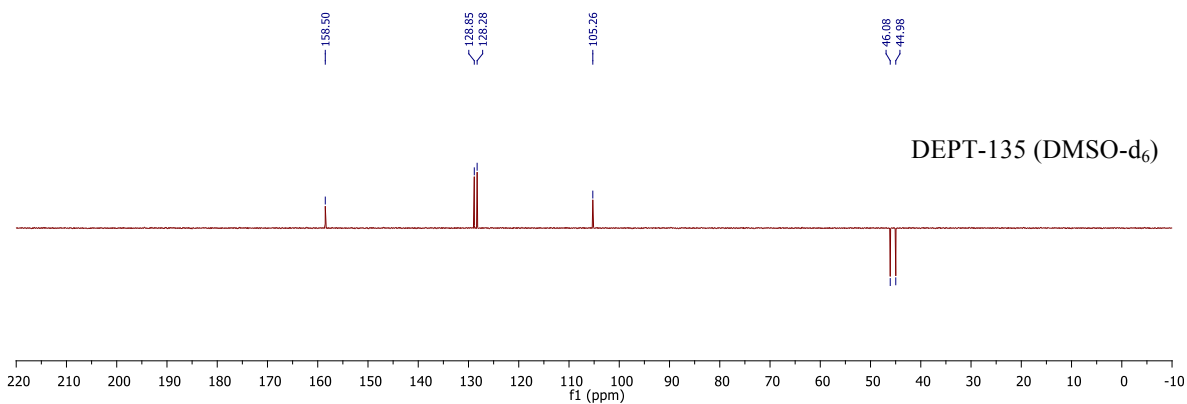

# Compound-7b

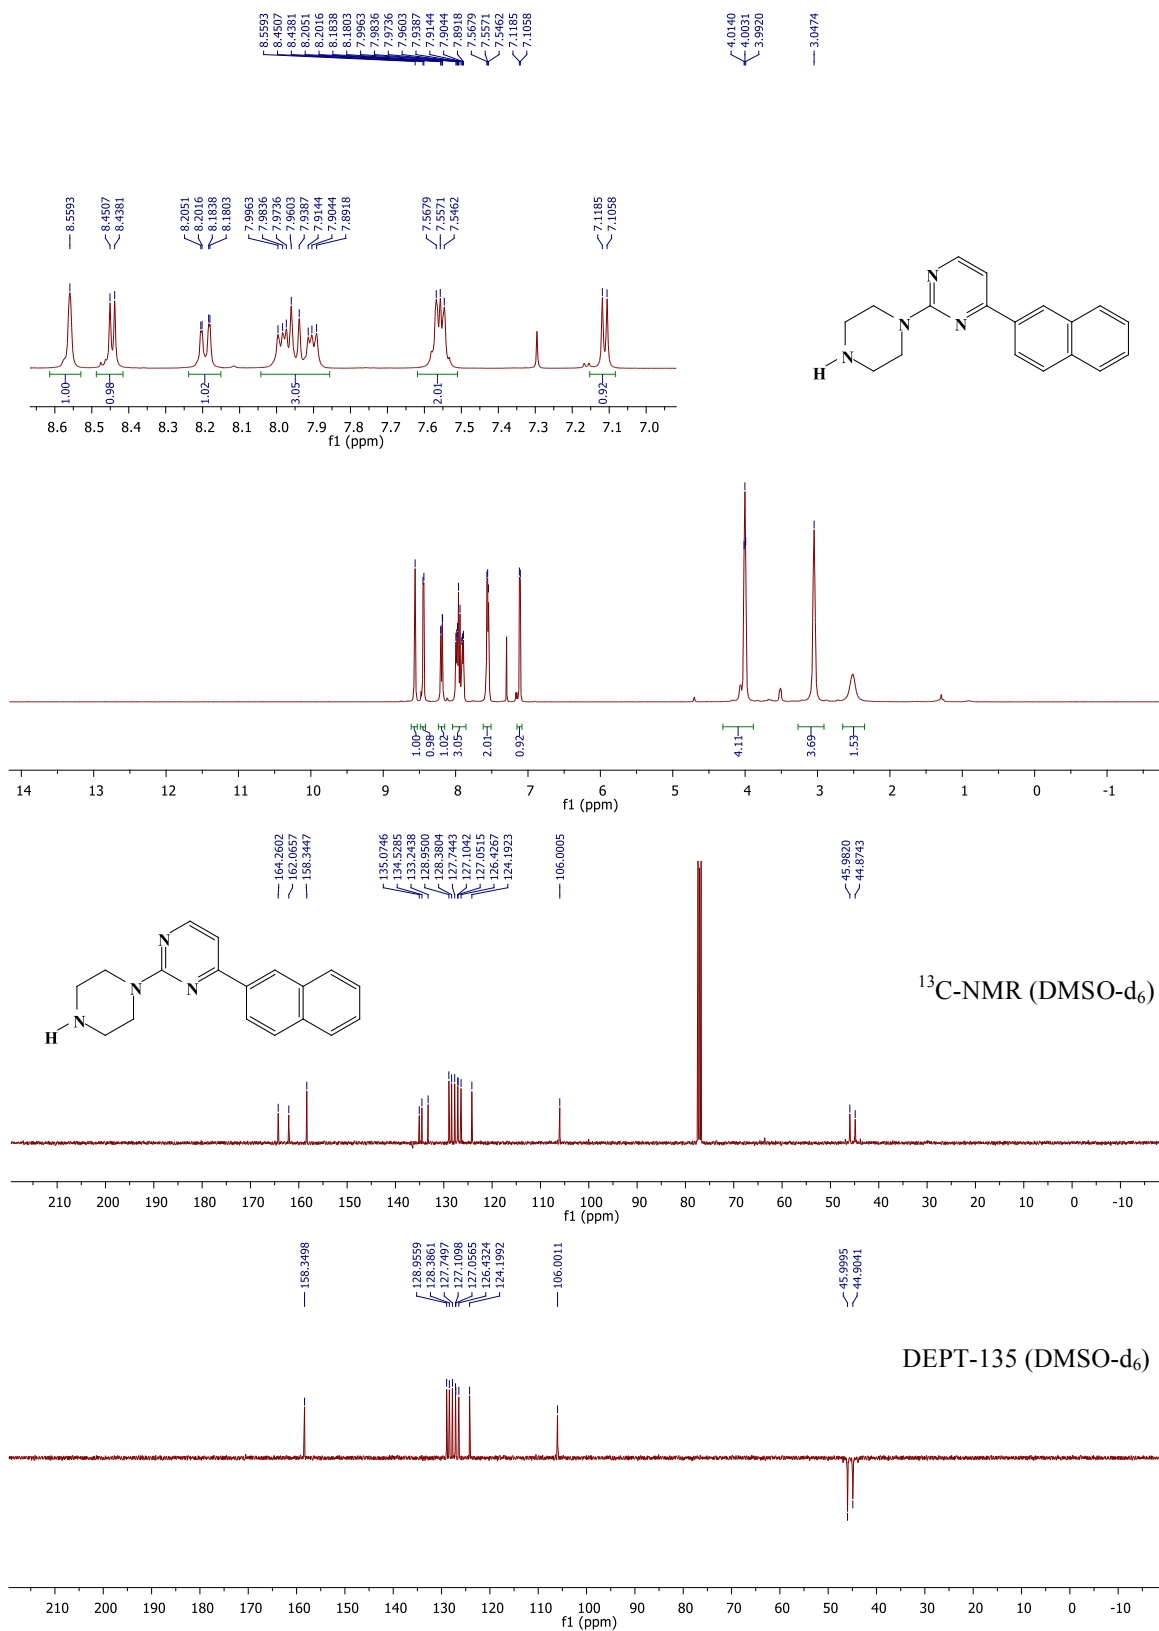

# Compound-8a

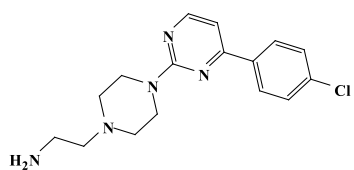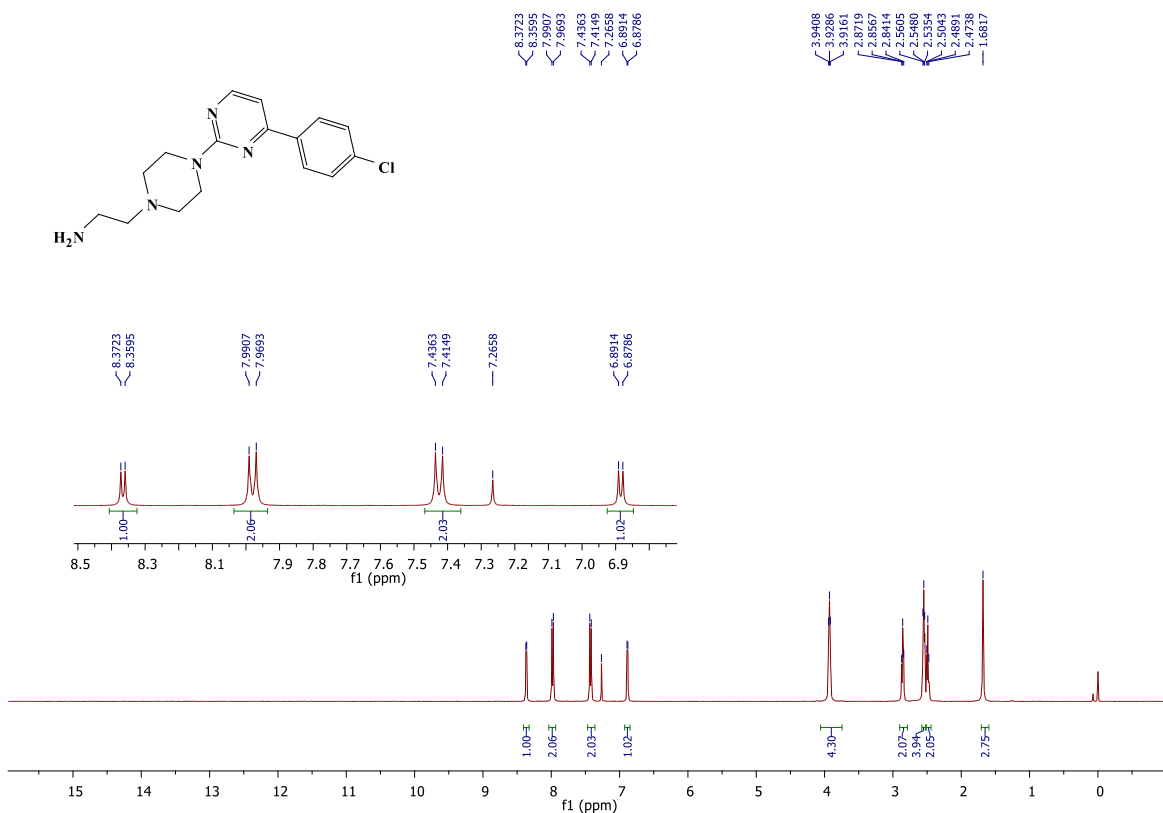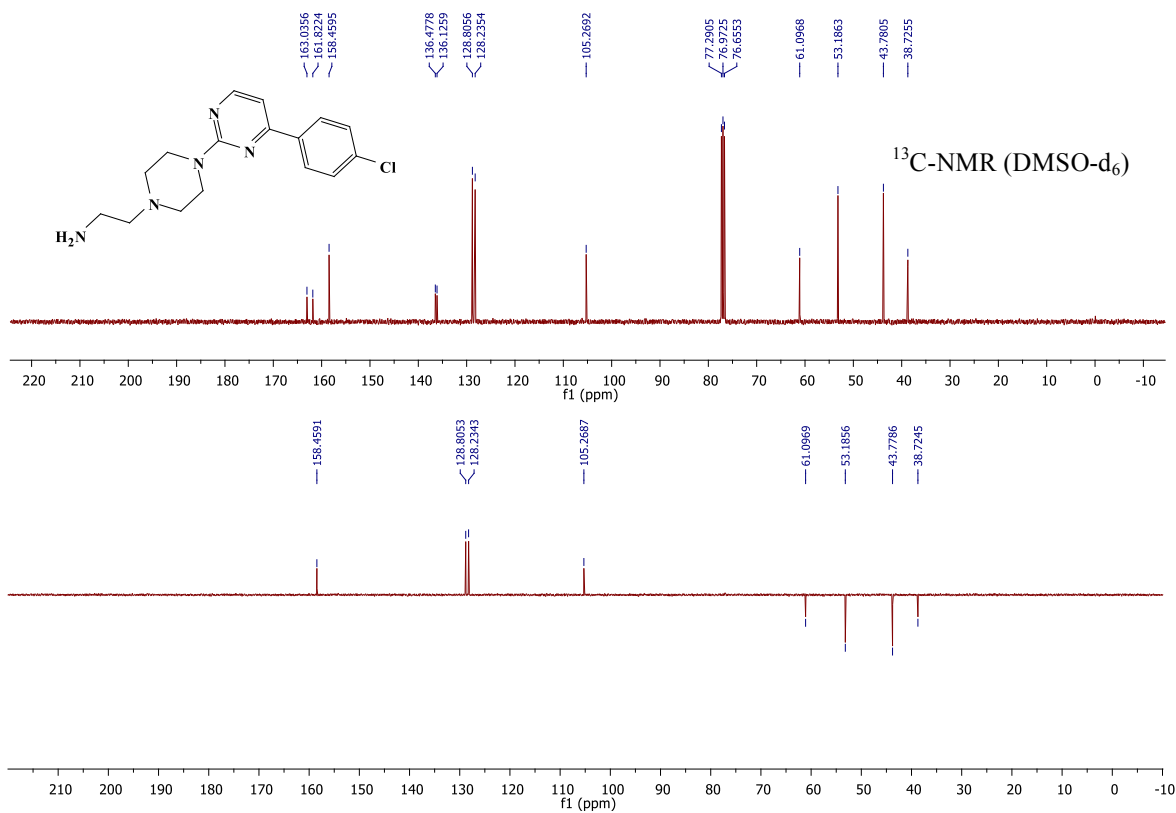

**Compound-8b**

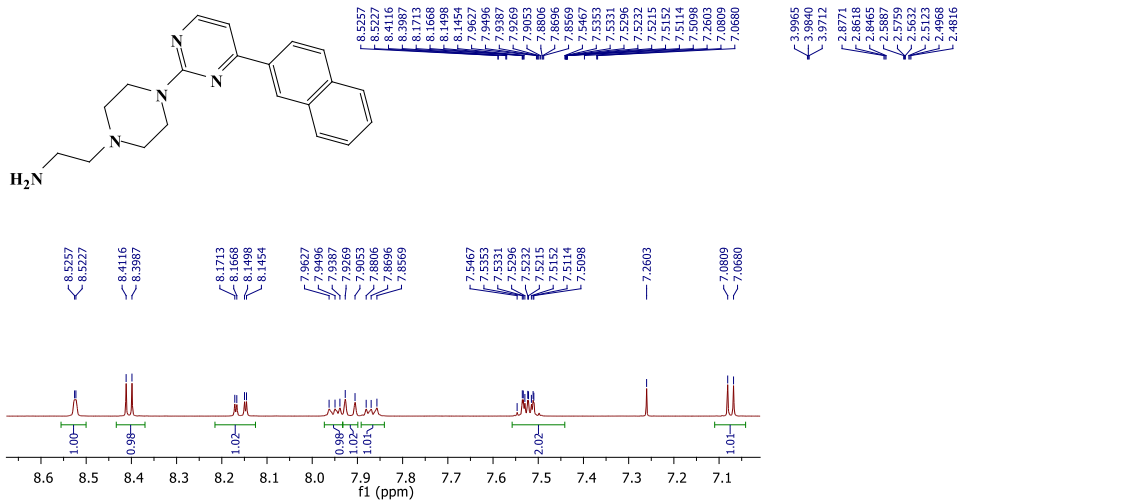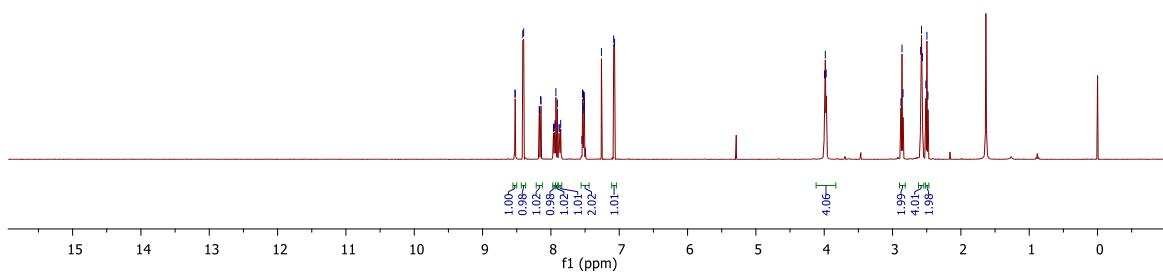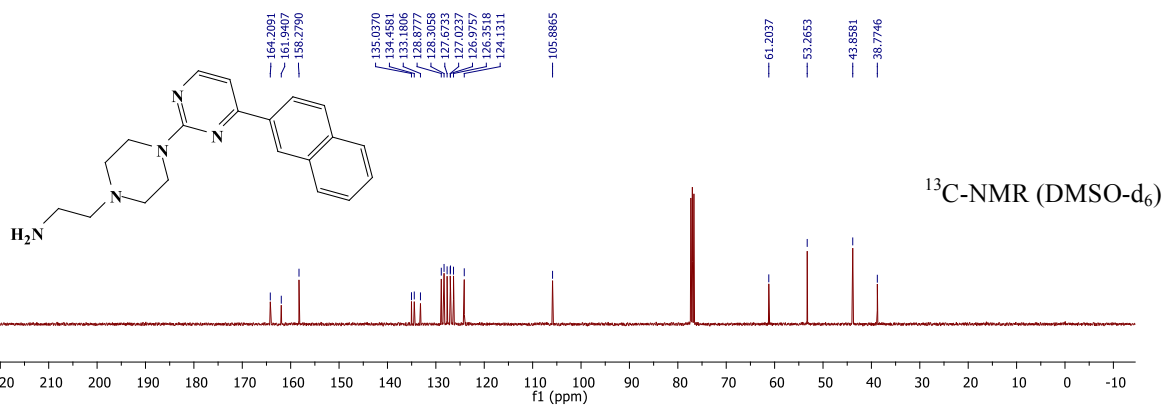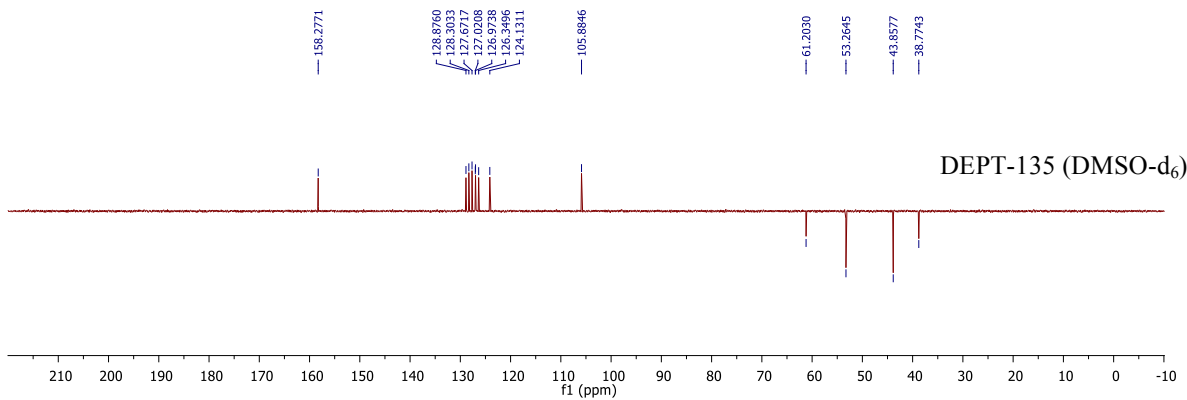

**Compound-9**

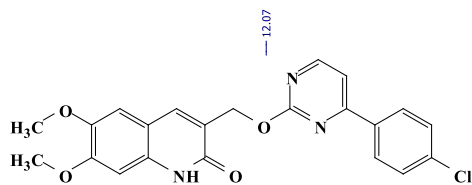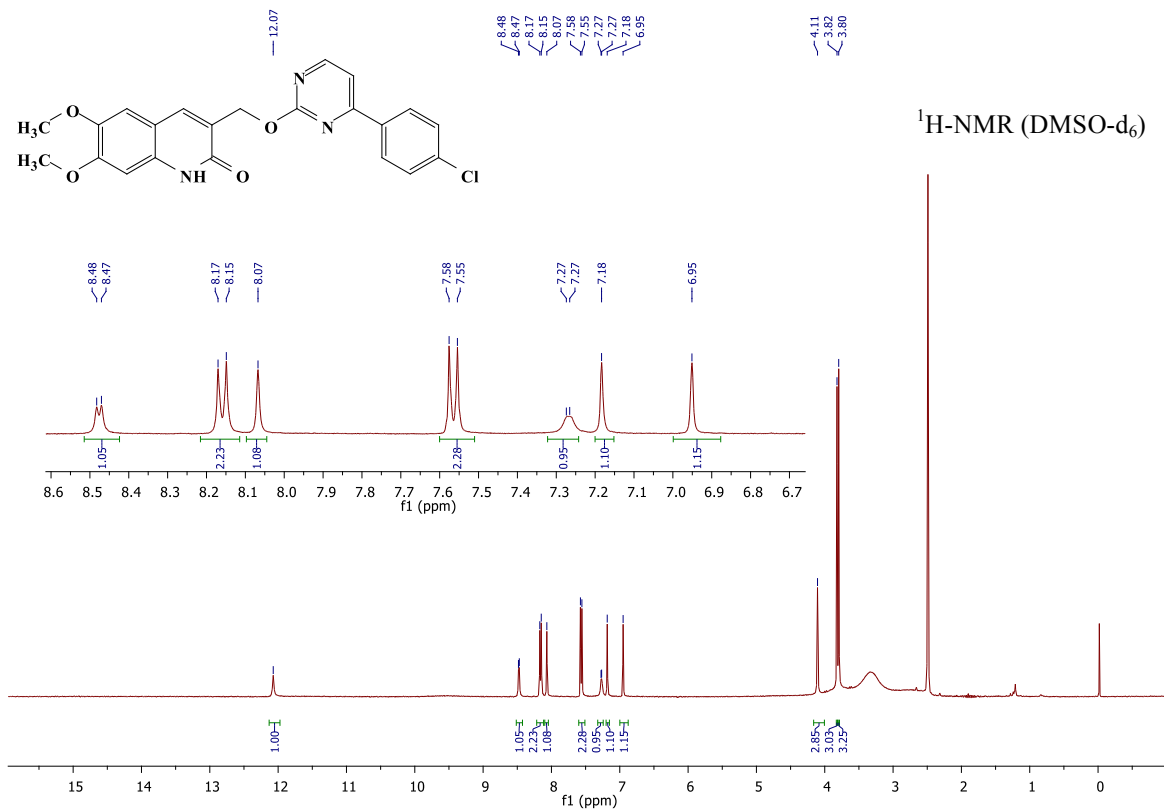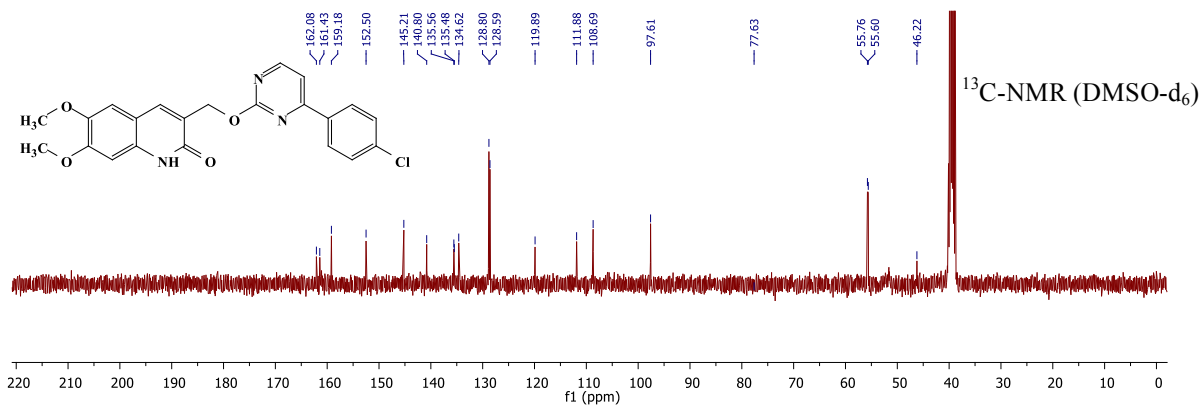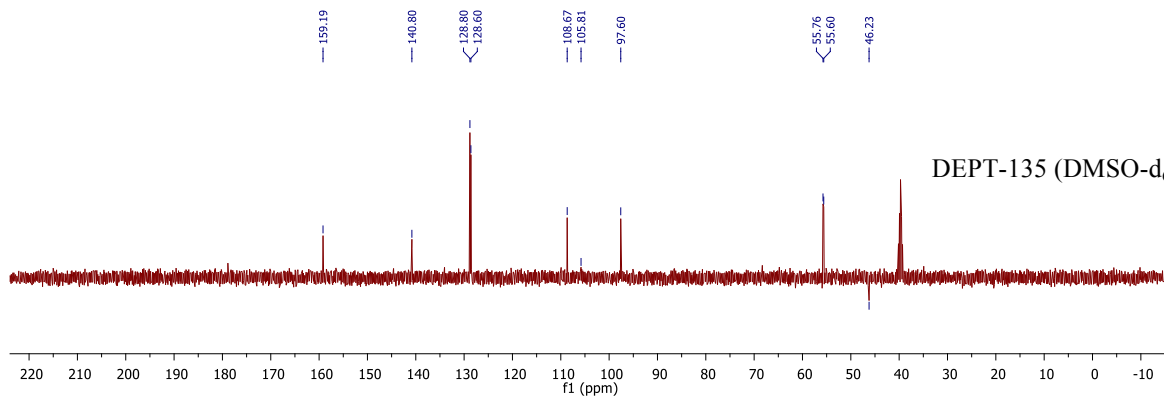

Compound-10a

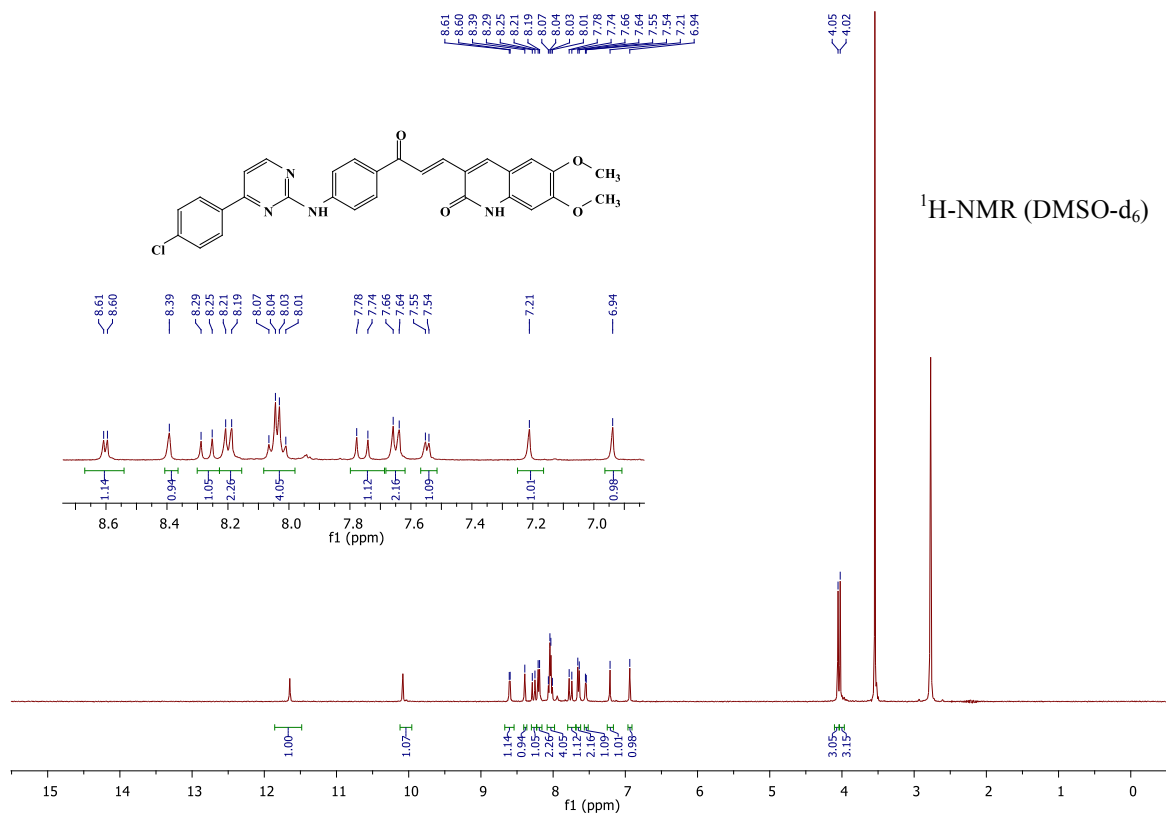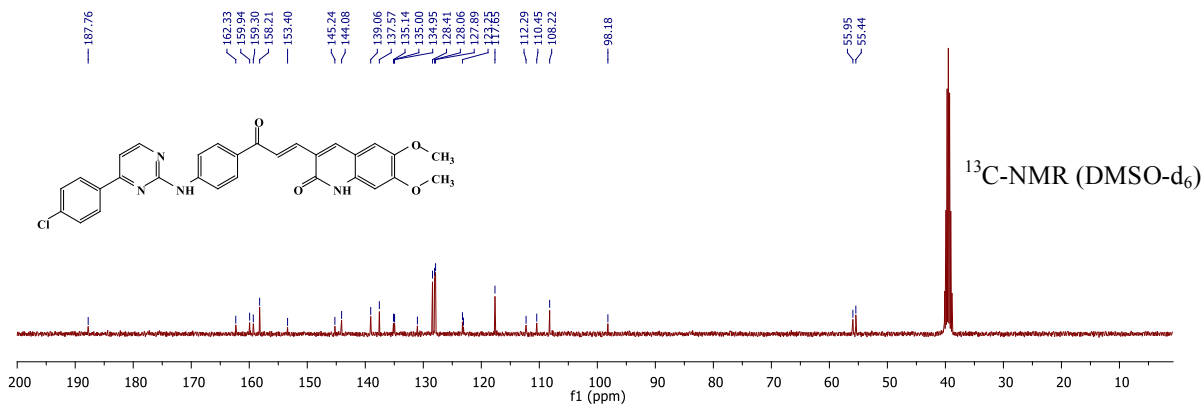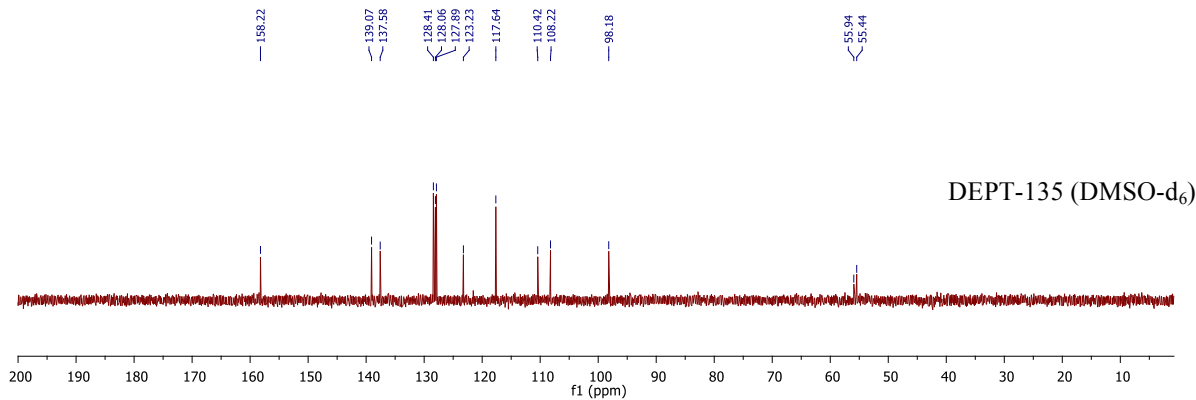



# Compound-10b

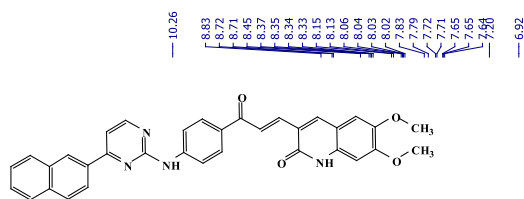

<sup>1</sup>H-NMR (DMSO-d<sub>6</sub>)

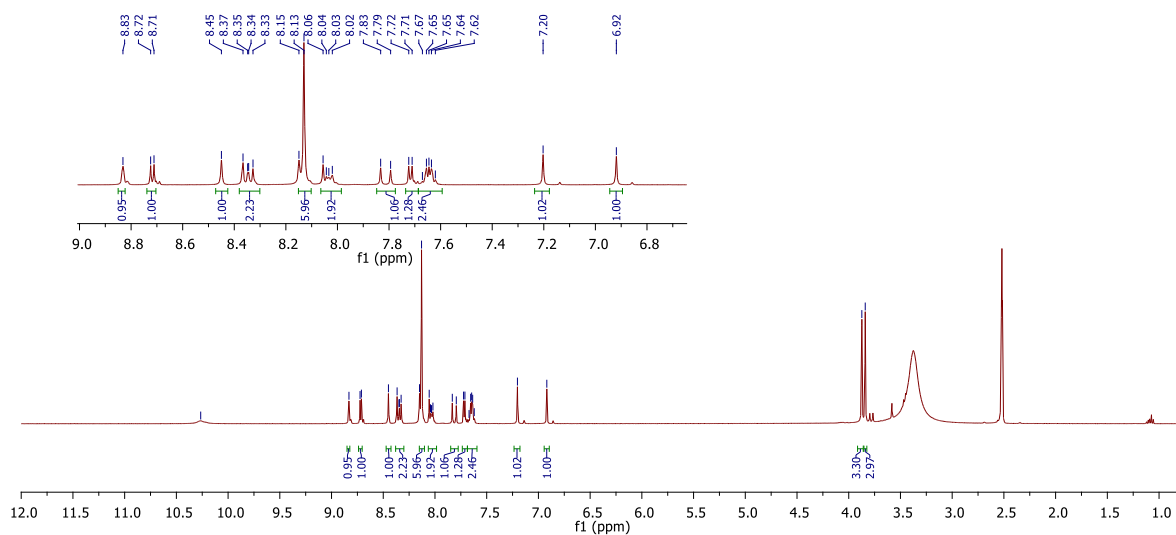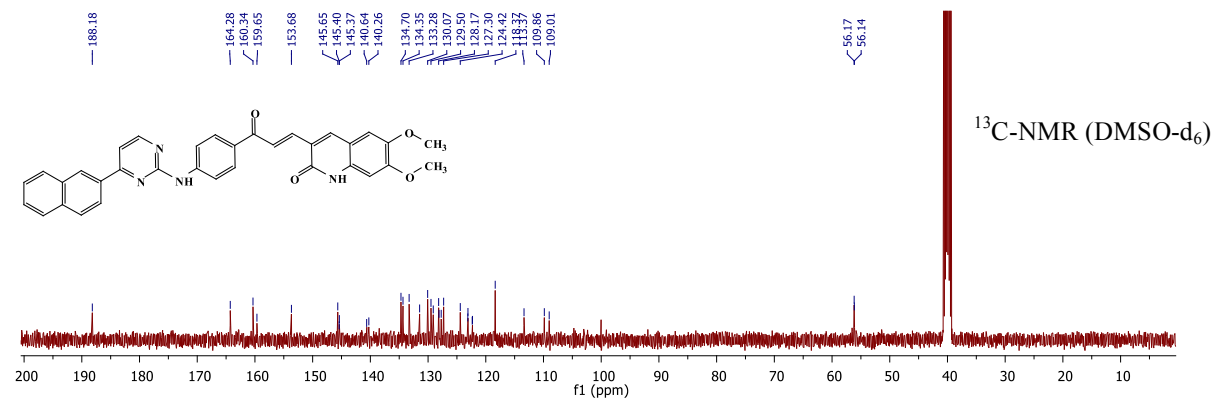

<sup>13</sup>C-NMR (DMSO-d<sub>6</sub>)

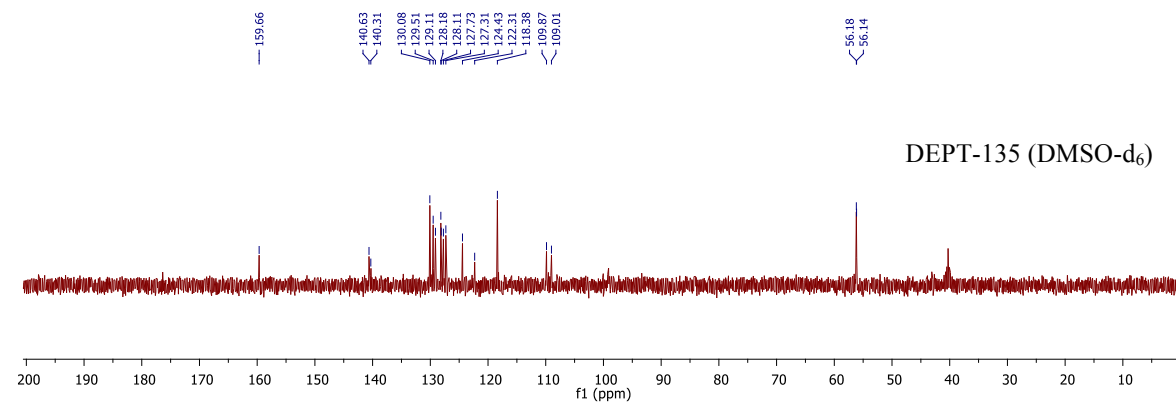

DEPT-135 (DMSO-d<sub>6</sub>)

Compound-11a

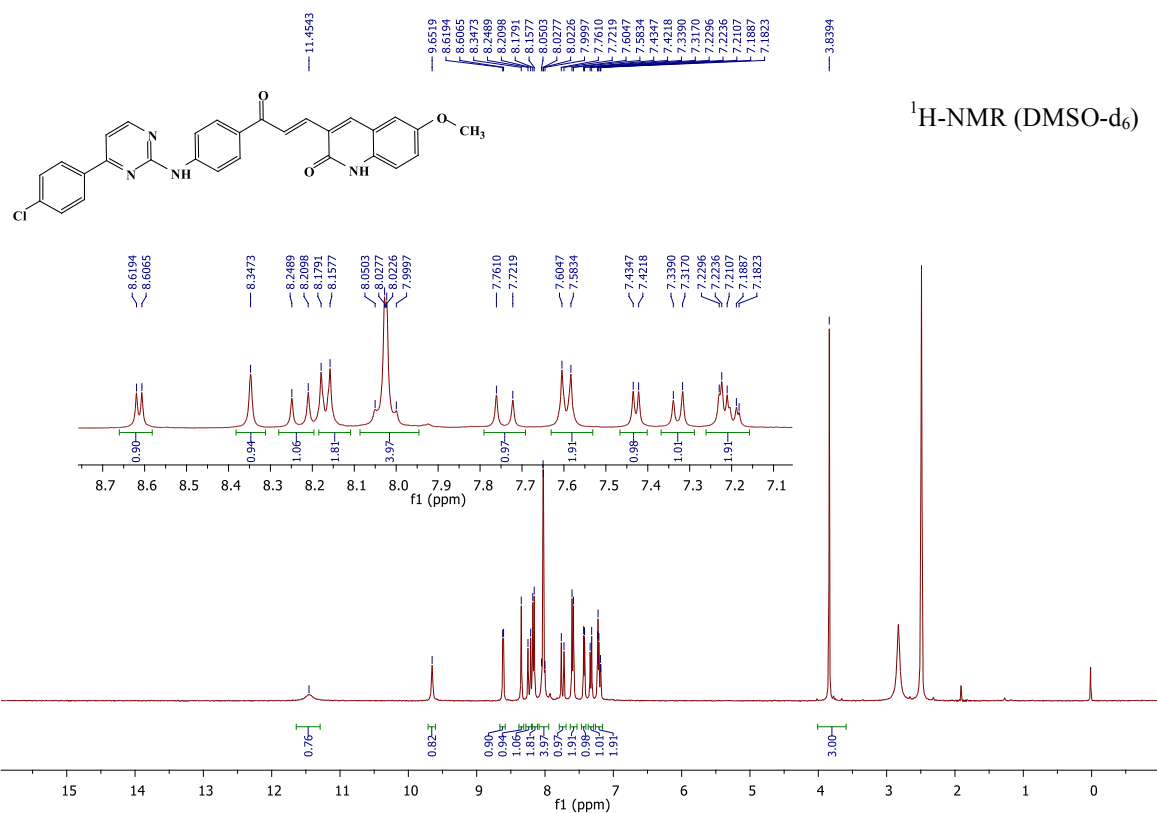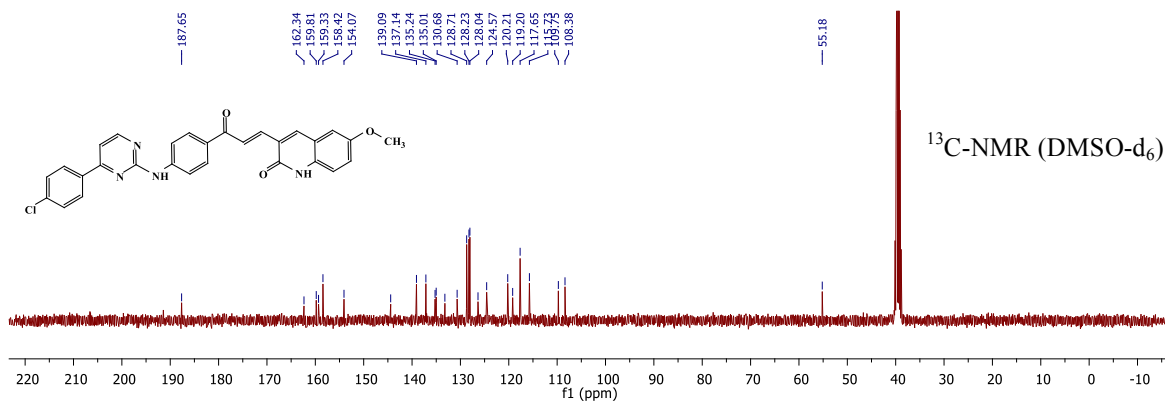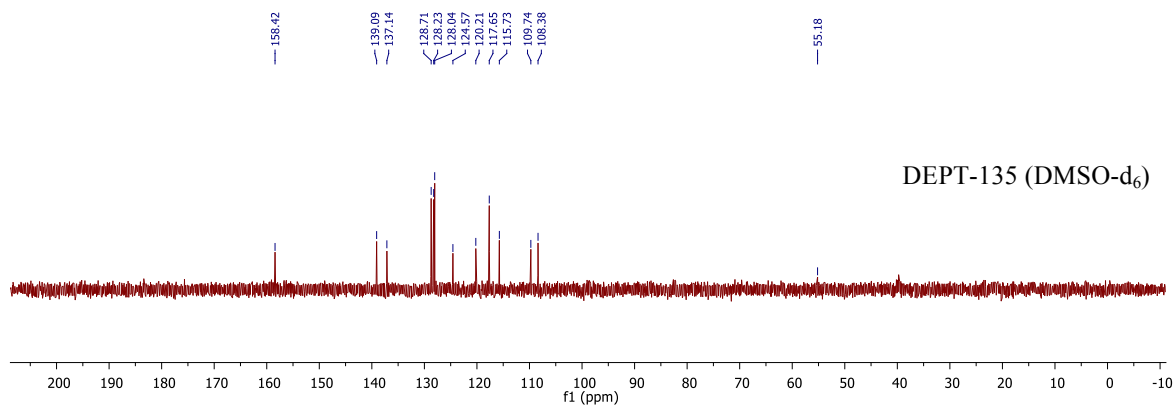

# Compound-11b

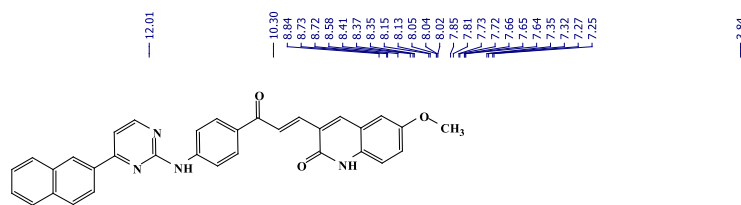

<sup>1</sup>H-NMR (DMSO-d<sub>6</sub>)

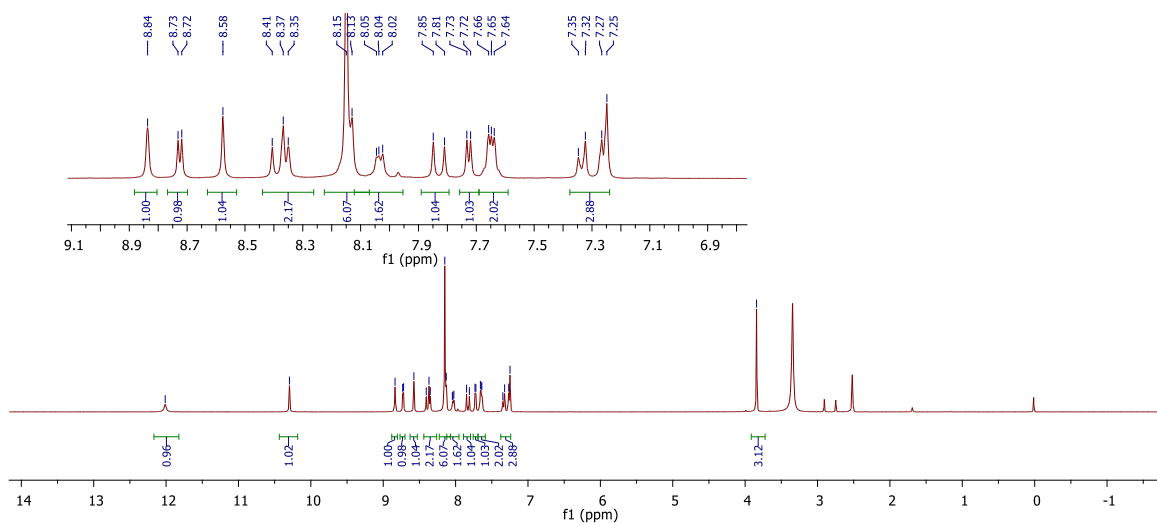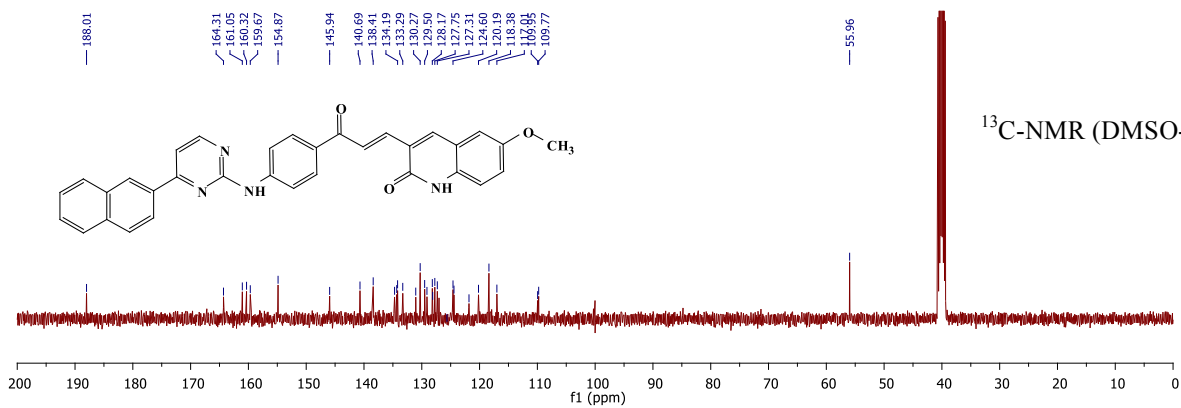

<sup>13</sup>C-NMR (DMSO-d<sub>6</sub>)

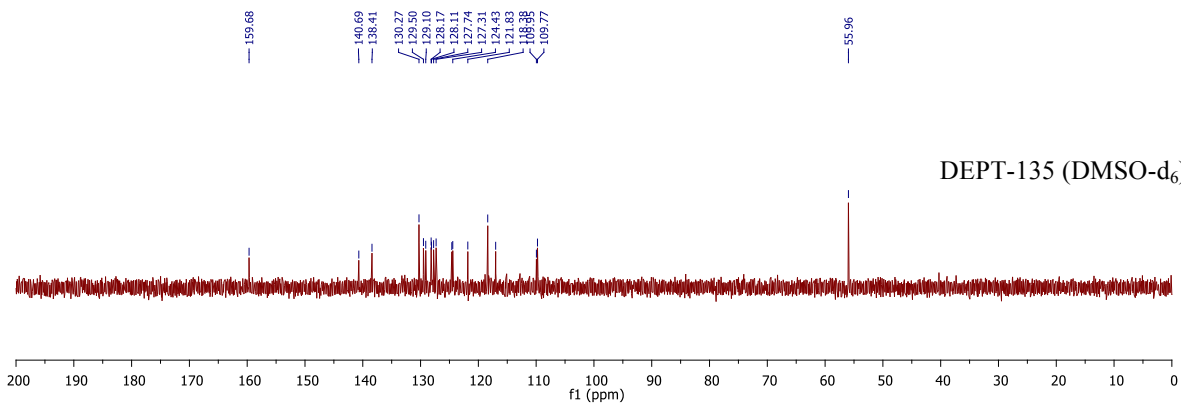

DEPT-135 (DMSO-d<sub>6</sub>)

Compound-12a

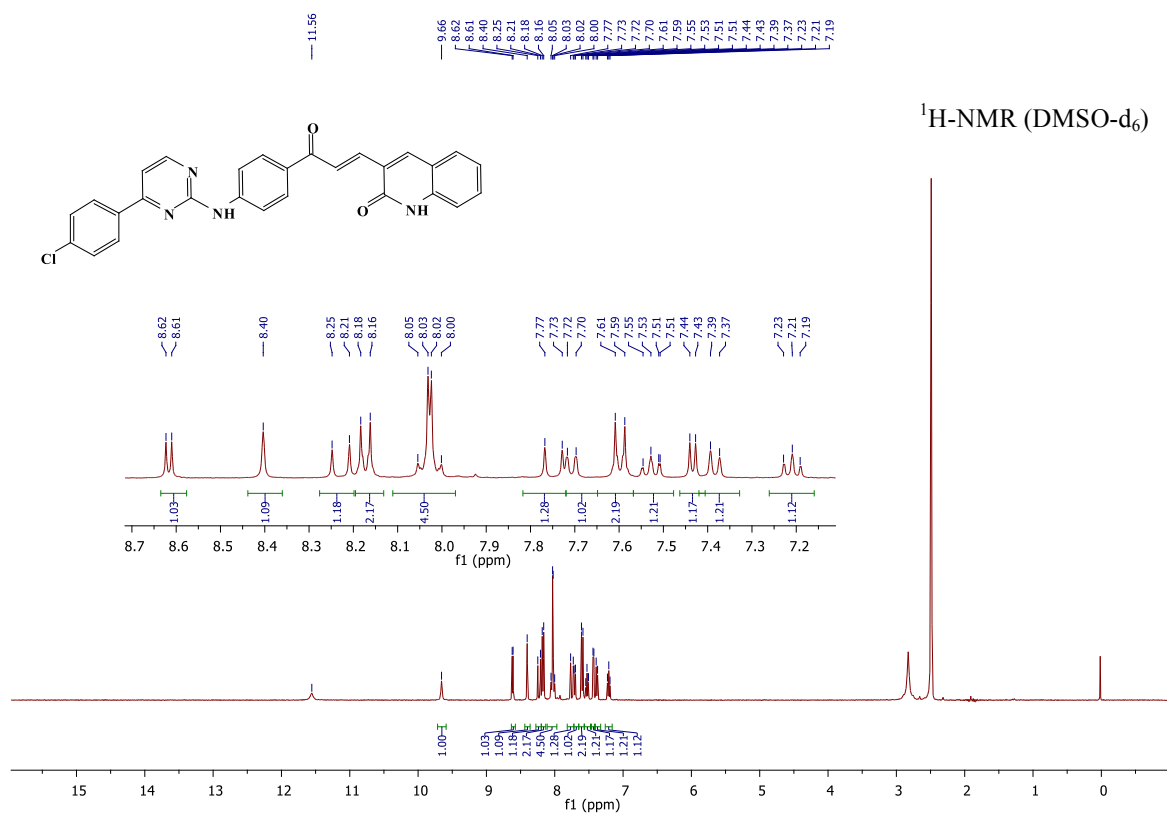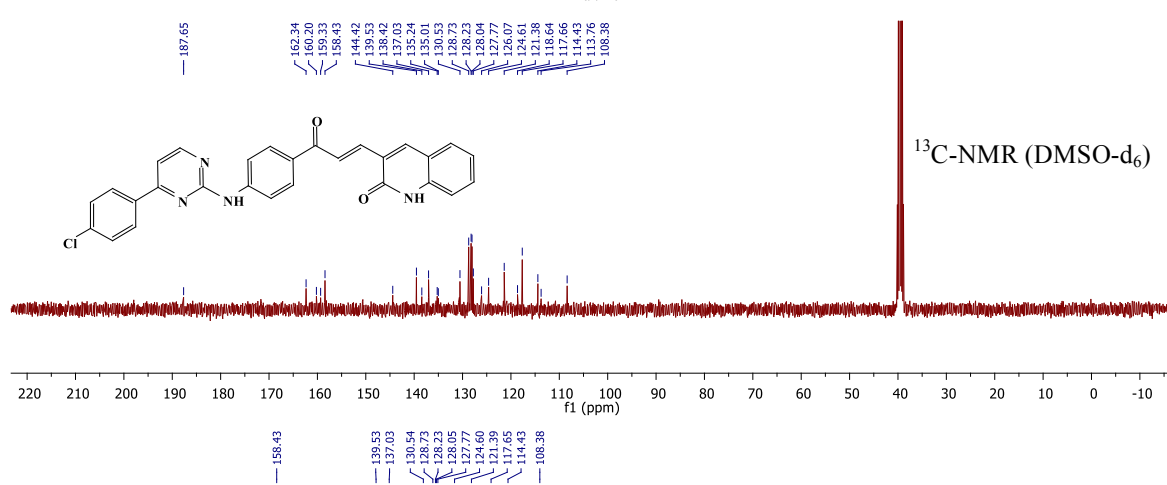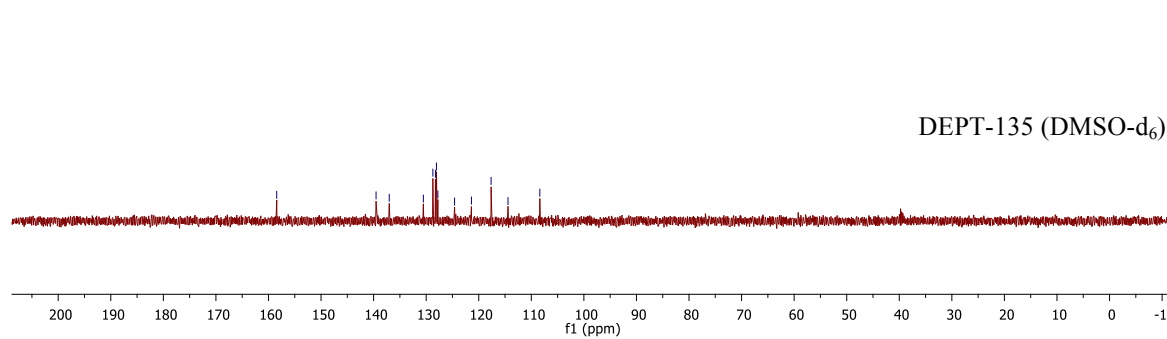

# Compound-12b

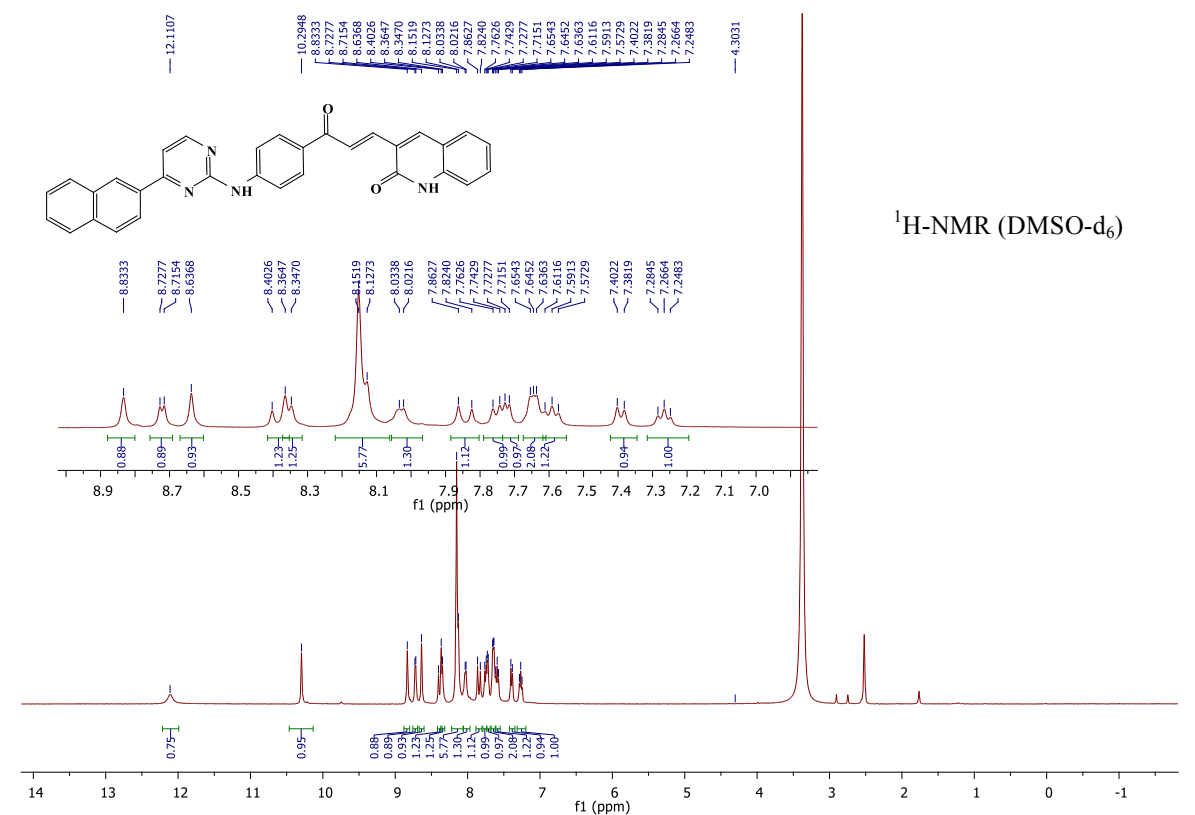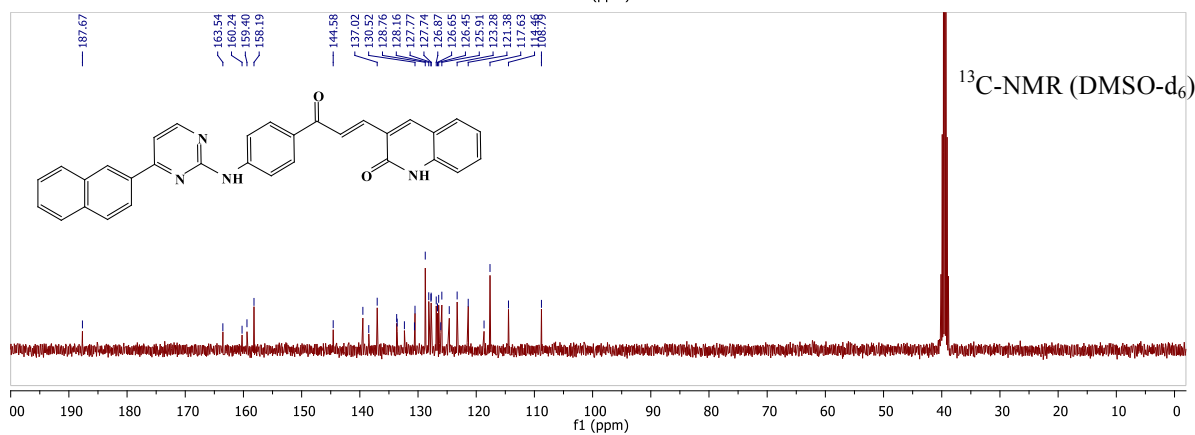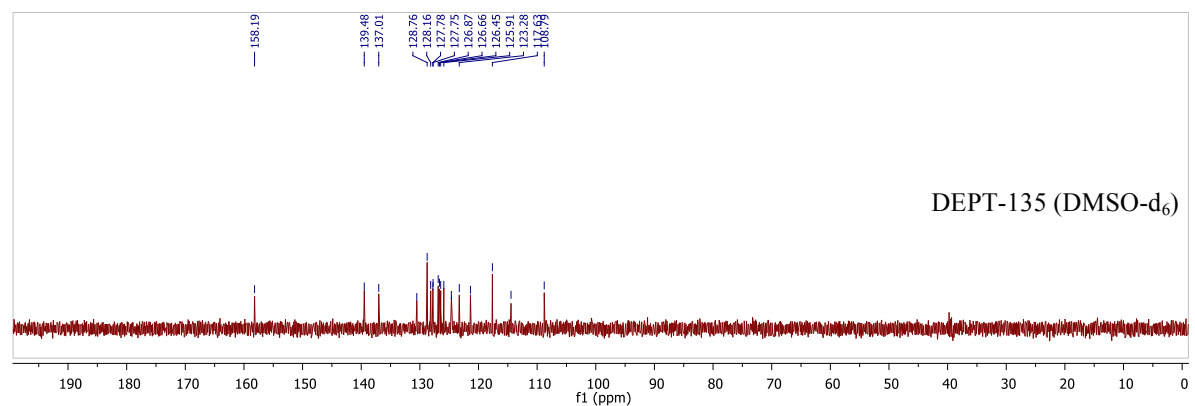

# Compound-13a

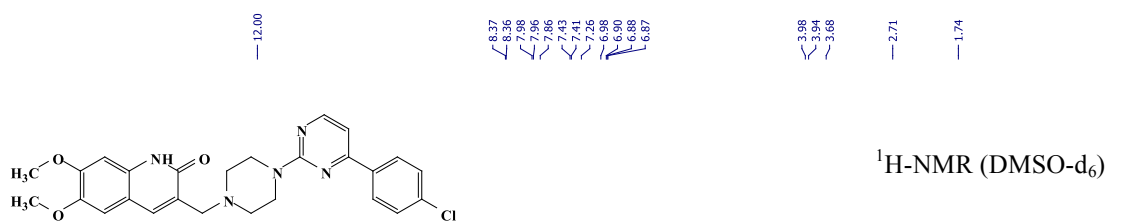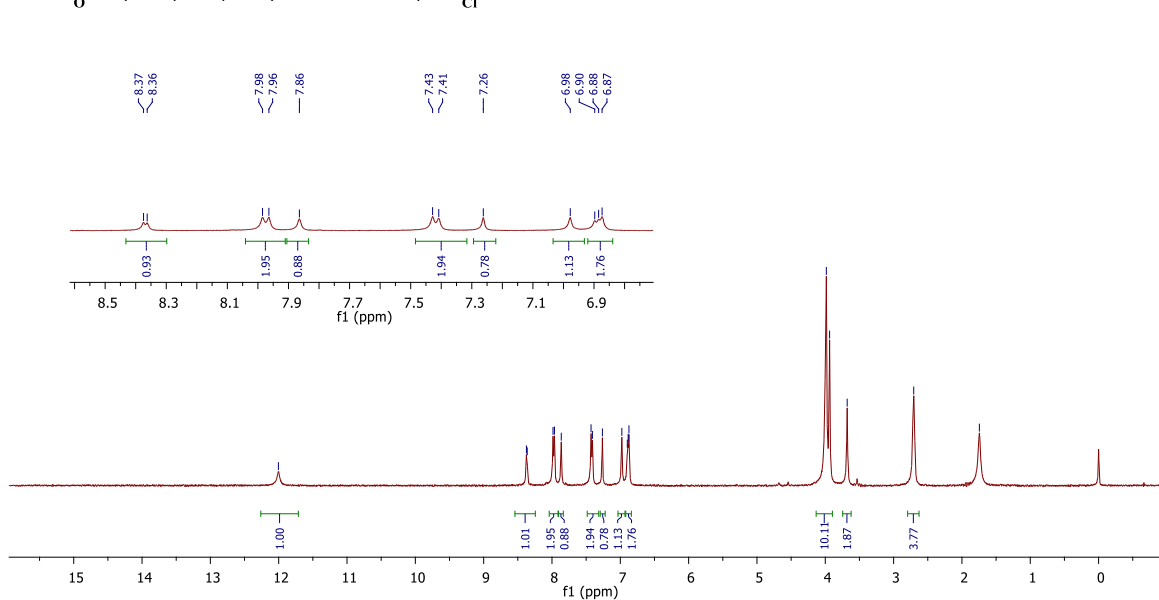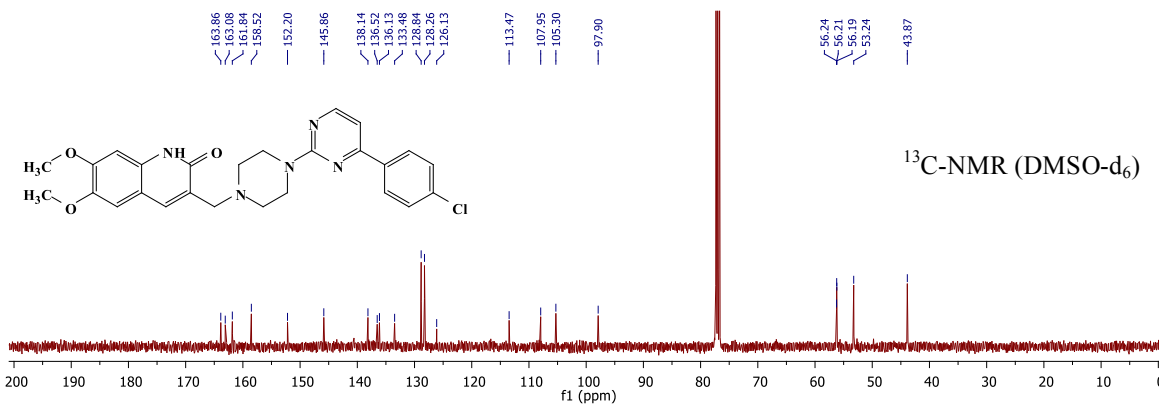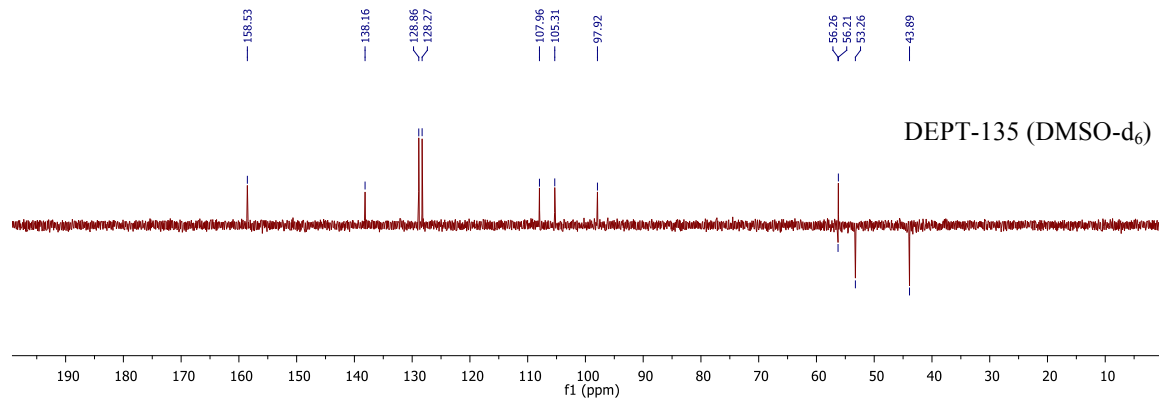

# Compound-13b

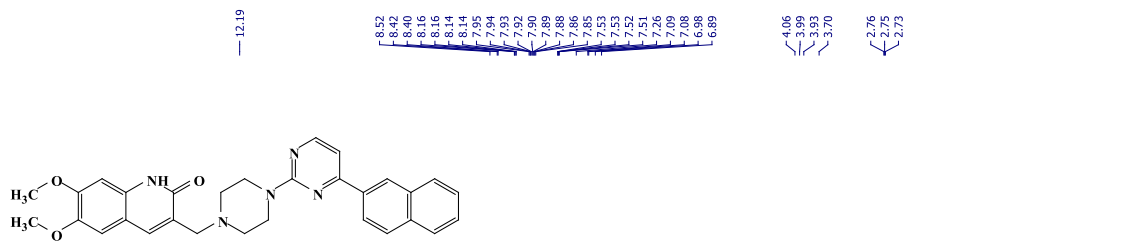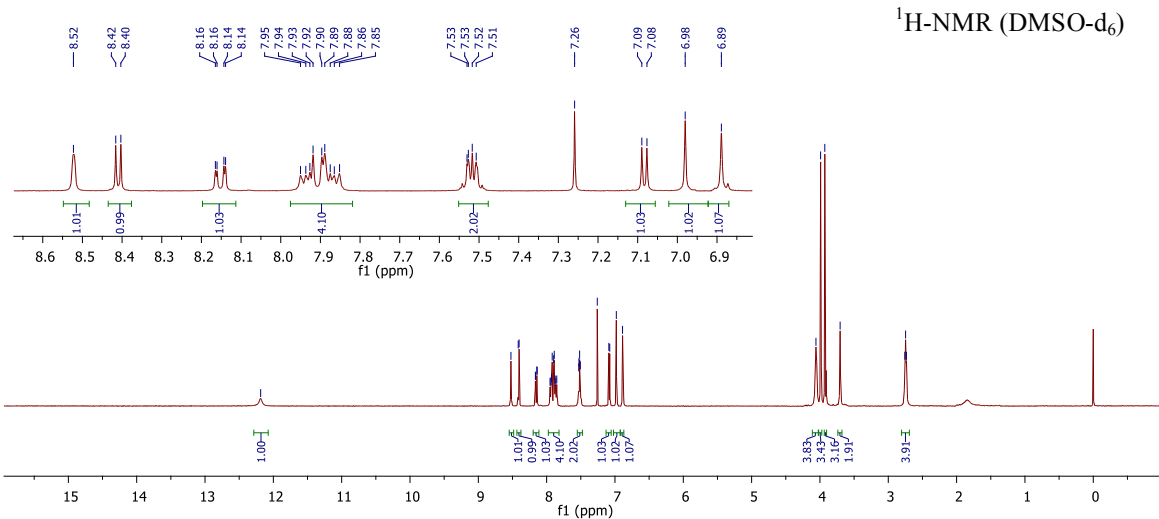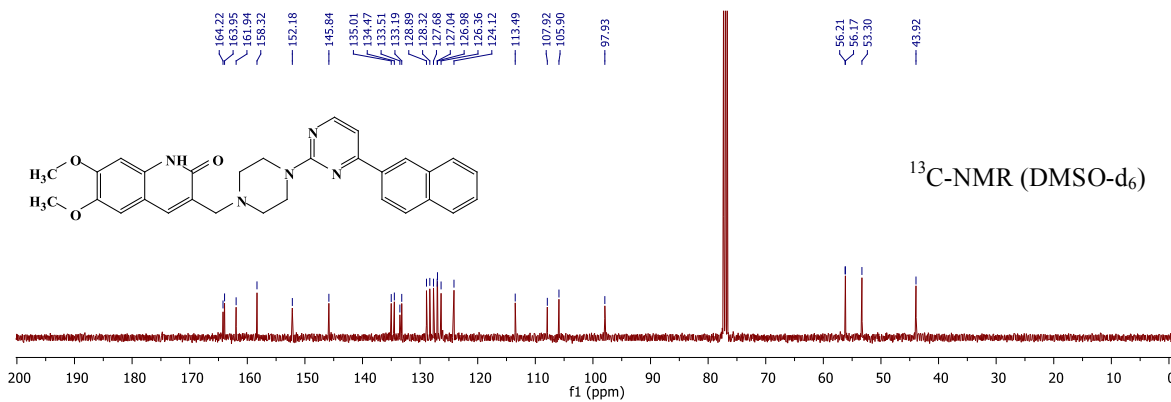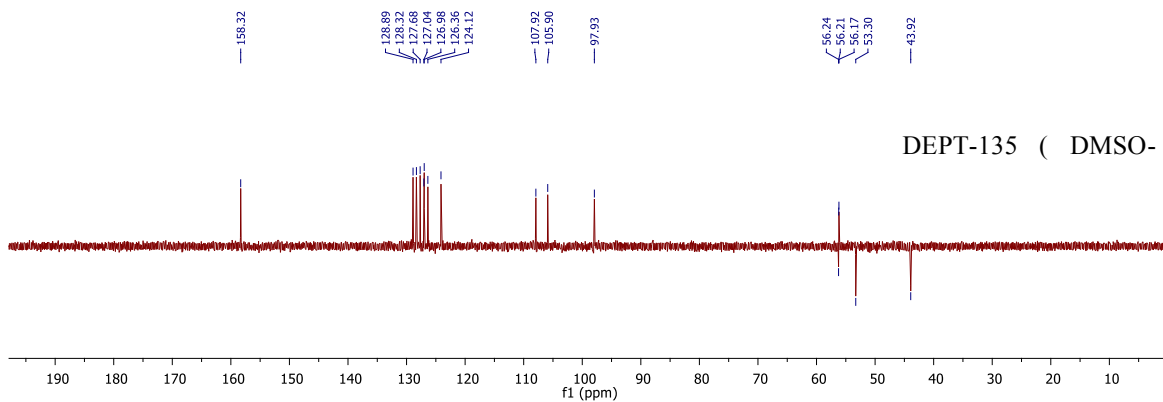

Compound-14a

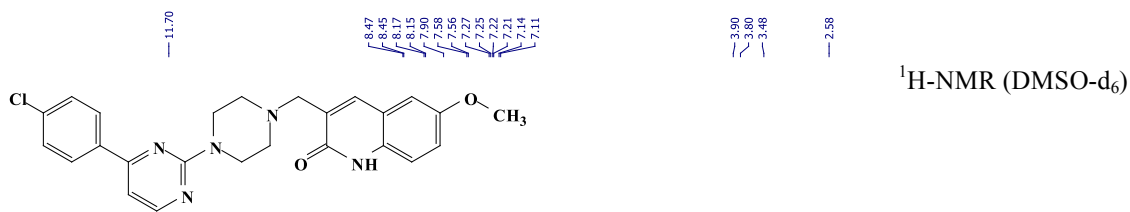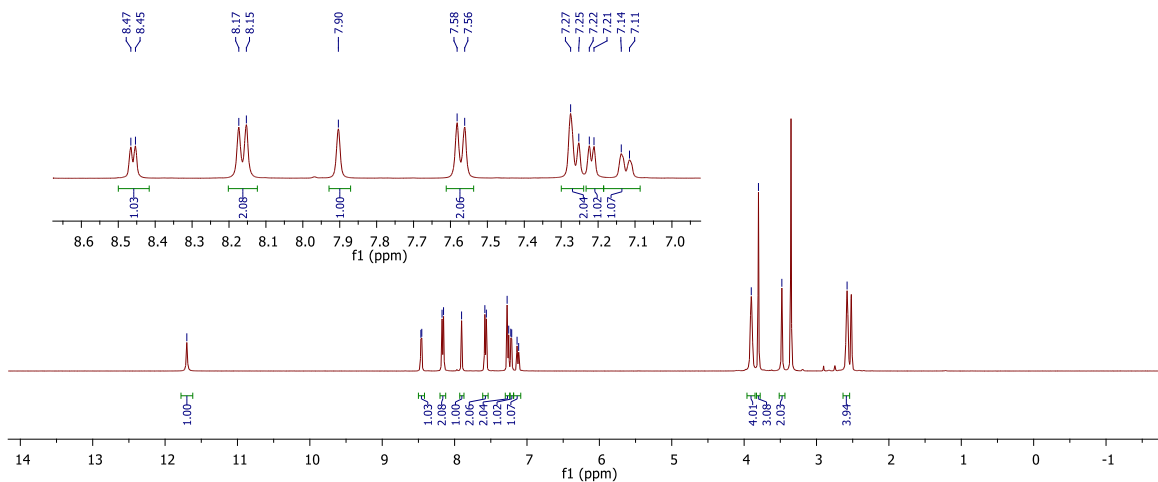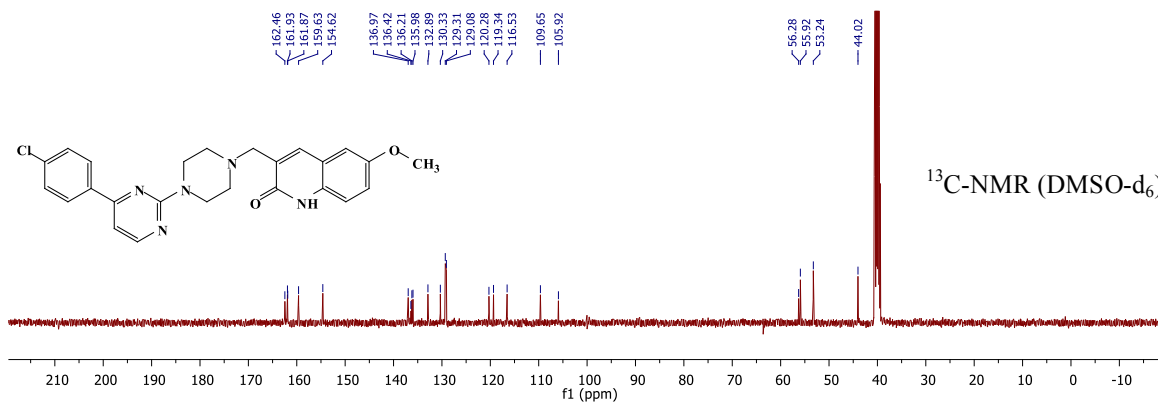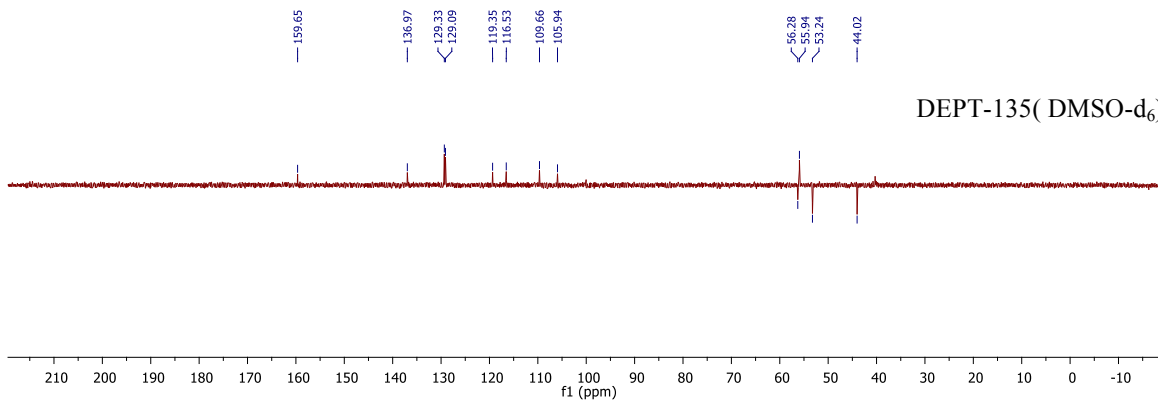



**Compound-14b**

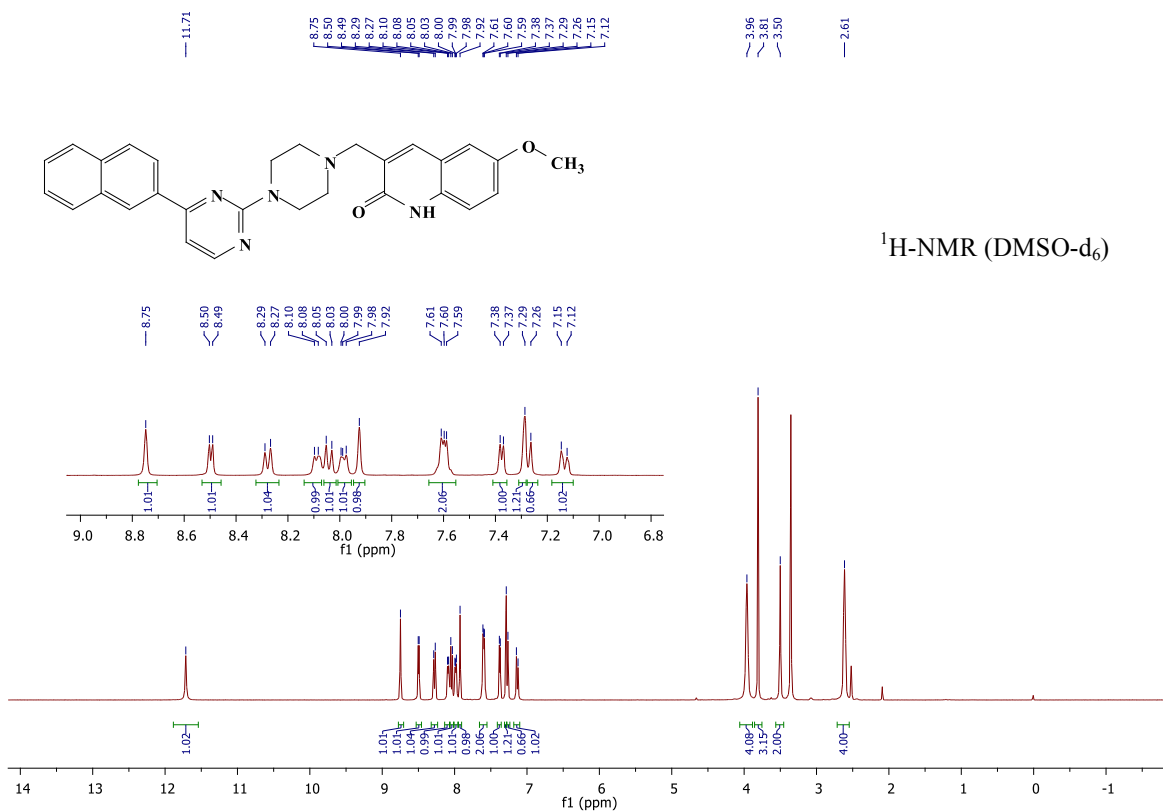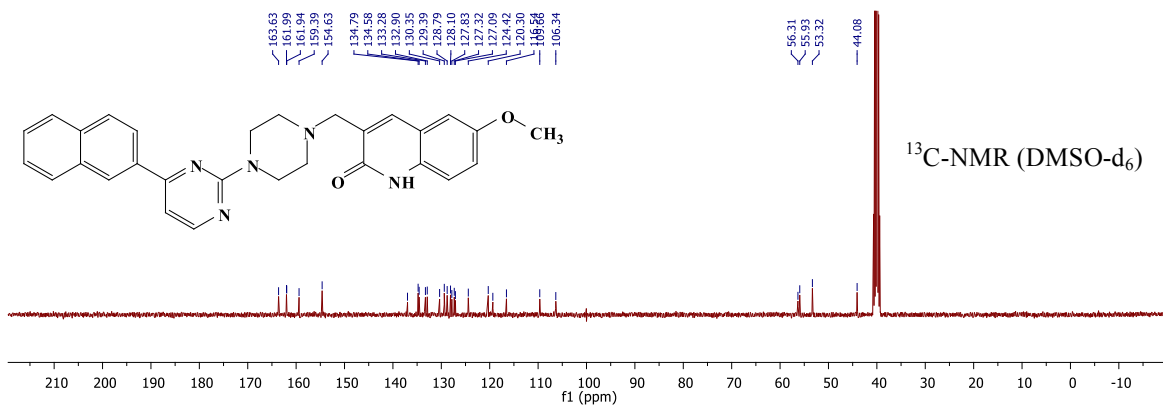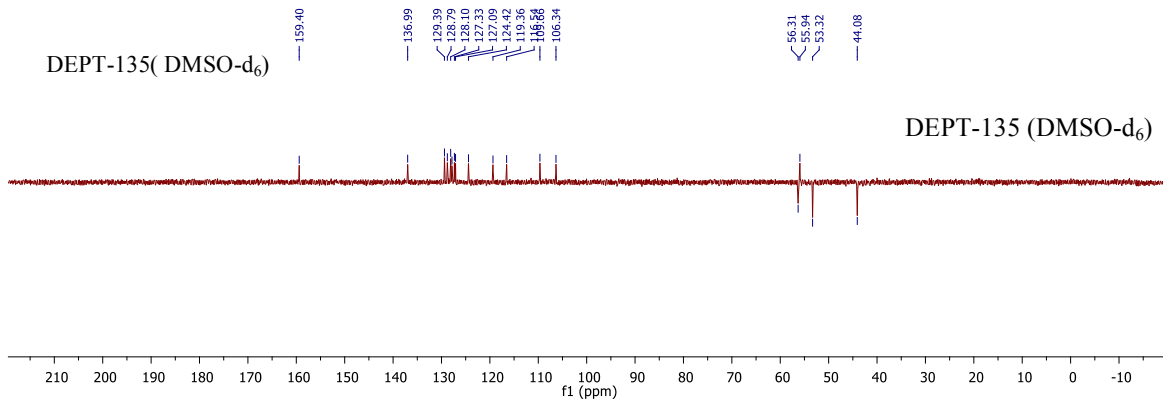

**Compound-15a**

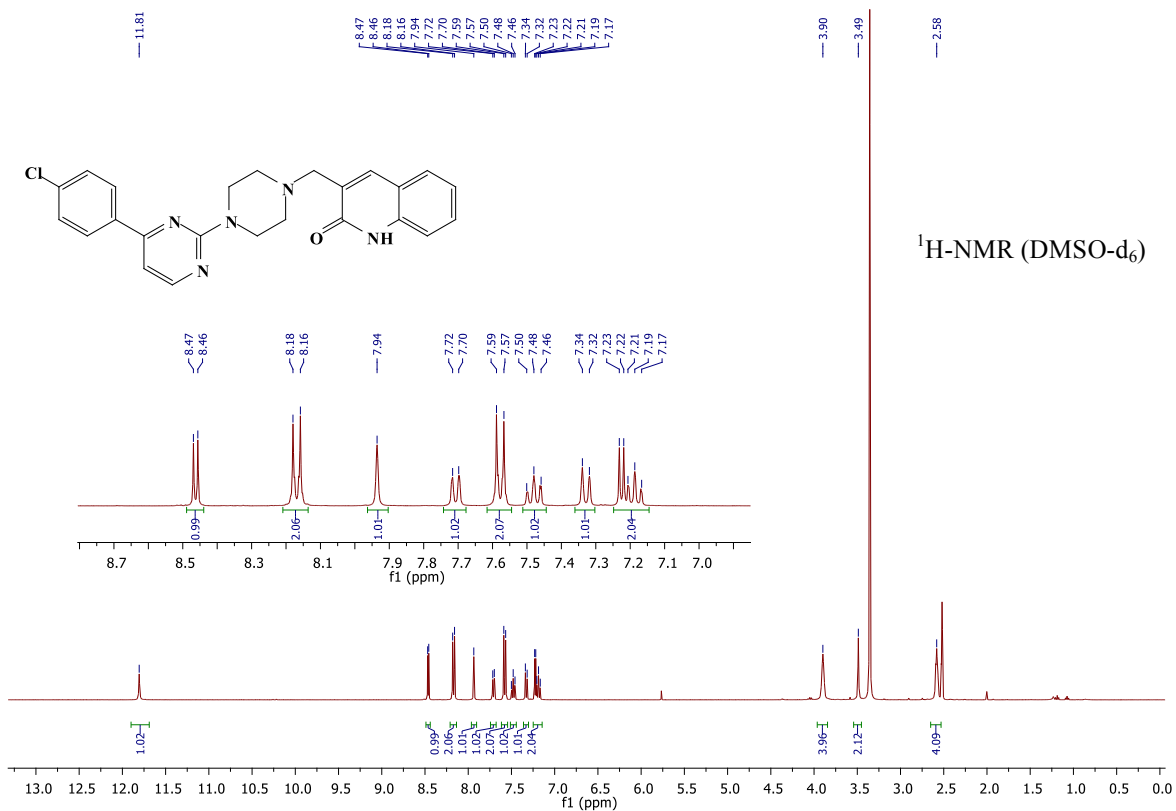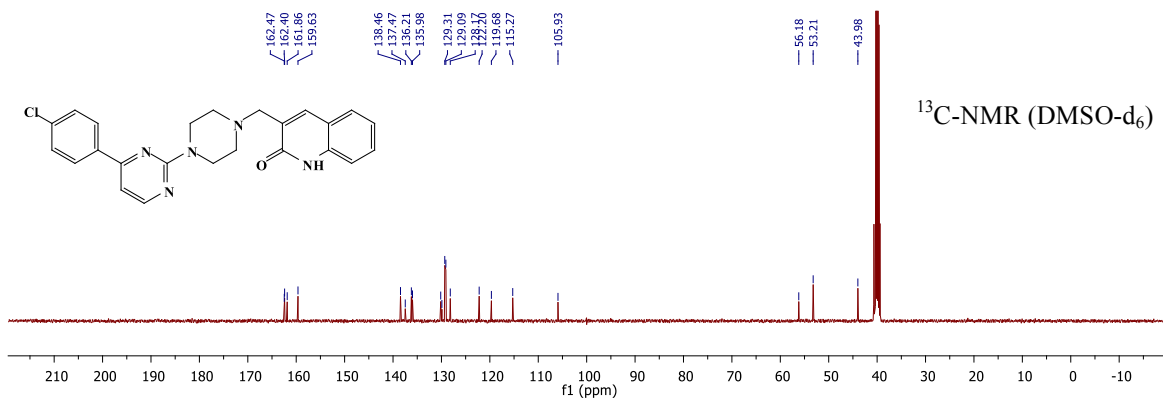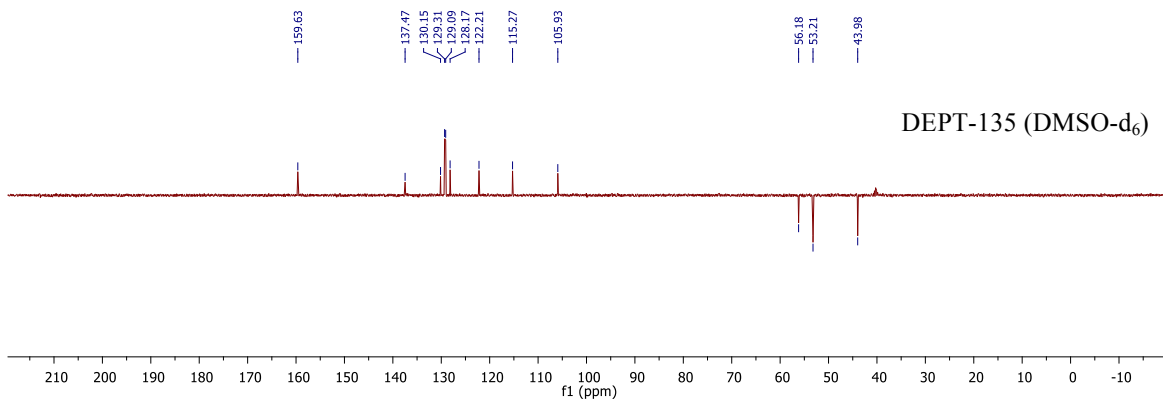

# Compound-15b

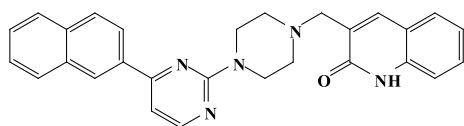

<sup>1</sup>H-NMR (DMSO-d<sub>6</sub>)

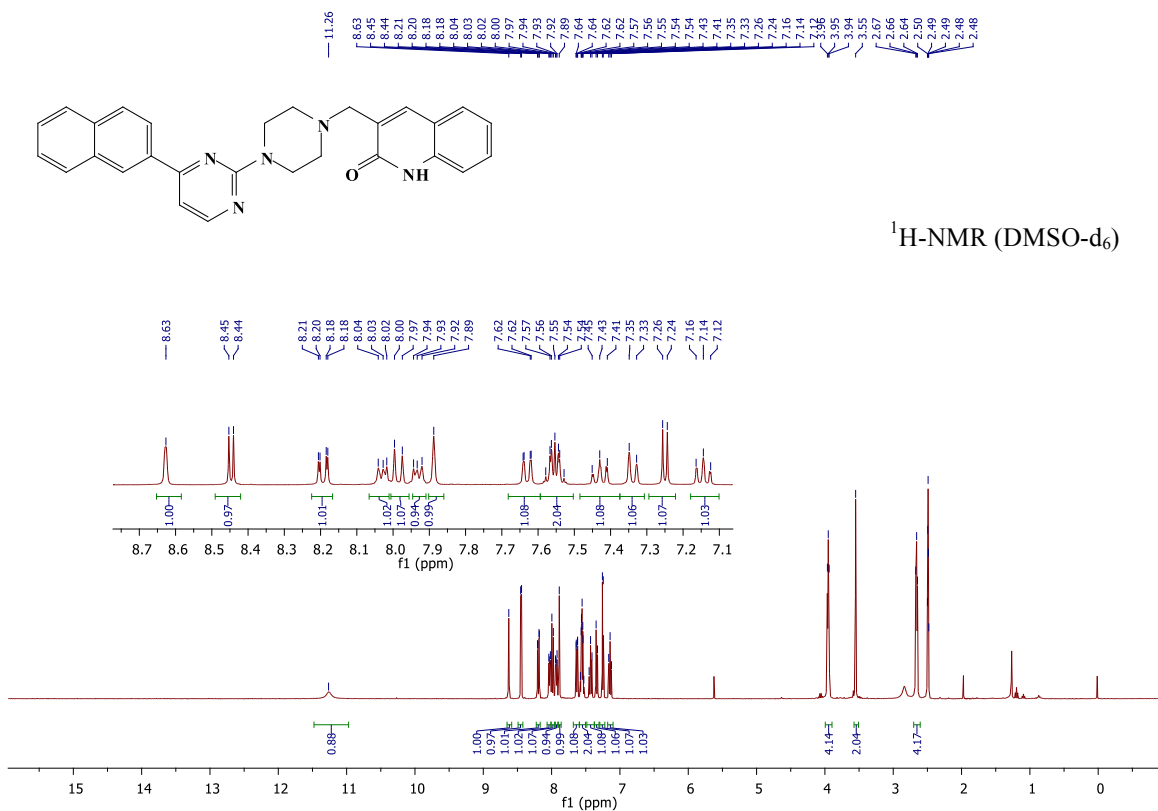

<sup>13</sup>C-NMR (DMSO-d<sub>6</sub>)

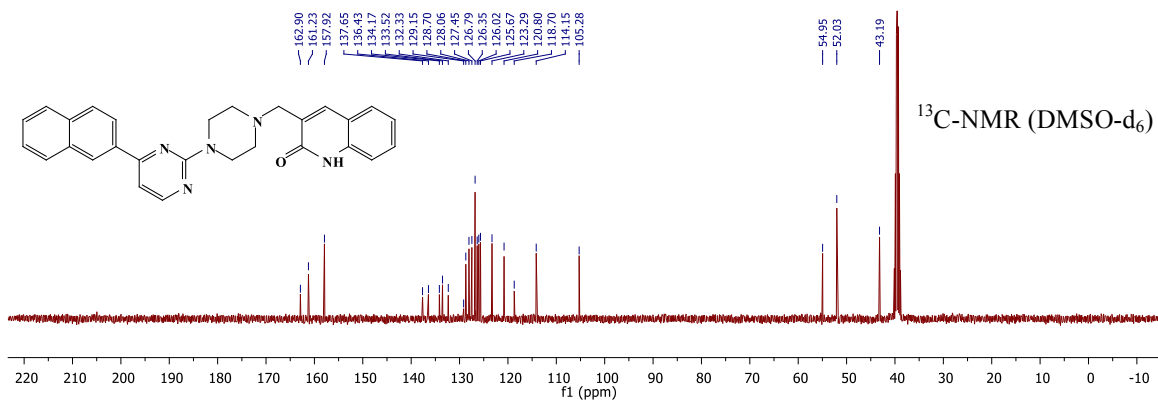

DEPT-135 (DMSO-d<sub>6</sub>)

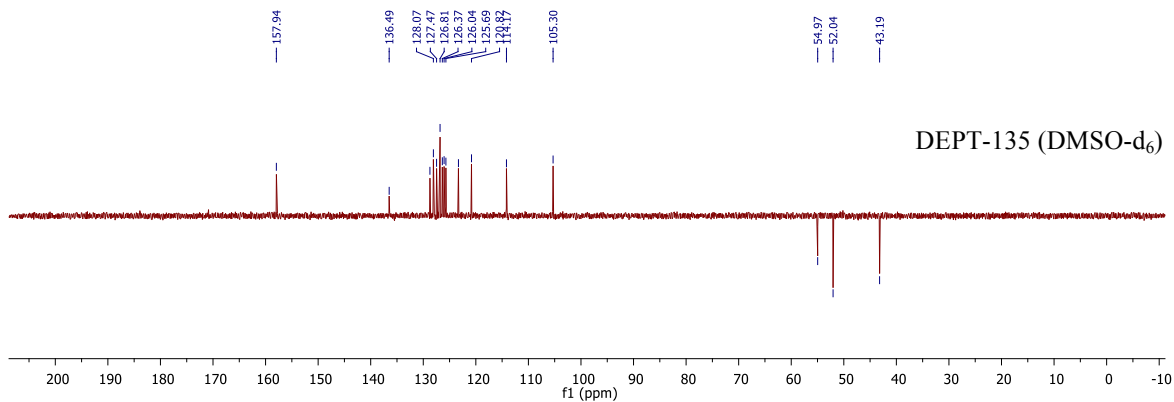

# Compound-16a

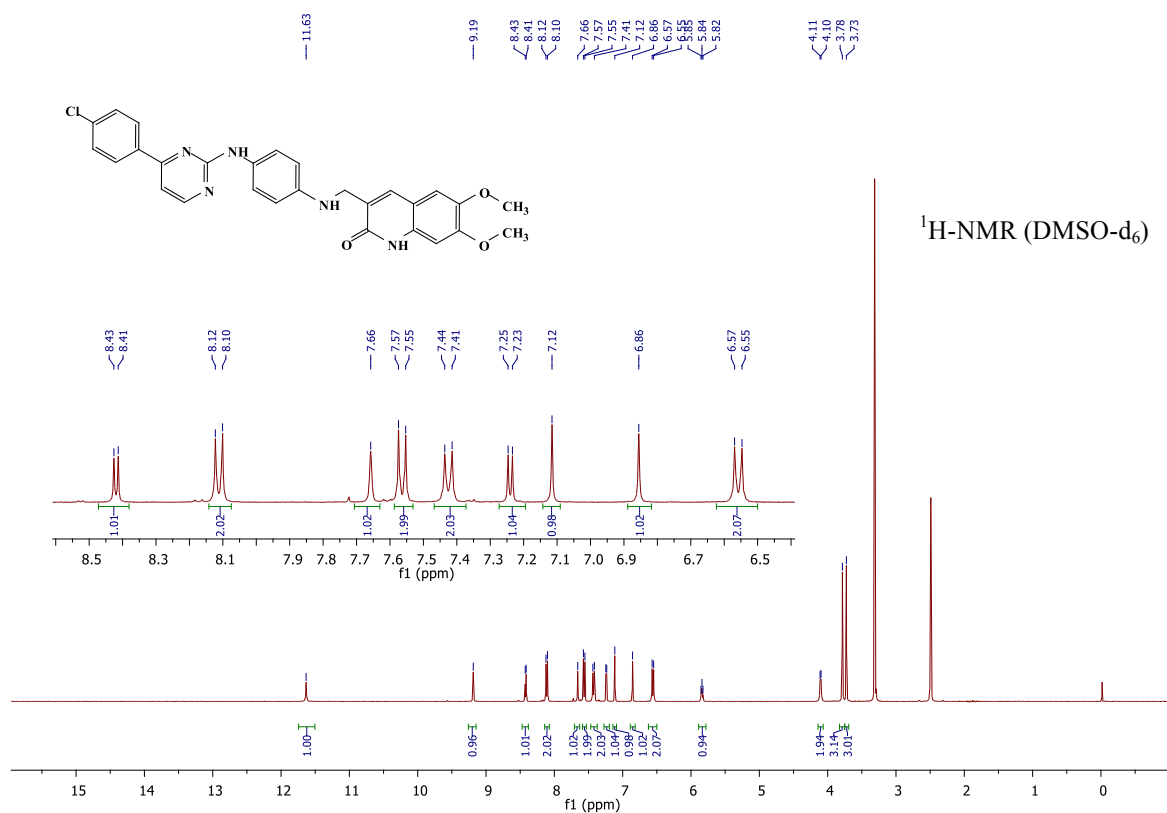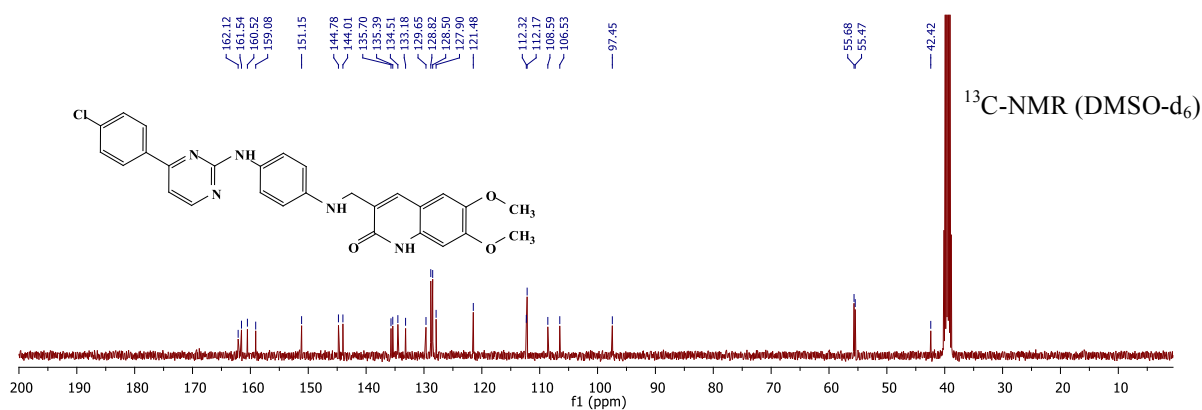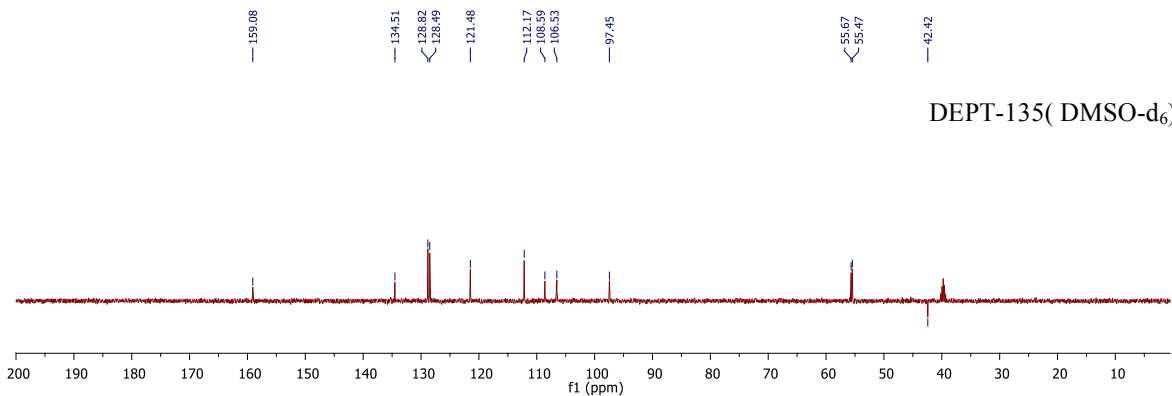

Compound-16b

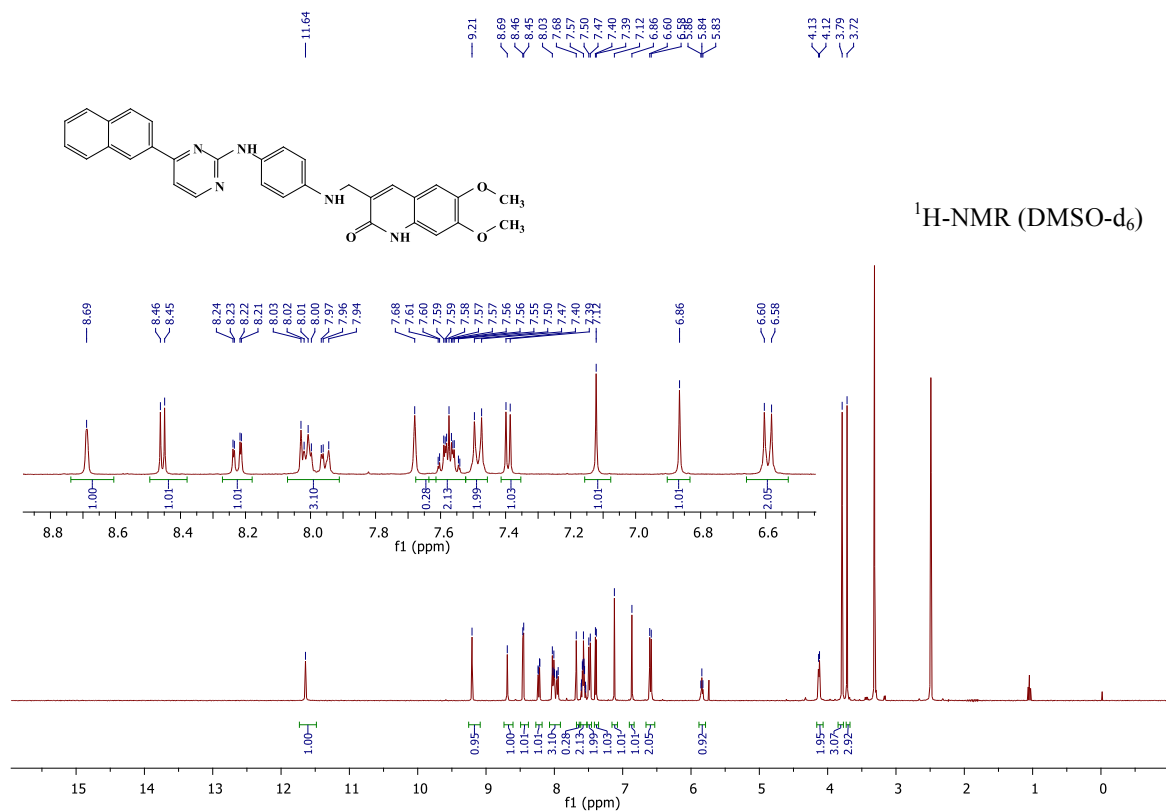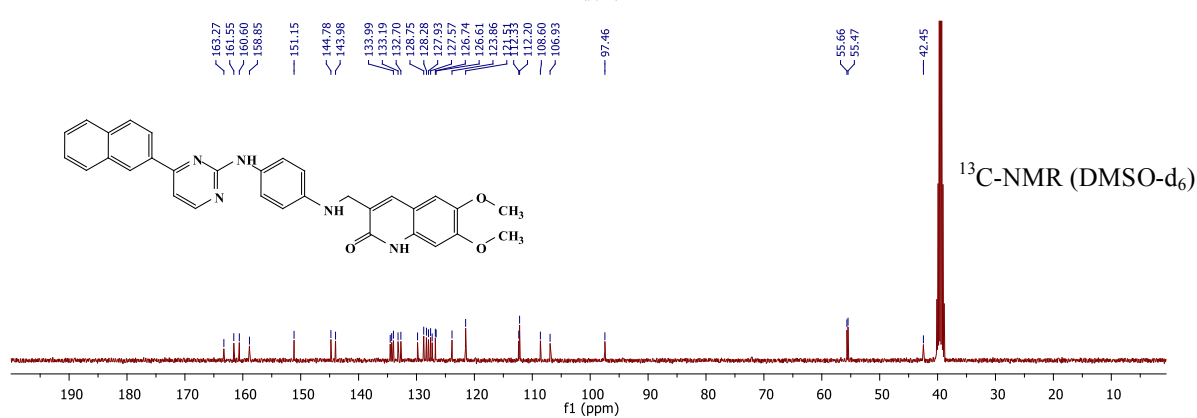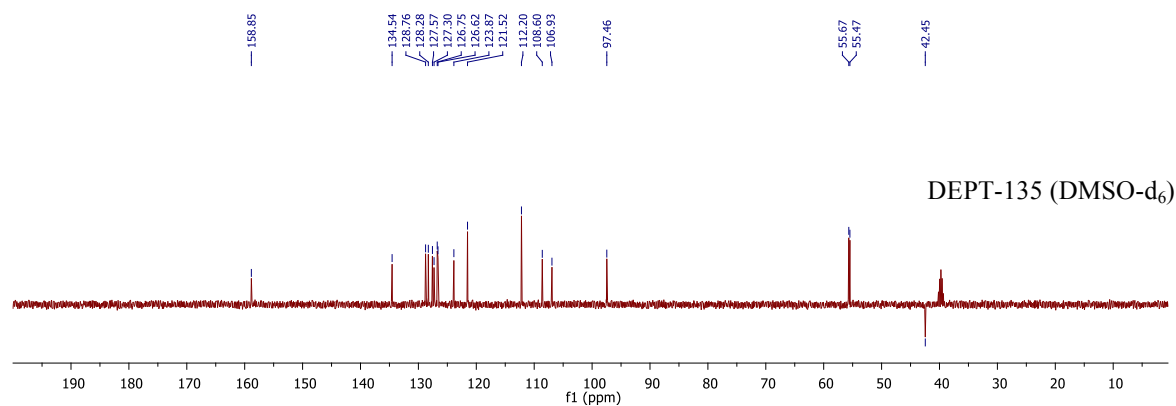

**Compound-17a**

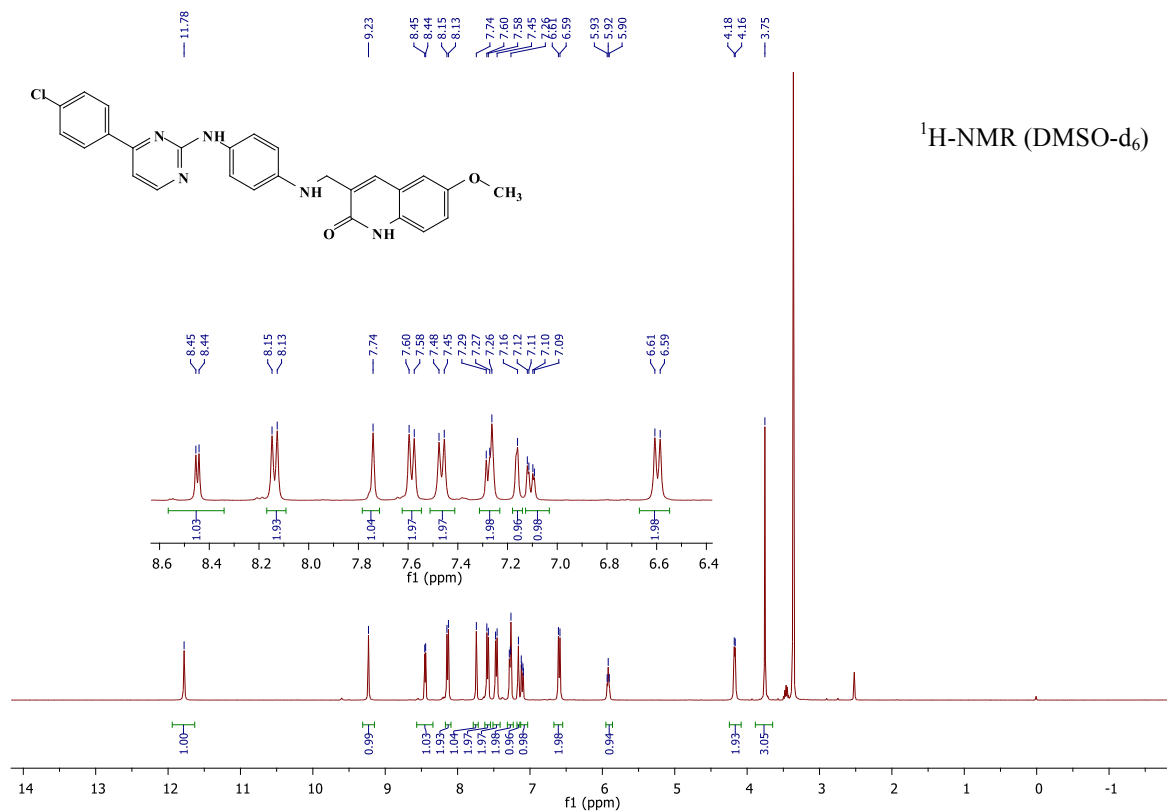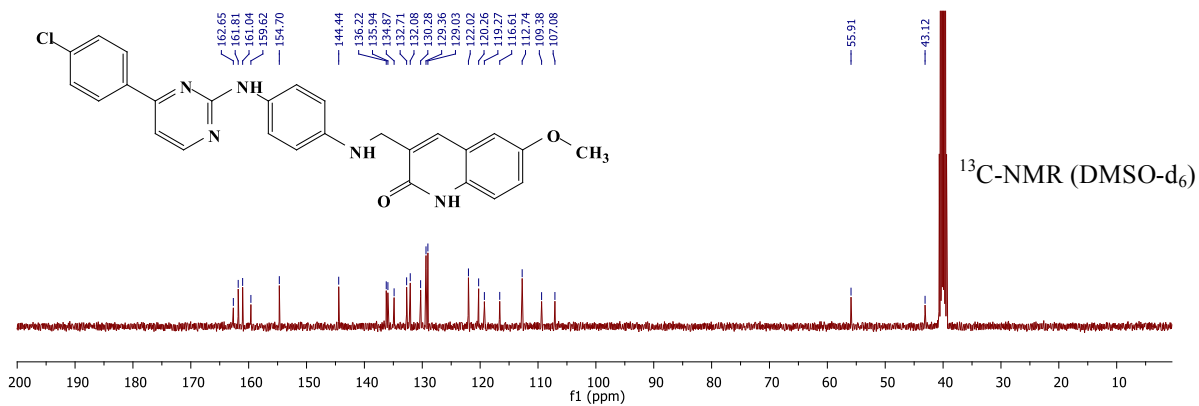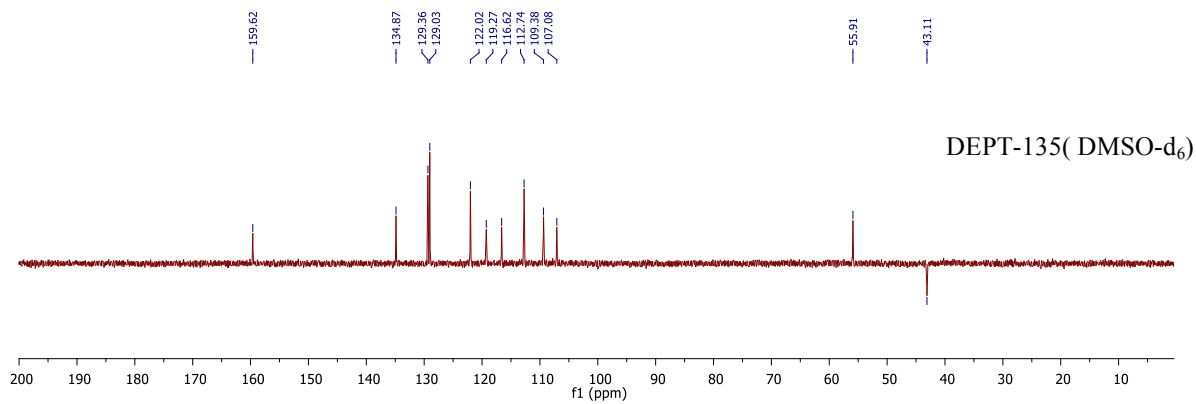

# Compound-17b

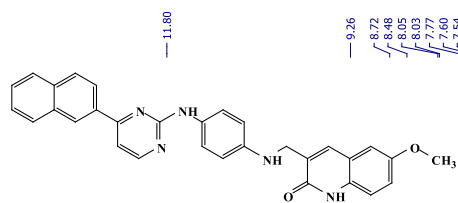

<sup>1</sup>H-NMR (DMSO-d<sub>6</sub>)

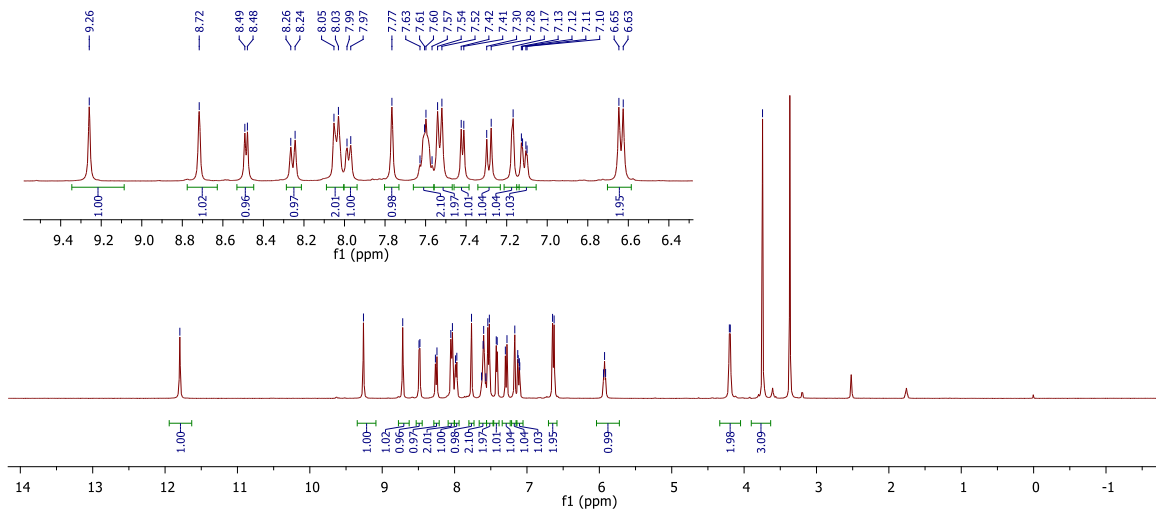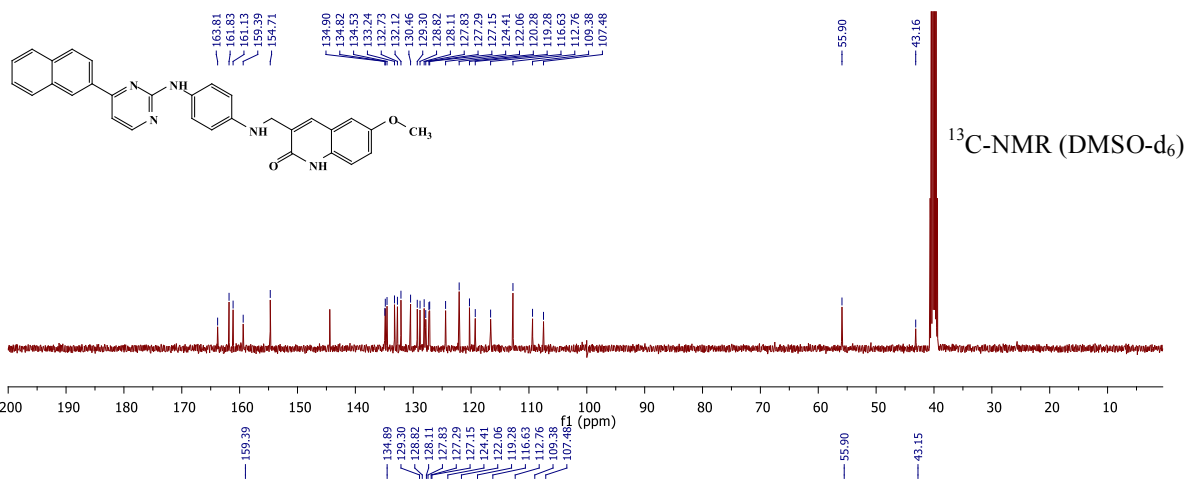

DEPT-135 (DMSO-d<sub>6</sub>)

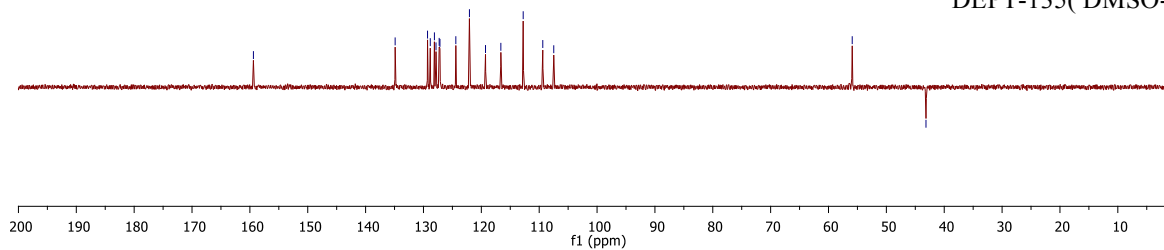

Compound-18a

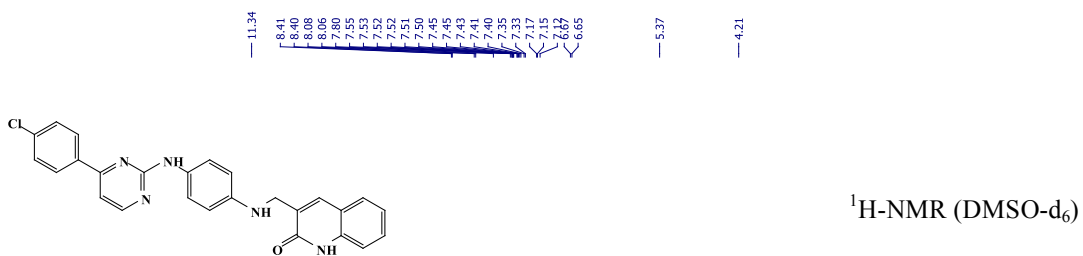

<sup>1</sup>H-NMR (DMSO-d<sub>6</sub>)

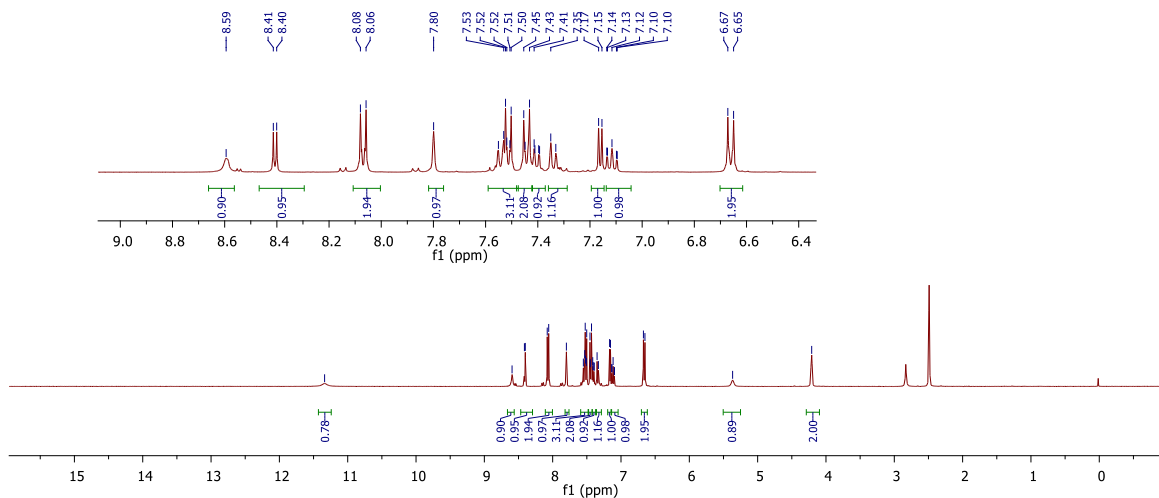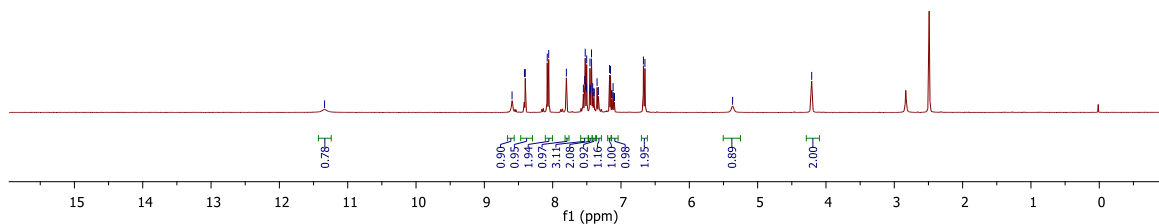

<sup>13</sup>C-NMR (DMSO-d<sub>6</sub>)

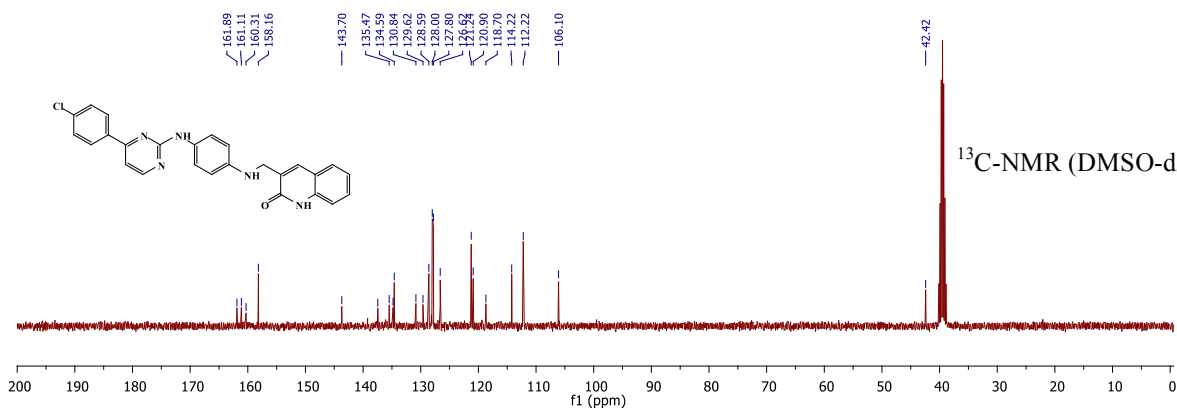

DEPT-135 (DMSO-d<sub>6</sub>)

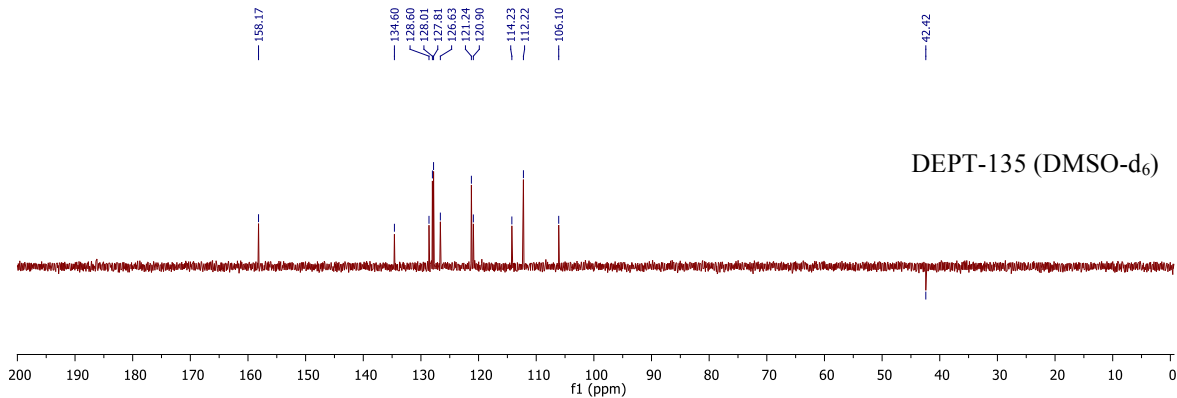



**Compound-18b**

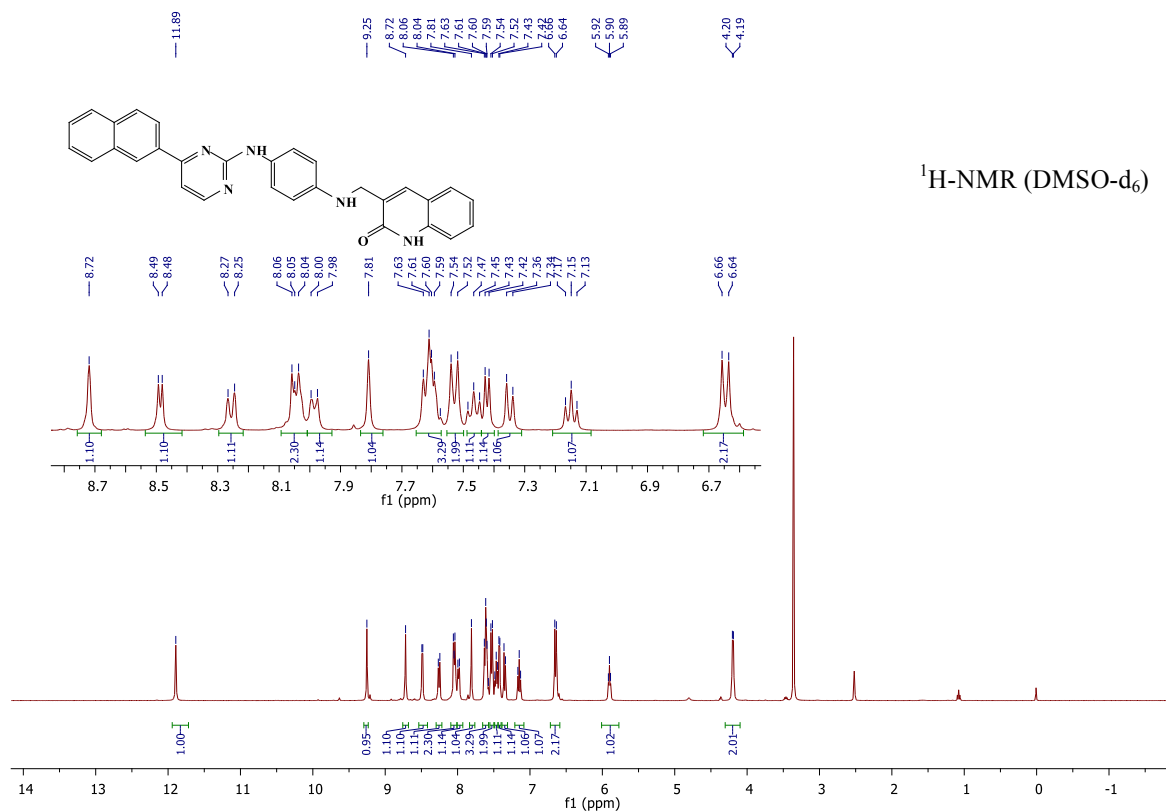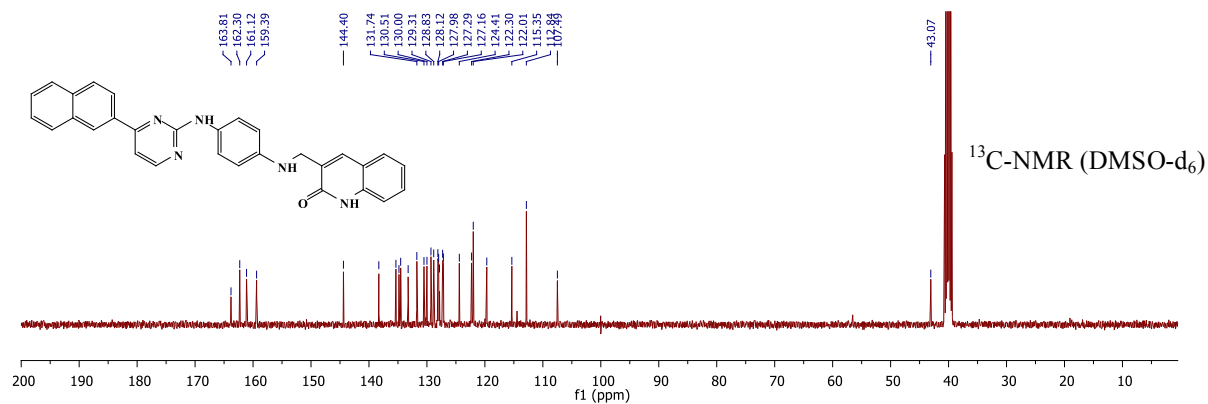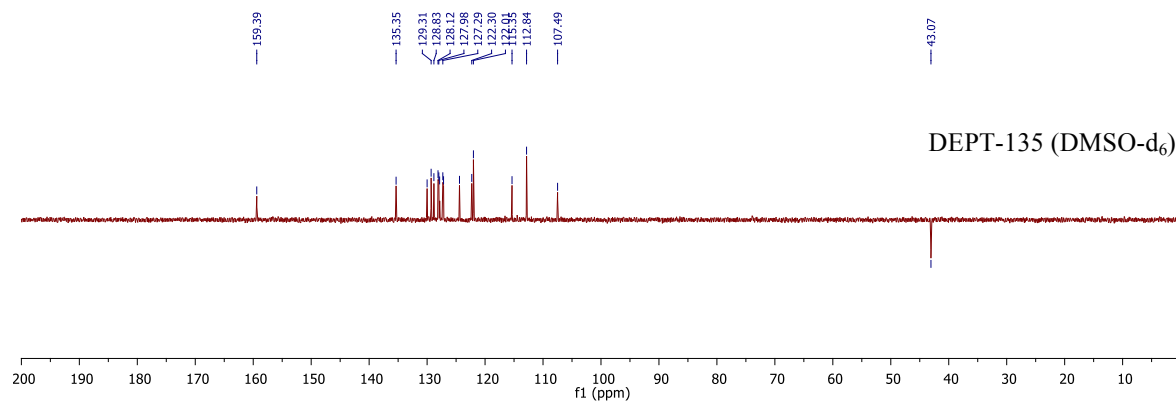

# Compound-19b

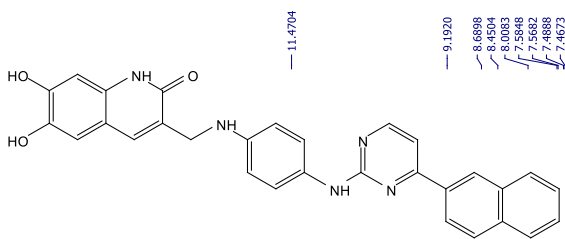

<sup>1</sup>H-NMR (DMSO-d<sub>6</sub>)

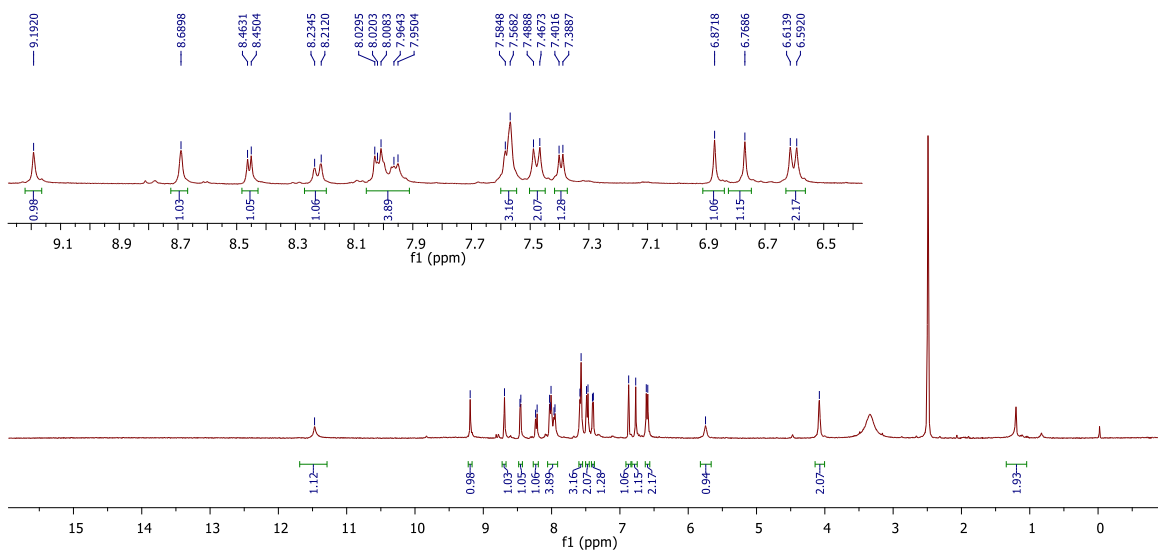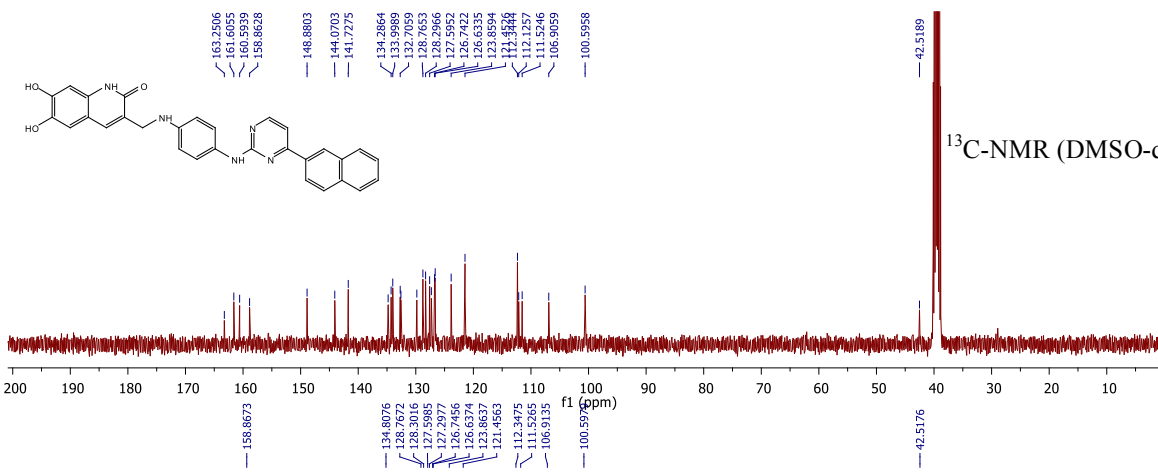

<sup>13</sup>C-NMR (DMSO-d<sub>6</sub>)

DEPT-135 (DMSO-d<sub>6</sub>)

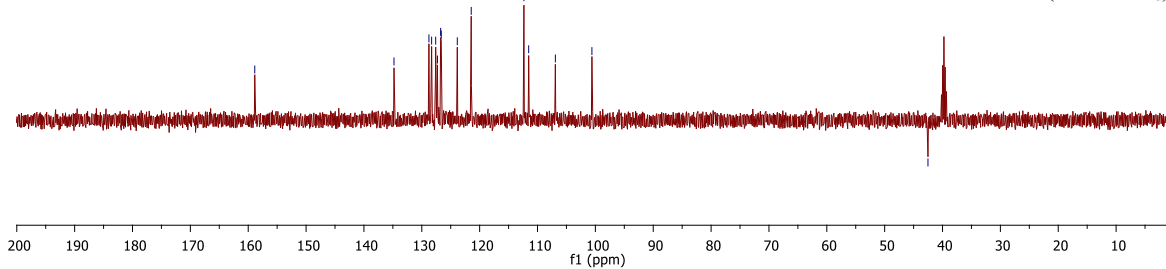

### Compound-3a

EI MS (70 eV):

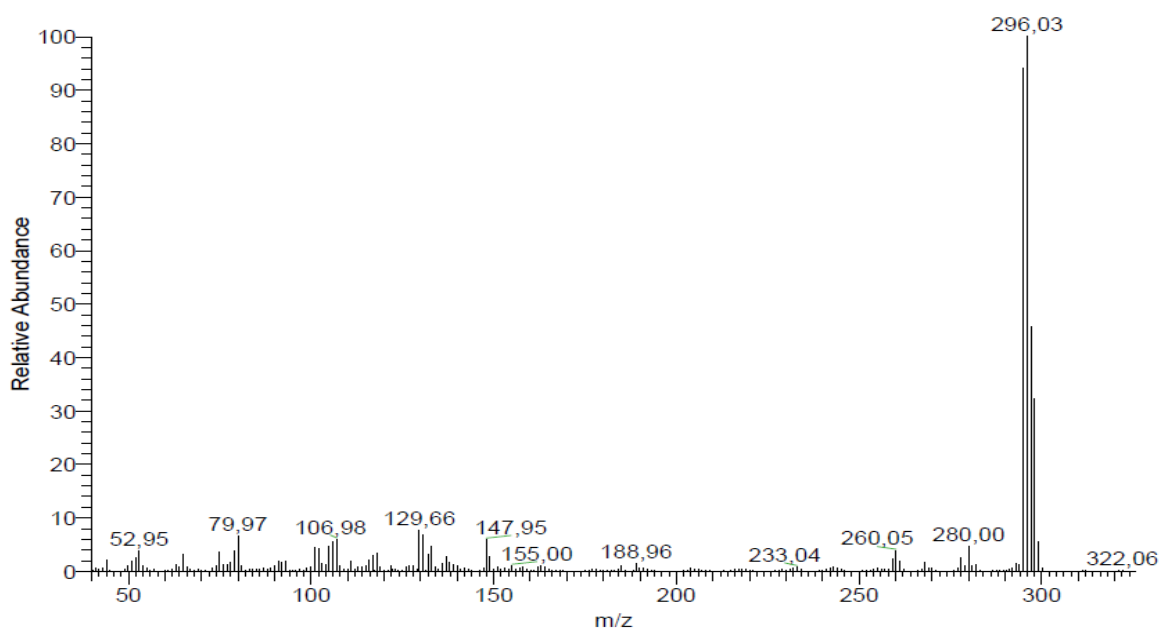

ESI-QTOF (positive ionization)

MS Zoomed Spectrum

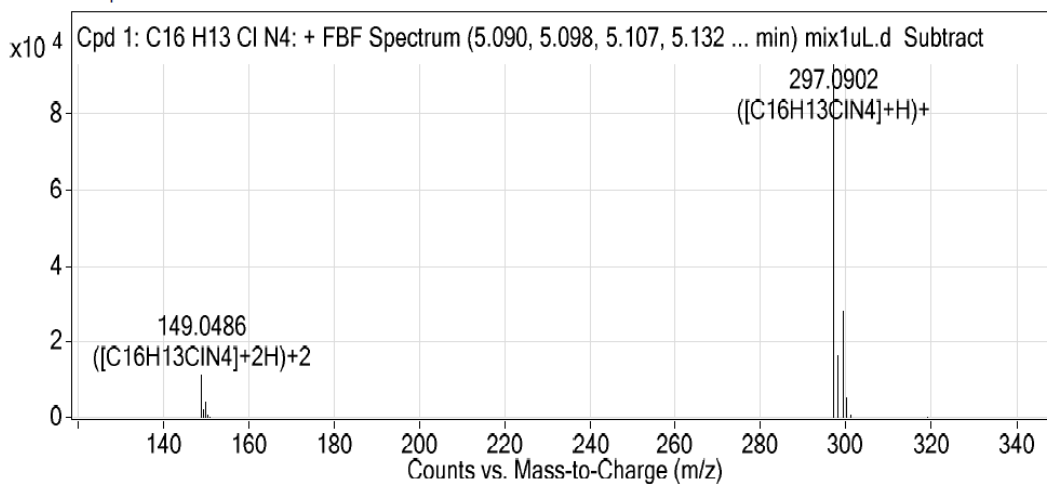

MS Spectrum Peak List

| m/z      | z | Abund    | Formula                                          | Ion                  |
|----------|---|----------|--------------------------------------------------|----------------------|
| 149.0486 | 2 | 11263.39 | C <sub>16</sub> H <sub>13</sub> CIN <sub>4</sub> | (M+2H) <sup>+2</sup> |
| 149.5497 | 2 | 2081.65  | C <sub>16</sub> H <sub>13</sub> CIN <sub>4</sub> | (M+2H) <sup>+2</sup> |
| 150.0472 | 2 | 3663.54  | C <sub>16</sub> H <sub>13</sub> CIN <sub>4</sub> | (M+2H) <sup>+2</sup> |
| 150.5486 | 2 | 692.96   | C <sub>16</sub> H <sub>13</sub> CIN <sub>4</sub> | (M+2H) <sup>+2</sup> |
| 297.0902 | 1 | 93136.22 | C <sub>16</sub> H <sub>13</sub> CIN <sub>4</sub> | (M+H) <sup>+</sup>   |
| 298.0928 | 1 | 16208.65 | C <sub>16</sub> H <sub>13</sub> CIN <sub>4</sub> | (M+H) <sup>+</sup>   |
| 299.0875 | 1 | 27865.41 | C <sub>16</sub> H <sub>13</sub> CIN <sub>4</sub> | (M+H) <sup>+</sup>   |
| 300.0904 | 1 | 5187.81  | C <sub>16</sub> H <sub>13</sub> CIN <sub>4</sub> | (M+H) <sup>+</sup>   |

### Compound-3b

EI MS (70 eV):

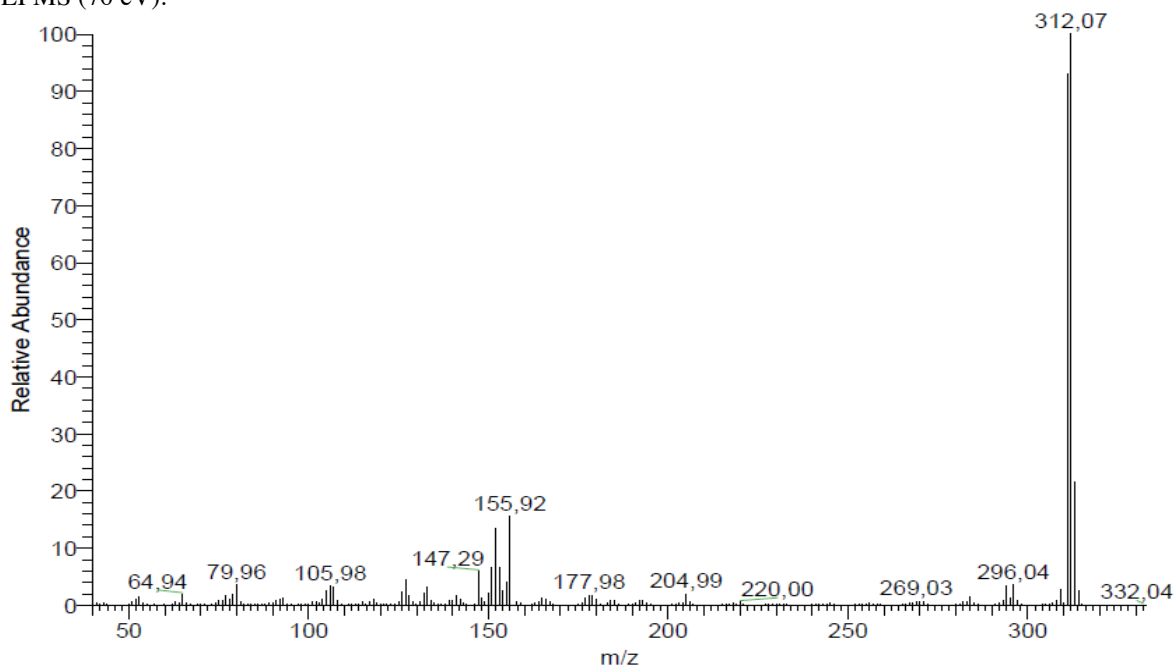

ESI-QTOF (positive ionization)

MS Zoomed Spectrum

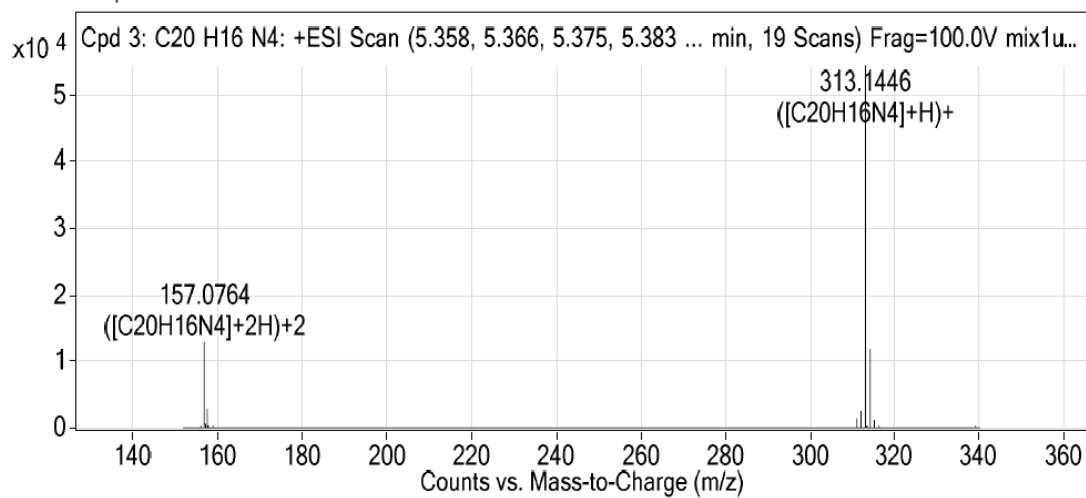

#### MS Spectrum Peak List

| m/z      | Calc m/z | Diff(ppm) | z | Abund    | Formula                                        | Ion      |
|----------|----------|-----------|---|----------|------------------------------------------------|----------|
| 157.0764 | 157.076  | -2.19     | 2 | 12568.78 | C <sub>20</sub> H <sub>16</sub> N <sub>4</sub> | (M+2H)+2 |
| 157.5776 | 157.5775 | -0.31     | 2 | 2819.89  | C <sub>20</sub> H <sub>16</sub> N <sub>4</sub> | (M+2H)+2 |
| 158.0793 | 158.079  | -2.13     | 2 | 444.36   | C <sub>20</sub> H <sub>16</sub> N <sub>4</sub> | (M+2H)+2 |
| 313.1446 | 313.1448 | 0.68      | 1 | 54342.16 | C <sub>20</sub> H <sub>16</sub> N <sub>4</sub> | (M+H)+   |
| 314.1476 | 314.1478 | 0.64      | 1 | 12099.22 | C <sub>20</sub> H <sub>16</sub> N <sub>4</sub> | (M+H)+   |
| 315.154  | 315.1507 | -10.28    | 1 | 1062.96  | C <sub>20</sub> H <sub>16</sub> N <sub>4</sub> | (M+H)+   |
| 316.1573 | 316.1537 | -11.58    | 1 | 174.2    | C <sub>20</sub> H <sub>16</sub> N <sub>4</sub> | (M+H)+   |
| 335.1268 | 335.1267 | -0.1      | 1 | 178.45   | C <sub>20</sub> H <sub>16</sub> N <sub>4</sub> | (M+Na)+  |

## Compound-4a

EI MS (70 eV):

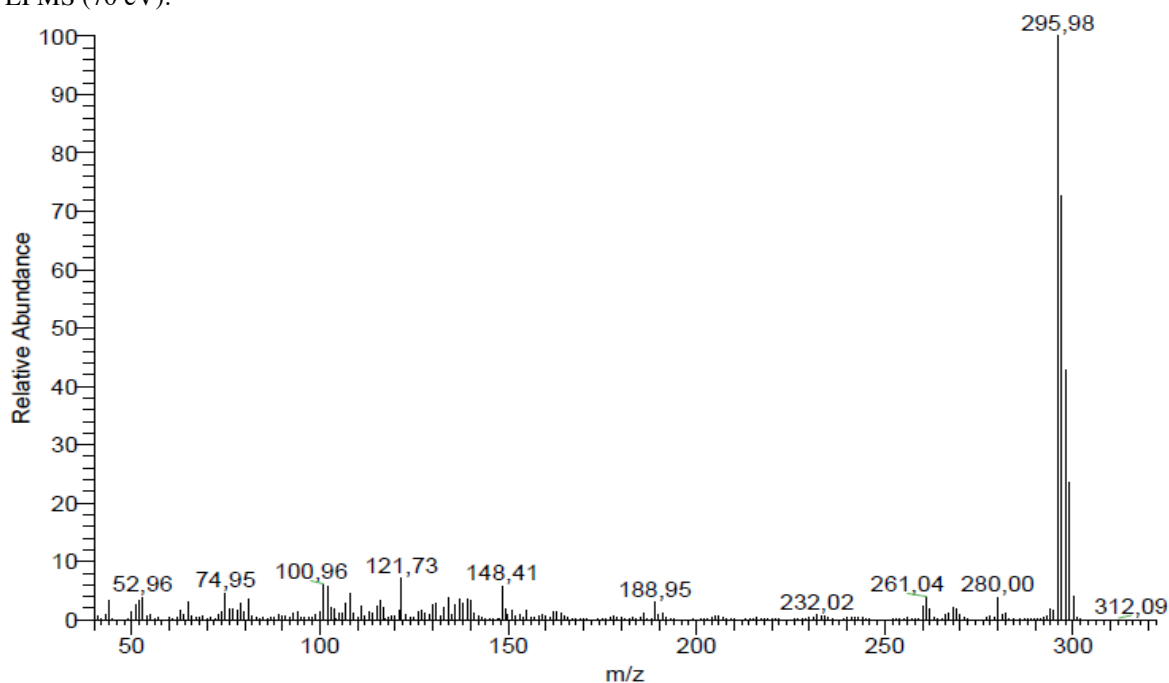

ESI-QTOF (positive ionization)

MS Zoomed Spectrum

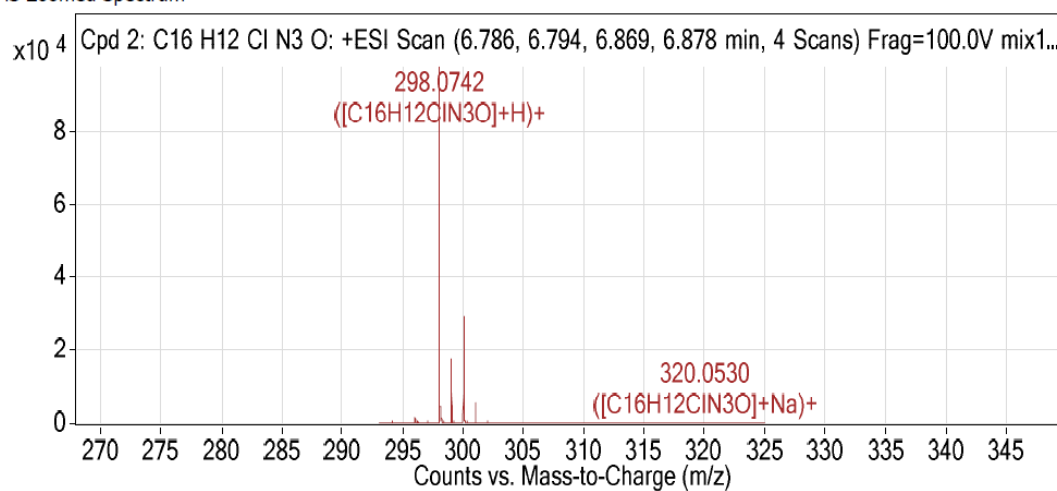

### MS Spectrum Peak List

| m/z      | Calc m/z | Diff(ppm) | z | Abund    | Formula                                            | Ion                 |
|----------|----------|-----------|---|----------|----------------------------------------------------|---------------------|
| 298.0742 | 298.0742 | -0.11     | 1 | 101744.8 | C <sub>16</sub> H <sub>12</sub> ClN <sub>3</sub> O | (M+H) <sup>+</sup>  |
| 299.0773 | 299.0772 | -0.41     | 1 | 17875.09 | C <sub>16</sub> H <sub>12</sub> ClN <sub>3</sub> O | (M+H) <sup>+</sup>  |
| 300.0718 | 300.0717 | -0.48     | 1 | 30274.79 | C <sub>16</sub> H <sub>12</sub> ClN <sub>3</sub> O | (M+H) <sup>+</sup>  |
| 301.0742 | 301.0744 | 0.8       | 1 | 5547.51  | C <sub>16</sub> H <sub>12</sub> ClN <sub>3</sub> O | (M+H) <sup>+</sup>  |
| 302.0764 | 302.0771 | 2.47      | 1 | 645.22   | C <sub>16</sub> H <sub>12</sub> ClN <sub>3</sub> O | (M+H) <sup>+</sup>  |
| 320.053  | 320.0561 | 9.64      | 1 | 159.12   | C <sub>16</sub> H <sub>12</sub> ClN <sub>3</sub> O | (M+Na) <sup>+</sup> |

## Compound-4b

EI MS (70 eV):

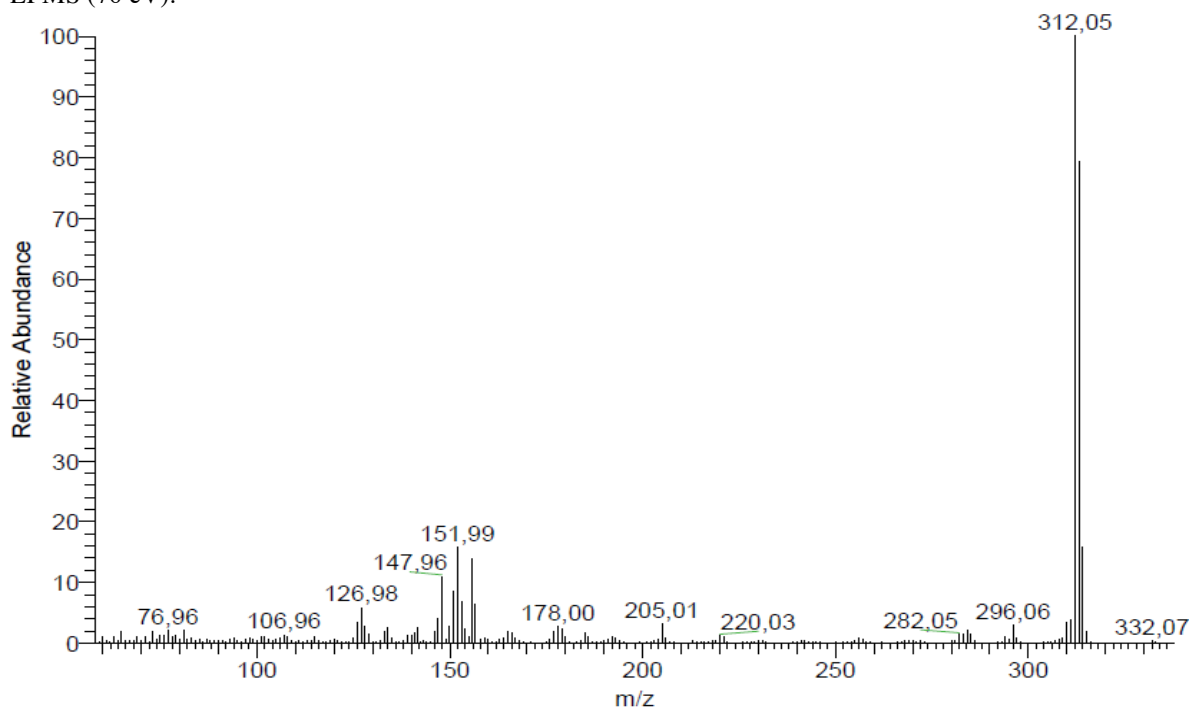

ESI-QTOF (positive ionization)

MS Zoomed Spectrum

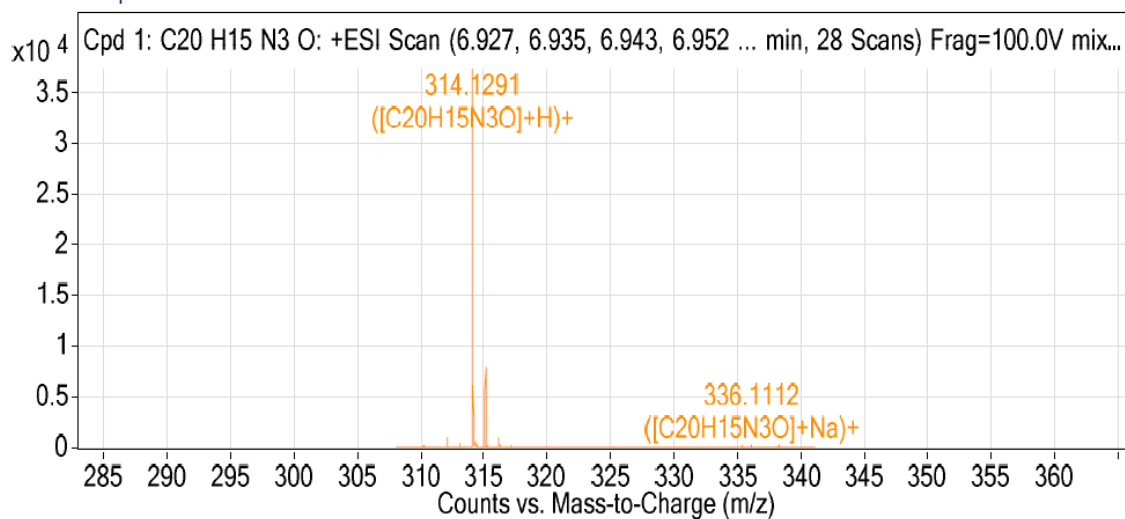

### MS Spectrum Peak List

| m/z      | Calc m/z | Diff(ppm) | z | Abund    | Formula                                          | Ion                 |
|----------|----------|-----------|---|----------|--------------------------------------------------|---------------------|
| 313.1161 | 313.121  | 15.54     | 1 | 118.96   | C <sub>20</sub> H <sub>15</sub> N <sub>3</sub> O | M+                  |
| 314.1291 | 314.1288 | -0.87     | 1 | 36679.08 | C <sub>20</sub> H <sub>15</sub> N <sub>3</sub> O | (M+H) <sup>+</sup>  |
| 315.1324 | 315.1319 | -1.54     | 1 | 8223.14  | C <sub>20</sub> H <sub>15</sub> N <sub>3</sub> O | (M+H) <sup>+</sup>  |
| 316.1358 | 316.1348 | -3.34     | 1 | 1034.97  | C <sub>20</sub> H <sub>15</sub> N <sub>3</sub> O | (M+H) <sup>+</sup>  |
| 317.1382 | 317.1376 | -1.97     | 1 | 66       | C <sub>20</sub> H <sub>15</sub> N <sub>3</sub> O | (M+H) <sup>+</sup>  |
| 336.1112 | 336.1107 | -1.31     | 1 | 60.07    | C <sub>20</sub> H <sub>15</sub> N <sub>3</sub> O | (M+Na) <sup>+</sup> |

### Compound-5a

EI MS (70 eV):

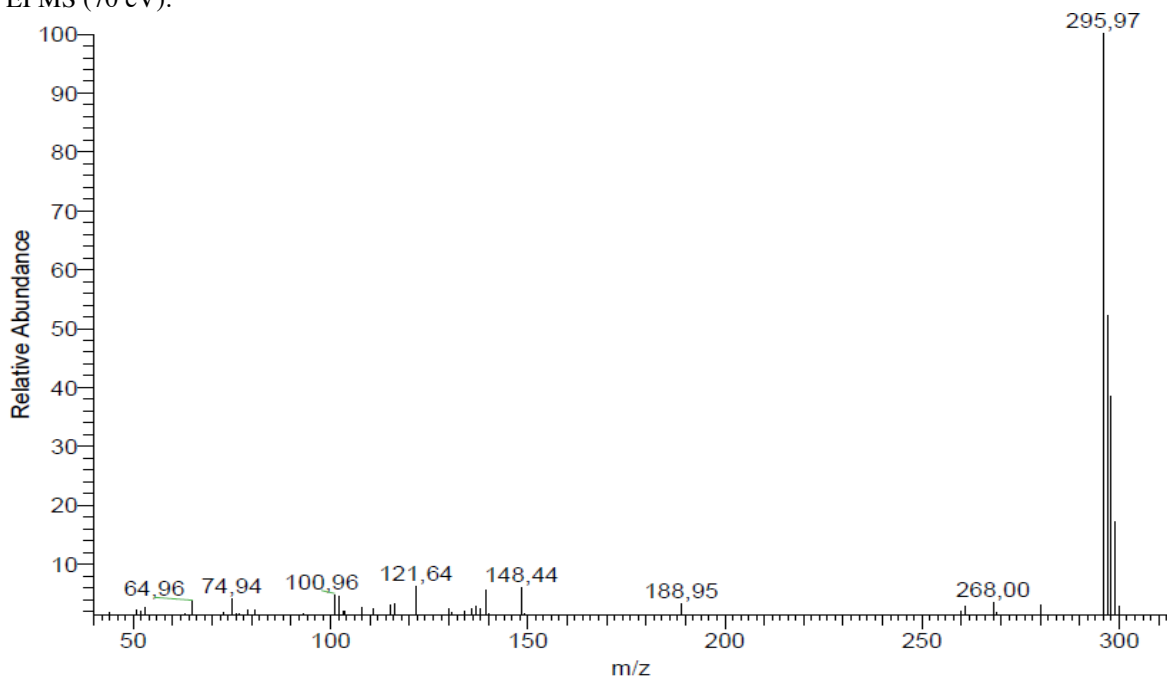

ESI-QTOF (positive ionization)

MS Zoomed Spectrum

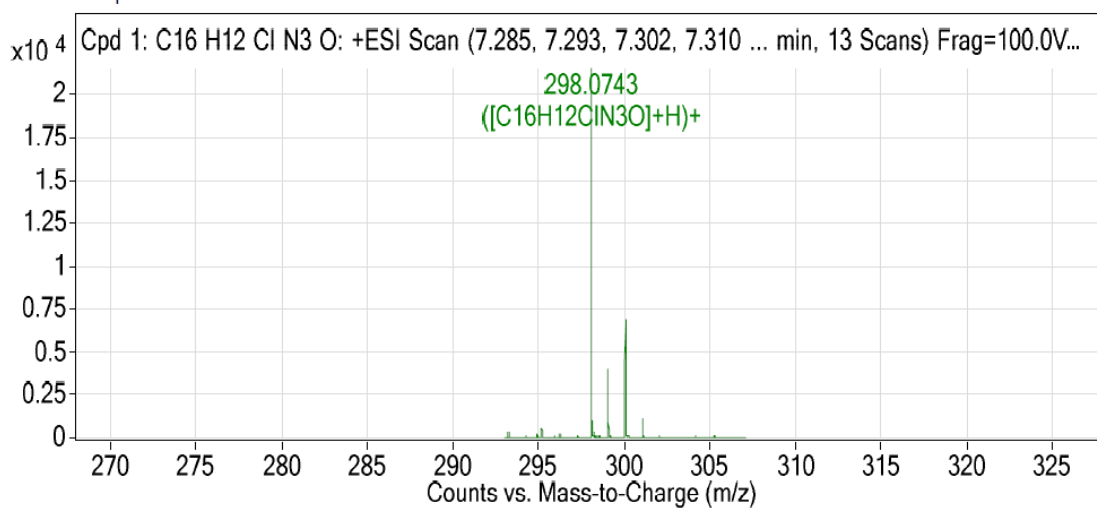

#### MS Spectrum Peak List

| m/z      | Calc m/z | Diff(ppm) | z | Abund    | Formula                                            | Ion                |
|----------|----------|-----------|---|----------|----------------------------------------------------|--------------------|
| 298.0743 | 298.0742 | -0.53     | 1 | 22391.09 | C <sub>16</sub> H <sub>12</sub> ClN <sub>3</sub> O | (M+H) <sup>+</sup> |
| 299.077  | 299.0772 | 0.42      | 1 | 4070.67  | C <sub>16</sub> H <sub>12</sub> ClN <sub>3</sub> O | (M+H) <sup>+</sup> |
| 300.0717 | 300.0717 | -0.18     | 1 | 7156.17  | C <sub>16</sub> H <sub>12</sub> ClN <sub>3</sub> O | (M+H) <sup>+</sup> |
| 301.0744 | 301.0744 | -0.15     | 1 | 1221.69  | C <sub>16</sub> H <sub>12</sub> ClN <sub>3</sub> O | (M+H) <sup>+</sup> |
| 302.0734 | 302.0771 | 12.35     | 1 | 77.33    | C <sub>16</sub> H <sub>12</sub> ClN <sub>3</sub> O | (M+H) <sup>+</sup> |

### Compound-5b

EI MS (70 eV):

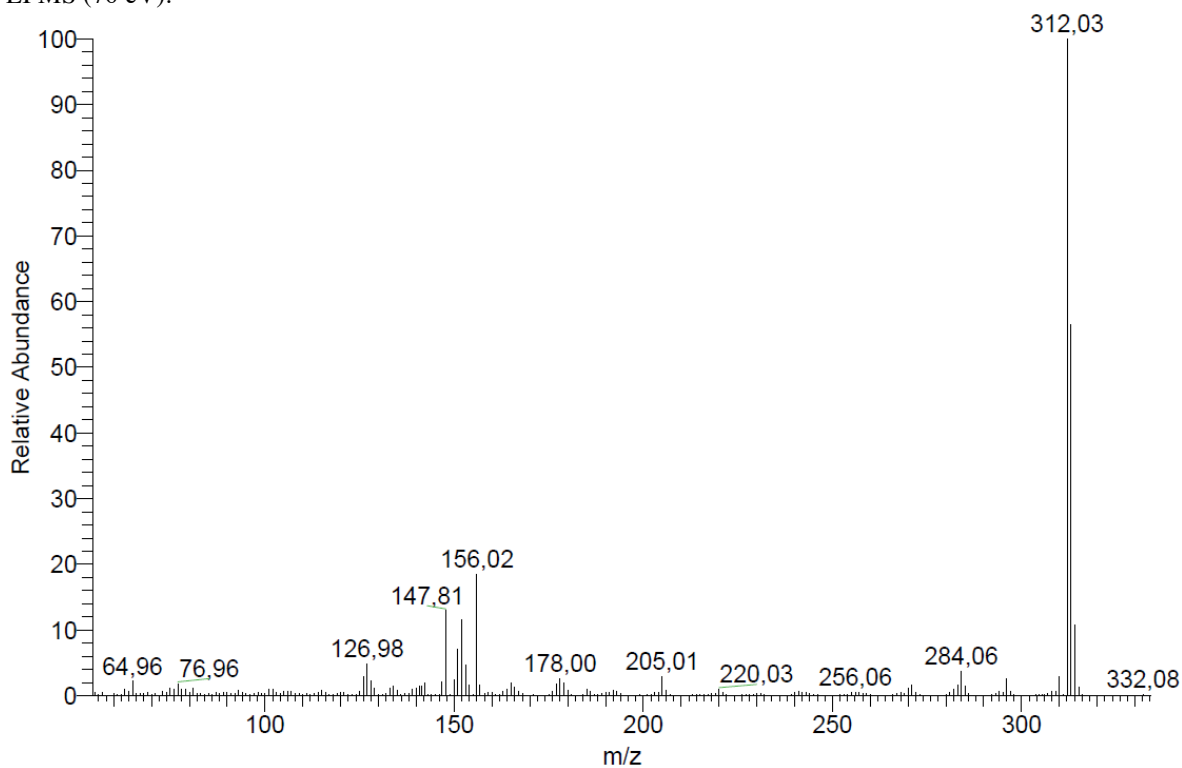

ESI-QTOF (positive ionization)

MS Zoomed Spectrum

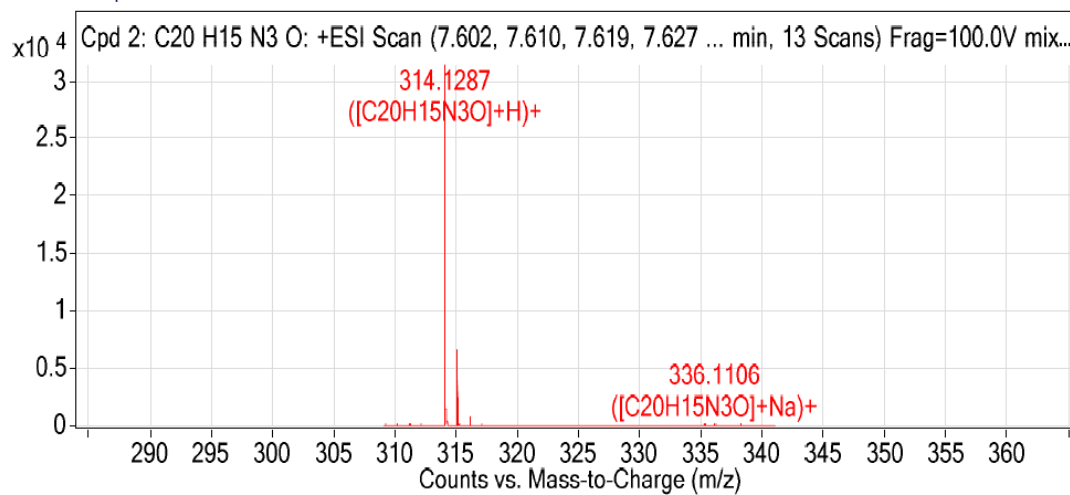

MS Spectrum Peak List

| m/z      | Calc m/z | Diff(ppm) | z | Abund    | Formula                                          | Ion                 |
|----------|----------|-----------|---|----------|--------------------------------------------------|---------------------|
| 314.1287 | 314.1288 | 0.17      | 1 | 31500.21 | C <sub>20</sub> H <sub>15</sub> N <sub>3</sub> O | (M+H) <sup>+</sup>  |
| 315.1323 | 315.1319 | -1.38     | 1 | 6980.97  | C <sub>20</sub> H <sub>15</sub> N <sub>3</sub> O | (M+H) <sup>+</sup>  |
| 316.1358 | 316.1348 | -3.22     | 1 | 817.01   | C <sub>20</sub> H <sub>15</sub> N <sub>3</sub> O | (M+H) <sup>+</sup>  |
| 317.1379 | 317.1376 | -1.05     | 1 | 63.34    | C <sub>20</sub> H <sub>15</sub> N <sub>3</sub> O | (M+H) <sup>+</sup>  |
| 336.1106 | 336.1107 | 0.33      | 1 | 108.92   | C <sub>20</sub> H <sub>15</sub> N <sub>3</sub> O | (M+Na) <sup>+</sup> |



## Compound-6a

EI MS (70 eV):

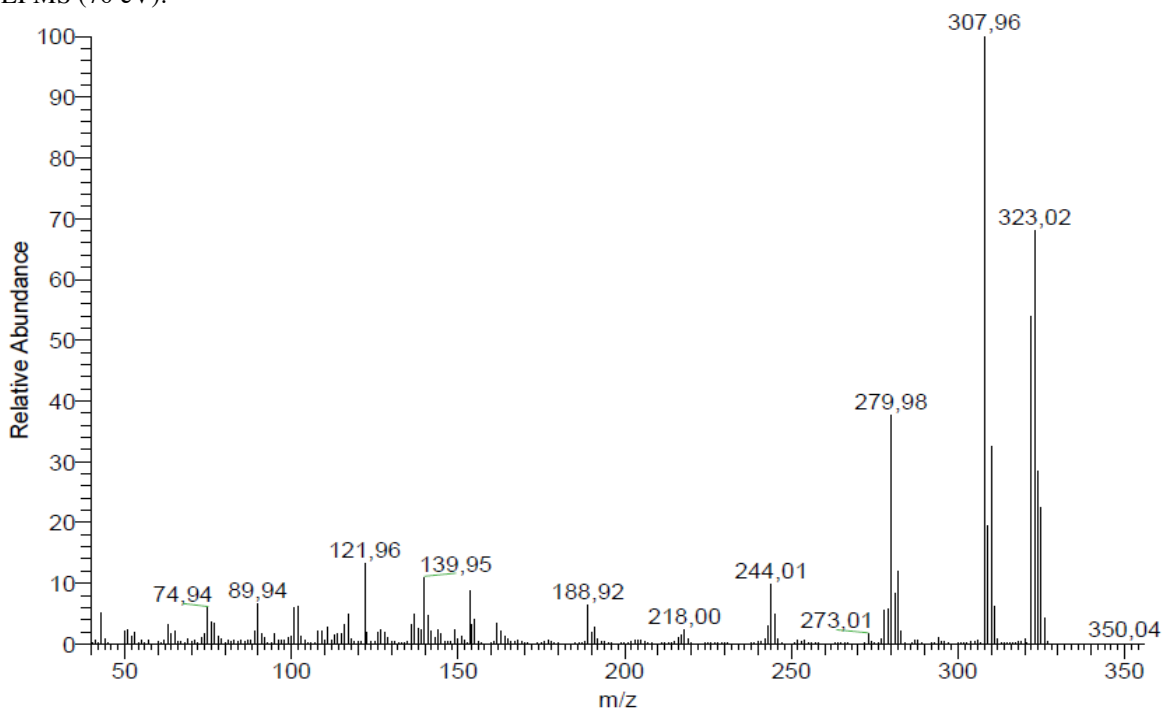

ESI-QTOF (negative ionization)

MS Zoomed Spectrum

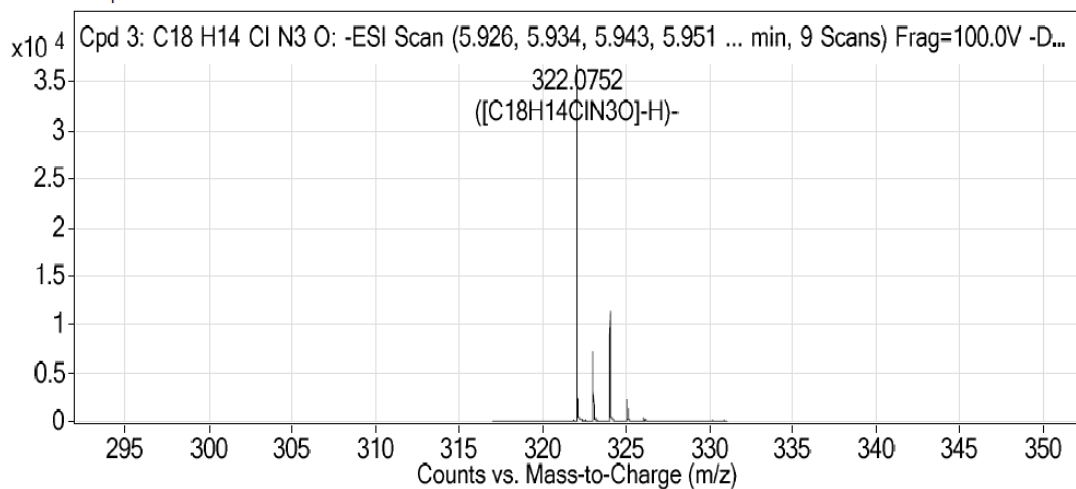

### MS Spectrum Peak List

| m/z      | Calc m/z | Diff(ppm) | z | Abund    | Formula     | Ion    |
|----------|----------|-----------|---|----------|-------------|--------|
| 322.0752 | 322.0753 | 0.27      | 1 | 37574.44 | C18H14ClN3O | (M-H)- |
| 323.0785 | 323.0783 | -0.73     | 1 | 7523.98  | C18H14ClN3O | (M-H)- |
| 324.0729 | 324.0729 | 0.03      | 1 | 11691.43 | C18H14ClN3O | (M-H)- |
| 325.0764 | 325.0756 | -2.67     | 1 | 2384.38  | C18H14ClN3O | (M-H)- |
| 326.0773 | 326.0783 | 3.2       | 1 | 366.82   | C18H14ClN3O | (M-H)- |

## Compound-6b

EI MS (70 eV):

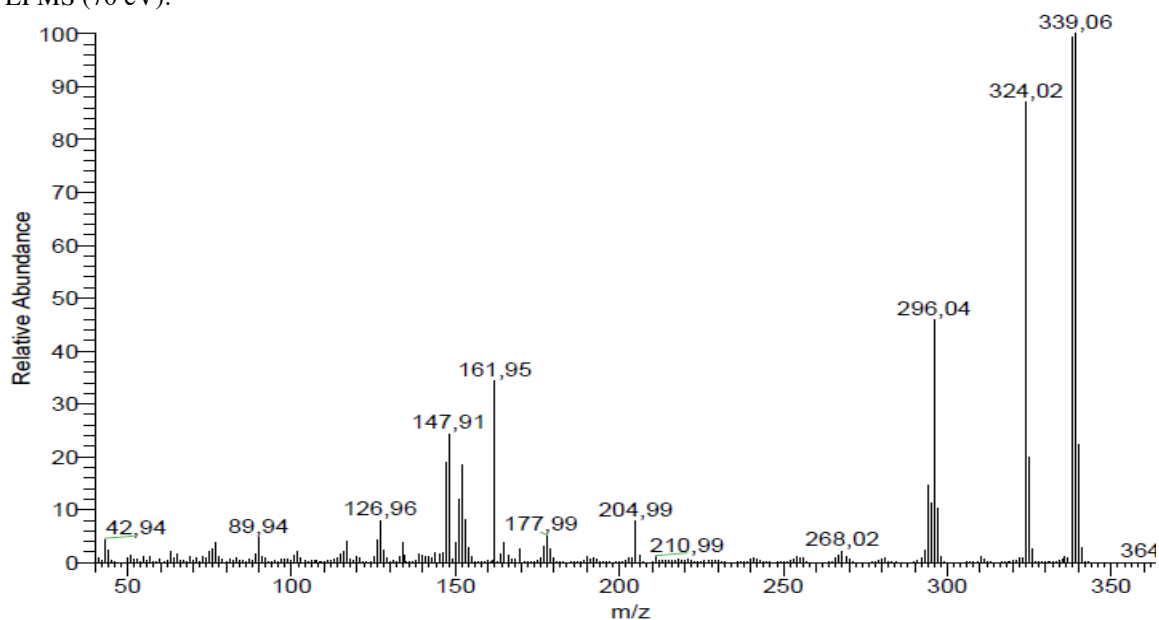

ESI-QTOF (positive ionization)

MS Zoomed Spectrum

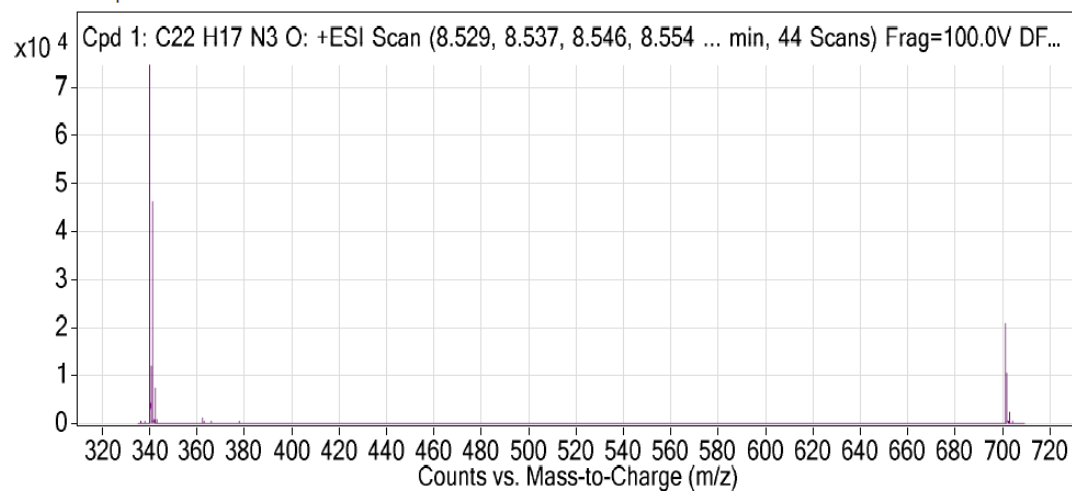

### MS Spectrum Peak List

| m/z      | Calc m/z | Diff(ppm) | z | Abund    | Formula                                          | Ion                  |
|----------|----------|-----------|---|----------|--------------------------------------------------|----------------------|
| 340.1442 | 340.1444 | 0.69      | 1 | 35868.74 | C <sub>22</sub> H <sub>17</sub> N <sub>3</sub> O | (M+H) <sup>+</sup>   |
| 341.1473 | 341.1475 | 0.62      | 1 | 8573.41  | C <sub>22</sub> H <sub>17</sub> N <sub>3</sub> O | (M+H) <sup>+</sup>   |
| 342.1506 | 342.1505 | -0.2      | 1 | 1178.38  | C <sub>22</sub> H <sub>17</sub> N <sub>3</sub> O | (M+H) <sup>+</sup>   |
| 343.1505 | 343.1534 | 8.28      | 1 | 108.88   | C <sub>22</sub> H <sub>17</sub> N <sub>3</sub> O | (M+H) <sup>+</sup>   |
| 362.1256 | 362.1264 | 2.21      | 1 | 634.27   | C <sub>22</sub> H <sub>17</sub> N <sub>3</sub> O | (M+Na) <sup>+</sup>  |
| 363.1308 | 363.1295 | -3.67     | 1 | 147.79   | C <sub>22</sub> H <sub>17</sub> N <sub>3</sub> O | (M+Na) <sup>+</sup>  |
| 378.1011 | 378.1003 | -1.98     | 1 | 217.49   | C <sub>22</sub> H <sub>17</sub> N <sub>3</sub> O | (M+K) <sup>+</sup>   |
| 701.2637 | 701.2635 | -0.29     | 1 | 1954.56  | C <sub>22</sub> H <sub>17</sub> N <sub>3</sub> O | (2M+Na) <sup>+</sup> |
| 702.2665 | 702.2666 | 0.22      | 1 | 970.31   | C <sub>22</sub> H <sub>17</sub> N <sub>3</sub> O | (2M+Na) <sup>+</sup> |
| 703.2674 | 703.2697 | 3.24      | 1 | 227.78   | C <sub>22</sub> H <sub>17</sub> N <sub>3</sub> O | (2M+Na) <sup>+</sup> |

## Compound-7a

EI MS (70 eV):

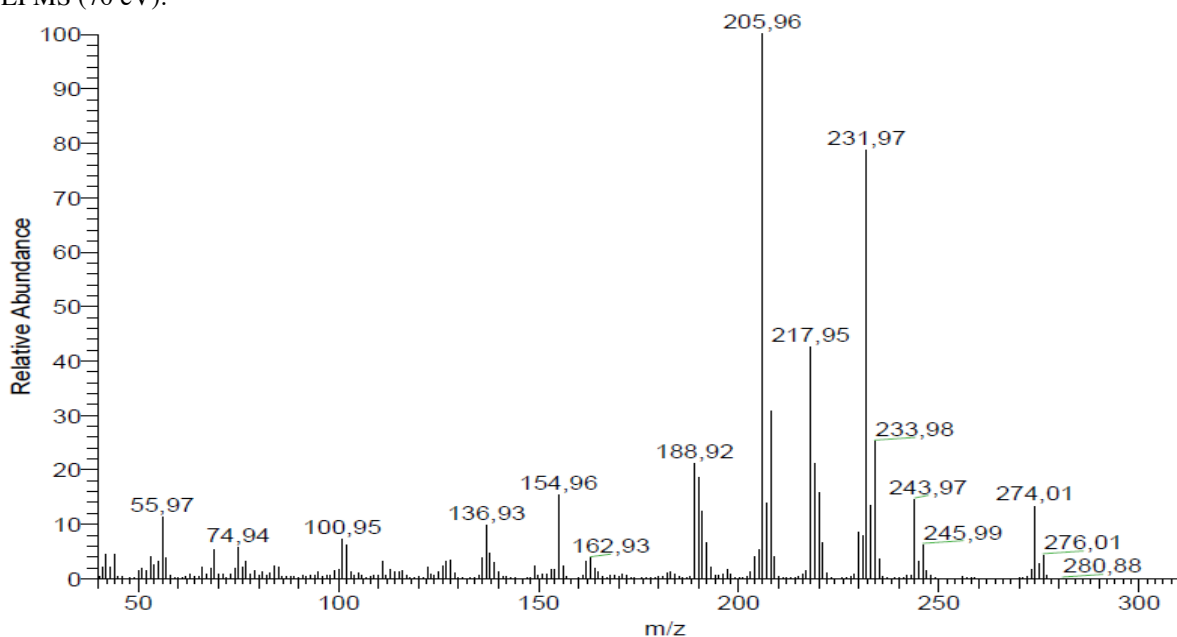

ESI-QTOF (positive ionization)

MS Zoomed Spectrum

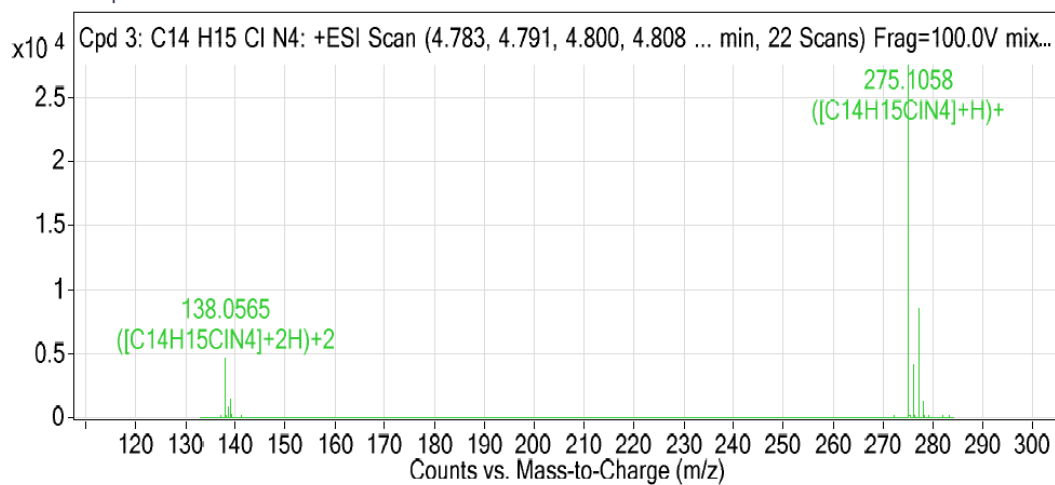

### MS Spectrum Peak List

| m/z      | Calc m/z | Diff(ppm) | z | Abund    | Formula                                          | Ion                   |
|----------|----------|-----------|---|----------|--------------------------------------------------|-----------------------|
| 138.0565 | 138.0565 | 0.45      | 2 | 4721.31  | C <sub>14</sub> H <sub>15</sub> ClN <sub>4</sub> | (M+2H) <sup>+</sup> 2 |
| 138.5585 | 138.558  | -3.78     | 2 | 838.95   | C <sub>14</sub> H <sub>15</sub> ClN <sub>4</sub> | (M+2H) <sup>+</sup> 2 |
| 139.055  | 139.0552 | 1.9       | 2 | 1536.71  | C <sub>14</sub> H <sub>15</sub> ClN <sub>4</sub> | (M+2H) <sup>+</sup> 2 |
| 139.5576 | 139.5565 | -7.65     | 2 | 292.12   | C <sub>14</sub> H <sub>15</sub> ClN <sub>4</sub> | (M+2H) <sup>+</sup> 2 |
| 275.1058 | 275.1058 | -0.15     | 1 | 27792.35 | C <sub>14</sub> H <sub>15</sub> ClN <sub>4</sub> | (M+H) <sup>+</sup>    |
| 276.1088 | 276.1086 | -0.66     | 1 | 4359.65  | C <sub>14</sub> H <sub>15</sub> ClN <sub>4</sub> | (M+H) <sup>+</sup>    |
| 277.1027 | 277.1032 | 1.69      | 1 | 8458.56  | C <sub>14</sub> H <sub>15</sub> ClN <sub>4</sub> | (M+H) <sup>+</sup>    |
| 278.106  | 278.1058 | -0.79     | 1 | 1319.96  | C <sub>14</sub> H <sub>15</sub> ClN <sub>4</sub> | (M+H) <sup>+</sup>    |
| 279.1075 | 279.1085 | 3.73      | 1 | 86.08    | C <sub>14</sub> H <sub>15</sub> ClN <sub>4</sub> | (M+H) <sup>+</sup>    |

## Compound-7b

EI MS (70 eV):

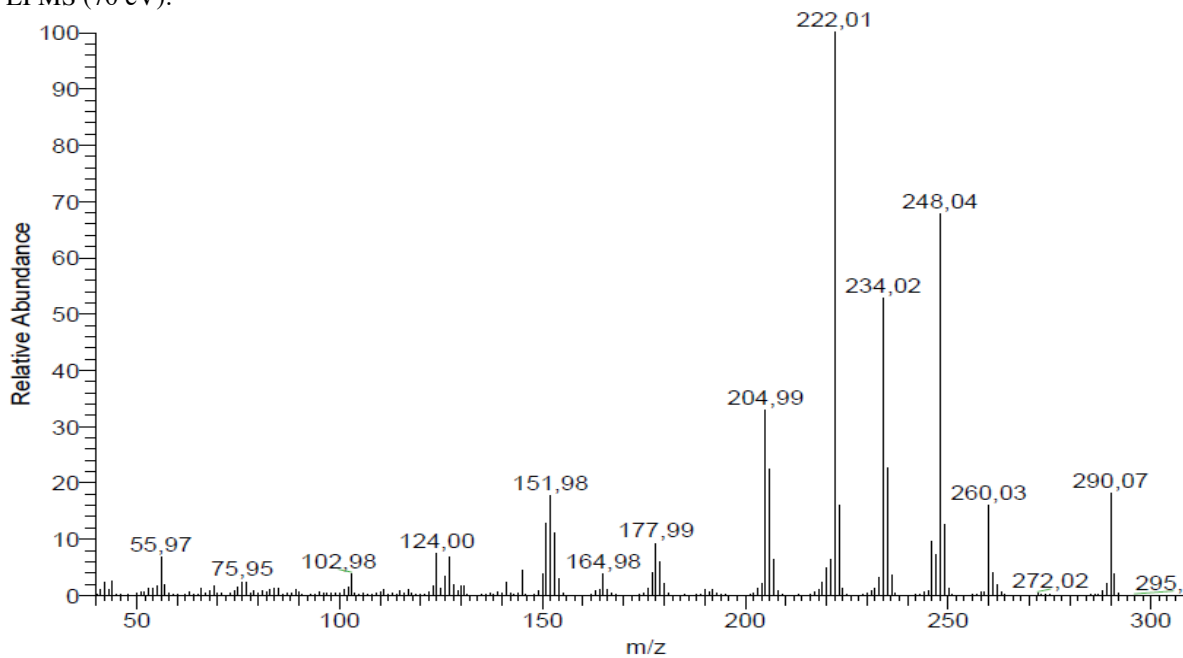

ESI-QTOF (positive ionization)

MS Zoomed Spectrum

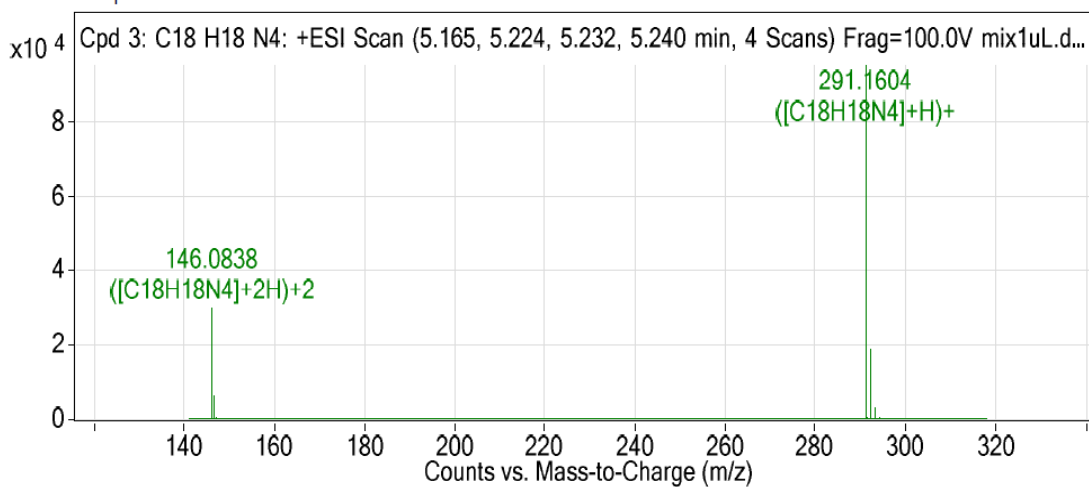

### MS Spectrum Peak List

| m/z      | Calc m/z | Diff(ppm) | z | Abund    | Formula                                        | Ion      |
|----------|----------|-----------|---|----------|------------------------------------------------|----------|
| 146.0838 | 146.0838 | 0.35      | 2 | 30000.28 | C <sub>18</sub> H <sub>18</sub> N <sub>4</sub> | (M+2H)+2 |
| 146.5853 | 146.5853 | -0.05     | 2 | 6574.1   | C <sub>18</sub> H <sub>18</sub> N <sub>4</sub> | (M+2H)+2 |
| 147.0872 | 147.0868 | -2.56     | 2 | 670.02   | C <sub>18</sub> H <sub>18</sub> N <sub>4</sub> | (M+2H)+2 |
| 290.1529 | 290.1526 | -0.94     | 1 | 72.01    | C <sub>18</sub> H <sub>18</sub> N <sub>4</sub> | M+       |
| 291.1604 | 291.1604 | 0.07      | 1 | 95697.88 | C <sub>18</sub> H <sub>18</sub> N <sub>4</sub> | (M+H)+   |
| 292.1636 | 292.1634 | -0.64     | 1 | 18823.12 | C <sub>18</sub> H <sub>18</sub> N <sub>4</sub> | (M+H)+   |
| 293.1743 | 293.1663 | -27.33    | 1 | 2515.68  | C <sub>18</sub> H <sub>18</sub> N <sub>4</sub> | (M+H)+   |
| 294.1788 | 294.1692 | -32.66    | 1 | 533.79   | C <sub>18</sub> H <sub>18</sub> N <sub>4</sub> | (M+H)+   |
| 313.1431 | 313.1424 | -2.41     | 1 | 232.3    | C <sub>18</sub> H <sub>18</sub> N <sub>4</sub> | (M+Na)+  |

## Compound-8a

EI MS (70 eV):

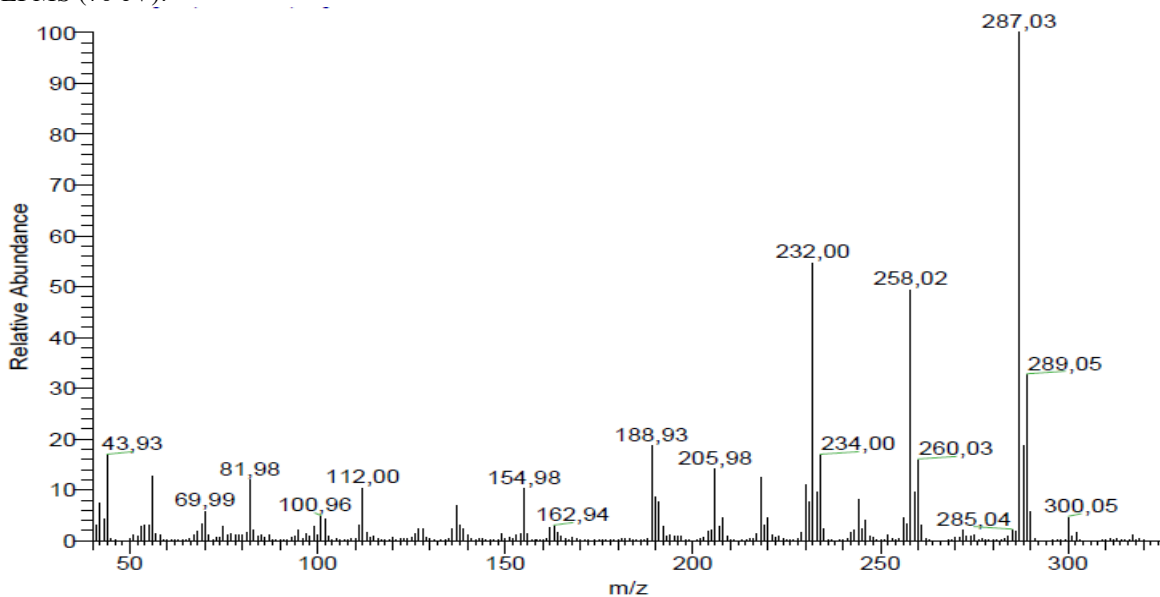

ESI-QTOF (positive ionization)

MS Zoomed Spectrum

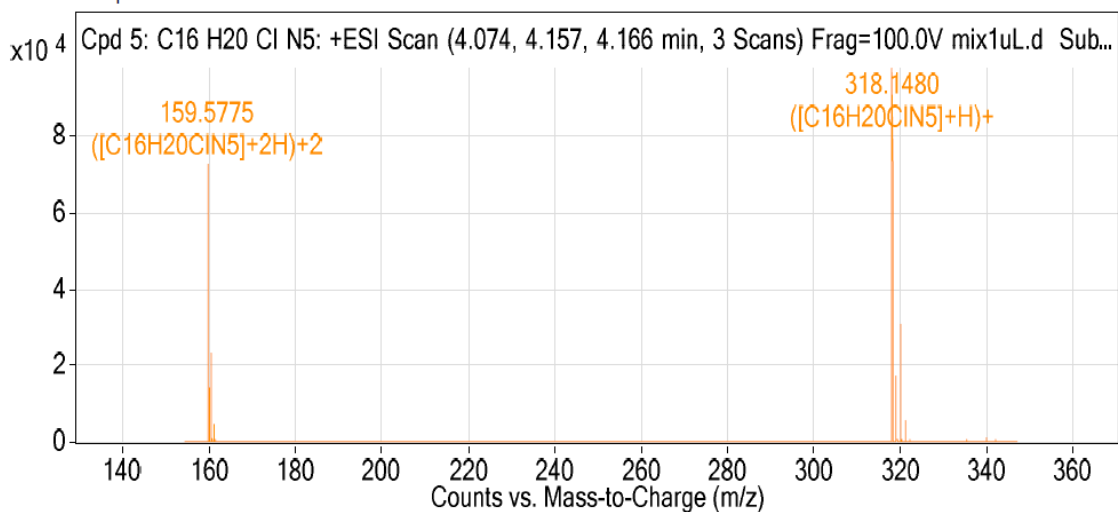

### MS Spectrum Peak List

| m/z      | Calc m/z | Diff(ppm) | z | Abund    | Formula                                          | Ion      |
|----------|----------|-----------|---|----------|--------------------------------------------------|----------|
| 159.5775 | 159.5776 | 1.16      | 2 | 72814.99 | C <sub>16</sub> H <sub>20</sub> CIN <sub>5</sub> | (M+2H)+2 |
| 160.0787 | 160.079  | 1.83      | 2 | 14321.99 | C <sub>16</sub> H <sub>20</sub> CIN <sub>5</sub> | (M+2H)+2 |
| 160.5761 | 160.5764 | 1.83      | 2 | 23190.45 | C <sub>16</sub> H <sub>20</sub> CIN <sub>5</sub> | (M+2H)+2 |
| 161.0772 | 161.0776 | 2.84      | 2 | 4904.01  | C <sub>16</sub> H <sub>20</sub> CIN <sub>5</sub> | (M+2H)+2 |
| 318.148  | 318.148  | 0         | 1 | 98667.85 | C <sub>16</sub> H <sub>20</sub> CIN <sub>5</sub> | (M+H)+   |
| 319.1509 | 319.1508 | -0.18     | 1 | 17068.97 | C <sub>16</sub> H <sub>20</sub> CIN <sub>5</sub> | (M+H)+   |
| 320.1453 | 320.1455 | 0.52      | 1 | 30788.87 | C <sub>16</sub> H <sub>20</sub> CIN <sub>5</sub> | (M+H)+   |
| 321.1485 | 321.148  | -1.5      | 1 | 5659.77  | C <sub>16</sub> H <sub>20</sub> CIN <sub>5</sub> | (M+H)+   |
| 322.149  | 322.1507 | 5.3       | 1 | 574.63   | C <sub>16</sub> H <sub>20</sub> CIN <sub>5</sub> | (M+H)+   |
| 340.1291 | 340.1299 | 2.55      | 1 | 980.45   | C <sub>16</sub> H <sub>20</sub> CIN <sub>5</sub> | (M+Na)+  |

## Compound-8b

EI MS (70 eV):

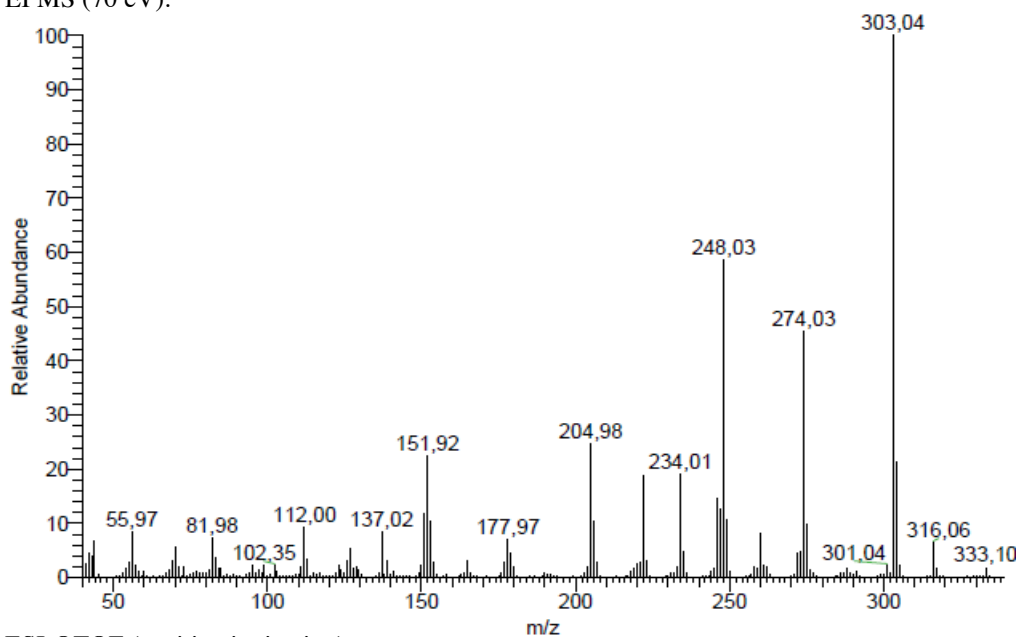

ESI-QTOF (positive ionization)

MS Zoomed Spectrum

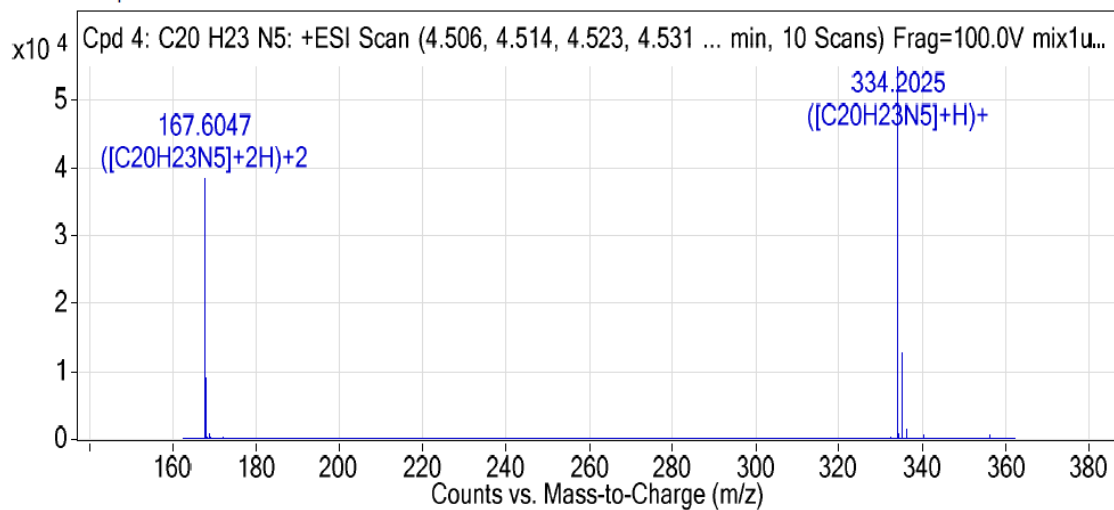

### MS Spectrum Peak List

| m/z      | Calc m/z | Diff(ppm) | z | Abund    | Formula                                        | Ion      |
|----------|----------|-----------|---|----------|------------------------------------------------|----------|
| 167.6047 | 167.6049 | 1.2       | 2 | 38757.25 | C <sub>20</sub> H <sub>23</sub> N <sub>5</sub> | (M+2H)+2 |
| 168.1062 | 168.1064 | 1.35      | 2 | 9285.34  | C <sub>20</sub> H <sub>23</sub> N <sub>5</sub> | (M+2H)+2 |
| 168.6081 | 168.6078 | -1.31     | 2 | 1029.38  | C <sub>20</sub> H <sub>23</sub> N <sub>5</sub> | (M+2H)+2 |
| 334.2025 | 334.2026 | 0.49      | 1 | 55875.35 | C <sub>20</sub> H <sub>23</sub> N <sub>5</sub> | (M+H)+   |
| 335.2056 | 335.2055 | -0.21     | 1 | 12647.92 | C <sub>20</sub> H <sub>23</sub> N <sub>5</sub> | (M+H)+   |
| 336.2091 | 336.2084 | -2.07     | 1 | 1419.51  | C <sub>20</sub> H <sub>23</sub> N <sub>5</sub> | (M+H)+   |
| 337.2116 | 337.2113 | -0.93     | 1 | 117.88   | C <sub>20</sub> H <sub>23</sub> N <sub>5</sub> | (M+H)+   |
| 356.1838 | 356.1846 | 2.12      | 1 | 559.45   | C <sub>20</sub> H <sub>23</sub> N <sub>5</sub> | (M+Na)+  |
| 357.1876 | 357.1875 | -0.45     | 1 | 135.32   | C <sub>20</sub> H <sub>23</sub> N <sub>5</sub> | (M+Na)+  |

## Compound-9

EI MS (70 eV):

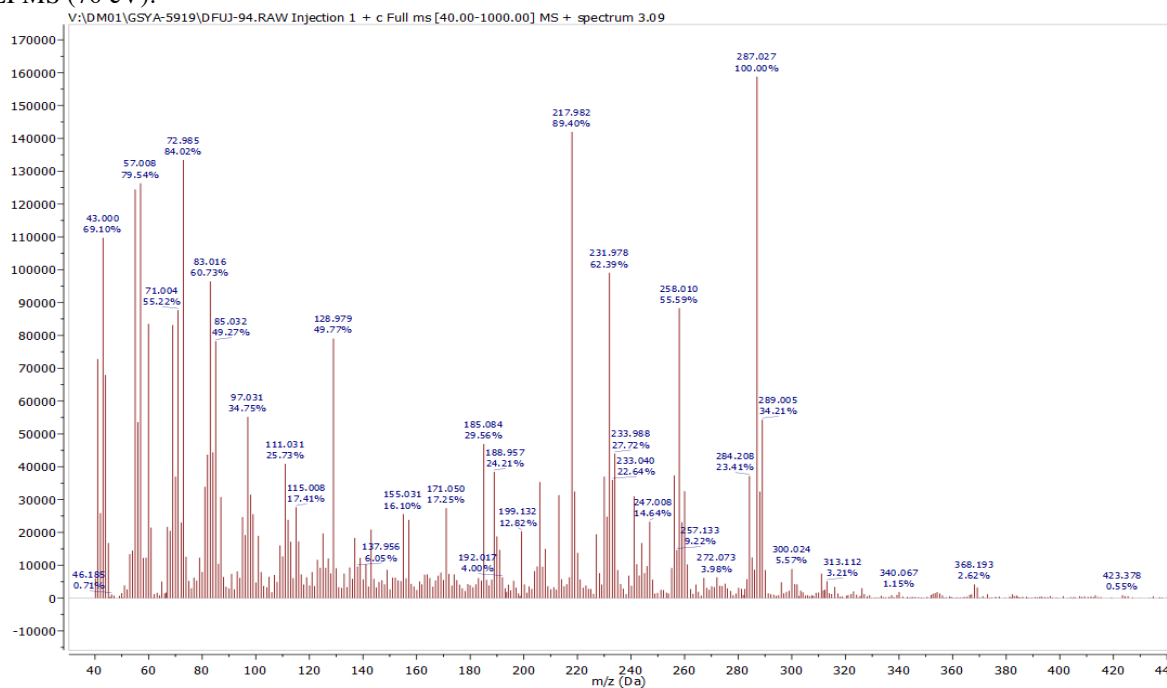

ESI-QTOF (positive ionization)

MS Zoomed Spectrum

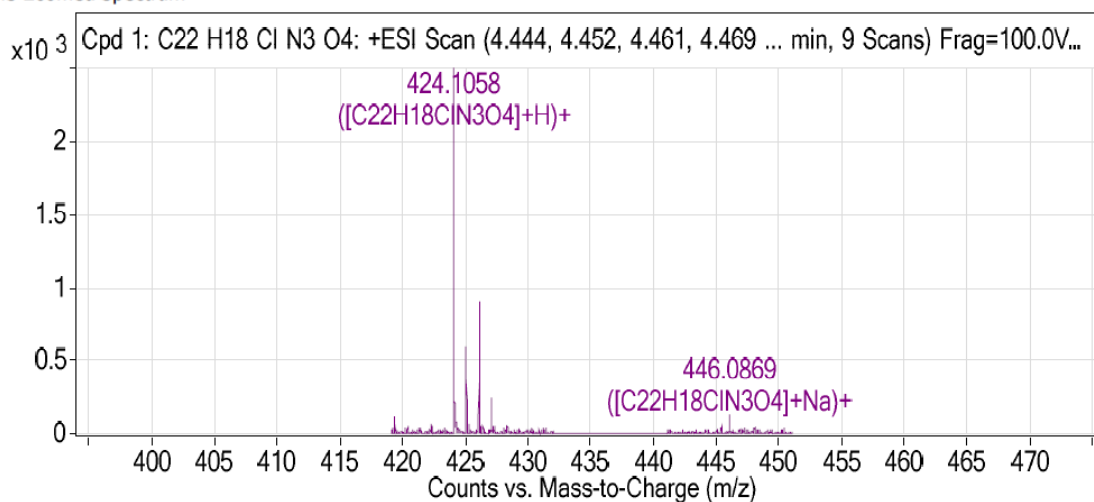

MS Spectrum Peak List

| m/z      | Calc m/z | Diff(ppm) | z | Abund   | Formula                                                         | Ion                 |
|----------|----------|-----------|---|---------|-----------------------------------------------------------------|---------------------|
| 424.1058 | 424.1059 | 0.13      | 1 | 2546.19 | C <sub>22</sub> H <sub>18</sub> ClN <sub>3</sub> O <sub>4</sub> | (M+H) <sup>+</sup>  |
| 425.1093 | 425.109  | -0.79     | 1 | 624.55  | C <sub>22</sub> H <sub>18</sub> ClN <sub>3</sub> O <sub>4</sub> | (M+H) <sup>+</sup>  |
| 426.1035 | 426.1039 | 0.89      | 1 | 960.85  | C <sub>22</sub> H <sub>18</sub> ClN <sub>3</sub> O <sub>4</sub> | (M+H) <sup>+</sup>  |
| 427.1062 | 427.1064 | 0.62      | 1 | 254.52  | C <sub>22</sub> H <sub>18</sub> ClN <sub>3</sub> O <sub>4</sub> | (M+H) <sup>+</sup>  |
| 446.0869 | 446.0878 | 2.01      | 1 | 96.91   | C <sub>22</sub> H <sub>18</sub> ClN <sub>3</sub> O <sub>4</sub> | (M+Na) <sup>+</sup> |

## Compound-10a

EI MS (70 eV):

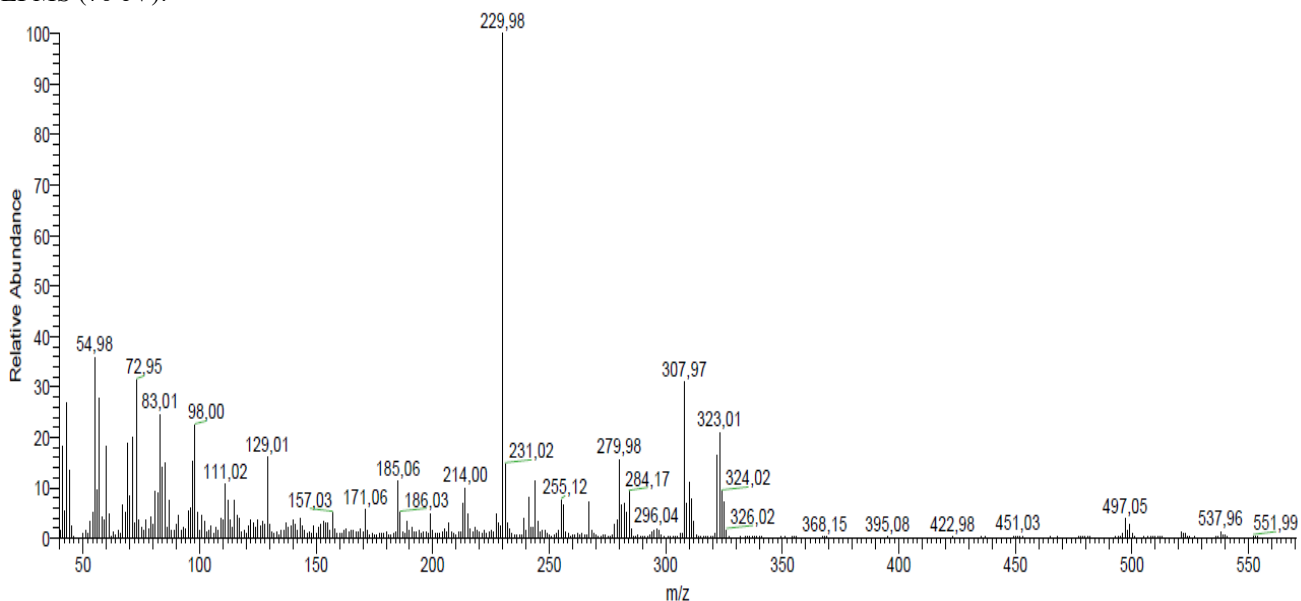

ESI-QTOF (negative ionization)

MS Zoomed Spectrum

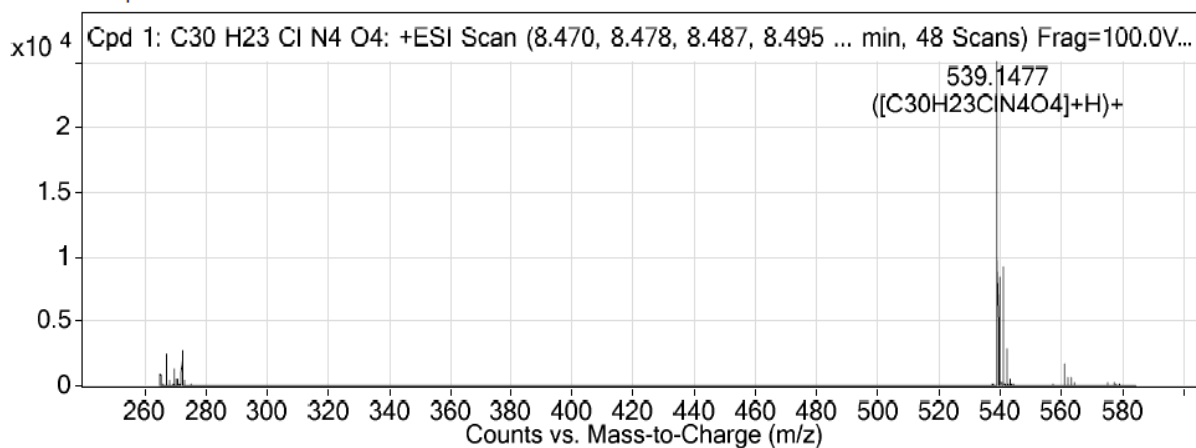

### MS Spectrum Peak List

| <i>m/z</i> | <i>Calc m/z</i> | Diff(ppm) | <i>z</i> | Abund    | Formula                                                         | Ion      |
|------------|-----------------|-----------|----------|----------|-----------------------------------------------------------------|----------|
| 270.0778   | 270.0777        | -0.47     | 2        | 1474.46  | C <sub>30</sub> H <sub>23</sub> CIN <sub>4</sub> O <sub>4</sub> | (M+2H)+2 |
| 271.0774   | 271.077         | -1.57     | 2        | 606.35   | C <sub>30</sub> H <sub>23</sub> CIN <sub>4</sub> O <sub>4</sub> | (M+2H)+2 |
| 539.1477   | 539.1481        | 0.62      | 1        | 25868.74 | C <sub>30</sub> H <sub>23</sub> CIN <sub>4</sub> O <sub>4</sub> | (M+H)+   |
| 540.1507   | 540.1512        | 0.82      | 1        | 8713.94  | C <sub>30</sub> H <sub>23</sub> CIN <sub>4</sub> O <sub>4</sub> | (M+H)+   |
| 541.146    | 541.1466        | 1.1       | 1        | 9300.86  | C <sub>30</sub> H <sub>23</sub> CIN <sub>4</sub> O <sub>4</sub> | (M+H)+   |
| 542.1482   | 542.1489        | 1.2       | 1        | 2934.69  | C <sub>30</sub> H <sub>23</sub> CIN <sub>4</sub> O <sub>4</sub> | (M+H)+   |
| 561.1294   | 561.13          | 1.12      | 1        | 1807.6   | C <sub>30</sub> H <sub>23</sub> CIN <sub>4</sub> O <sub>4</sub> | (M+Na)+  |
| 562.1325   | 562.1331        | 1.14      | 1        | 699.04   | C <sub>30</sub> H <sub>23</sub> CIN <sub>4</sub> O <sub>4</sub> | (M+Na)+  |
| 563.1281   | 563.1286        | 0.9       | 1        | 703.34   | C <sub>30</sub> H <sub>23</sub> CIN <sub>4</sub> O <sub>4</sub> | (M+Na)+  |
| 577.1029   | 577.1039        | 1.84      | 1        | 318.6    | C <sub>30</sub> H <sub>23</sub> CIN <sub>4</sub> O <sub>4</sub> | (M+K)+   |



## Compound-10b

EI MS (70 eV):

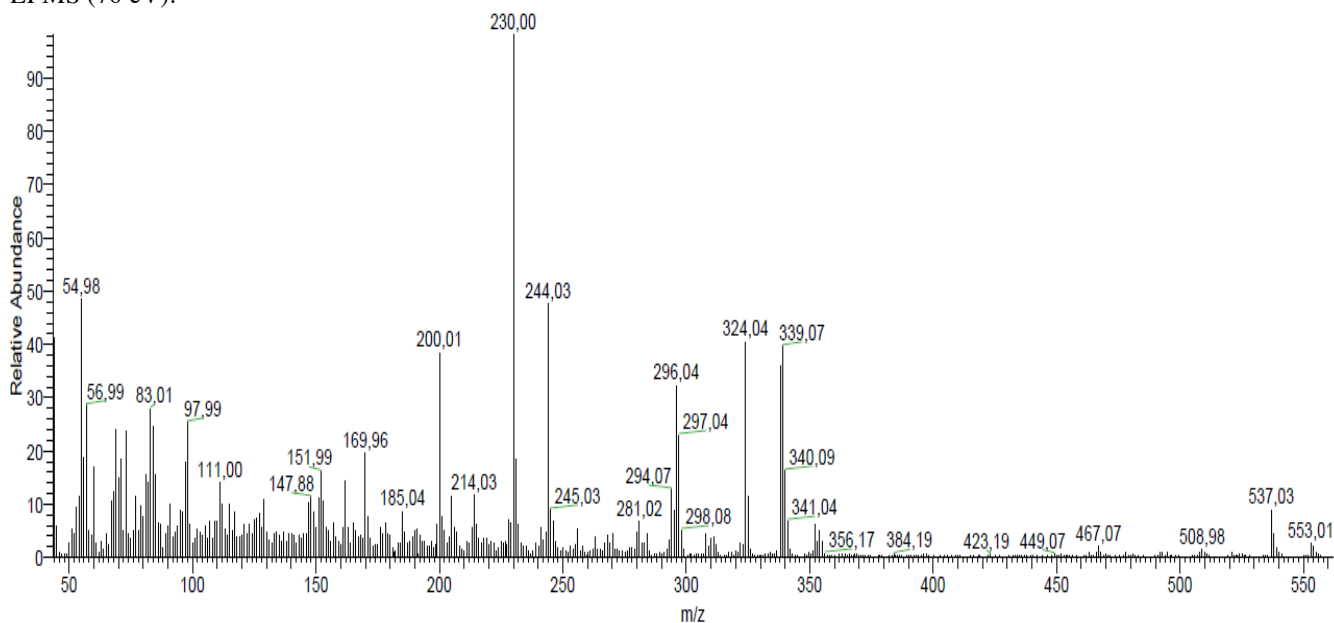

ESI-QTOF (positive ionization)

MS Zoomed Spectrum

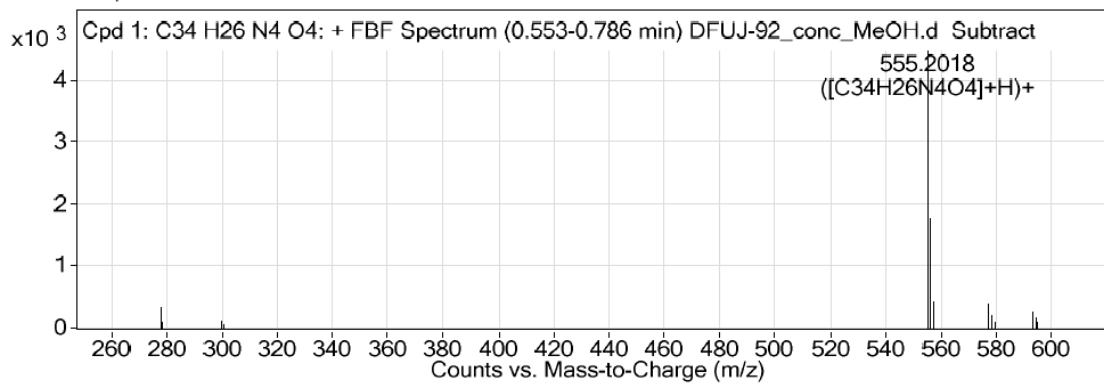

### MS Spectrum Peak List

| m/z      | z | Abund   | Formula                                                       | Ion       |
|----------|---|---------|---------------------------------------------------------------|-----------|
| 278.1064 | 2 | 320.45  | C <sub>34</sub> H <sub>26</sub> N <sub>4</sub> O <sub>4</sub> | (M+2H)+2  |
| 300.0841 | 2 | 112.63  | C <sub>34</sub> H <sub>26</sub> N <sub>4</sub> O <sub>4</sub> | (M+2Na)+2 |
| 555.2018 | 1 | 4457.28 | C <sub>34</sub> H <sub>26</sub> N <sub>4</sub> O <sub>4</sub> | (M+H)+    |
| 556.2046 | 1 | 1769.82 | C <sub>34</sub> H <sub>26</sub> N <sub>4</sub> O <sub>4</sub> | (M+H)+    |
| 557.2094 | 1 | 421.59  | C <sub>34</sub> H <sub>26</sub> N <sub>4</sub> O <sub>4</sub> | (M+H)+    |
| 577.1854 | 1 | 382.99  | C <sub>34</sub> H <sub>26</sub> N <sub>4</sub> O <sub>4</sub> | (M+Na)+   |
| 578.1877 | 1 | 198.02  | C <sub>34</sub> H <sub>26</sub> N <sub>4</sub> O <sub>4</sub> | (M+Na)+   |
| 593.1562 | 1 | 257.12  | C <sub>34</sub> H <sub>26</sub> N <sub>4</sub> O <sub>4</sub> | (M+K)+    |
| 594.1615 | 1 | 153.21  | C <sub>34</sub> H <sub>26</sub> N <sub>4</sub> O <sub>4</sub> | (M+K)+    |
| 595.1695 | 1 | 100.41  | C <sub>34</sub> H <sub>26</sub> N <sub>4</sub> O <sub>4</sub> | (M+K)+    |

## Compound-11a

EI MS (70 eV):

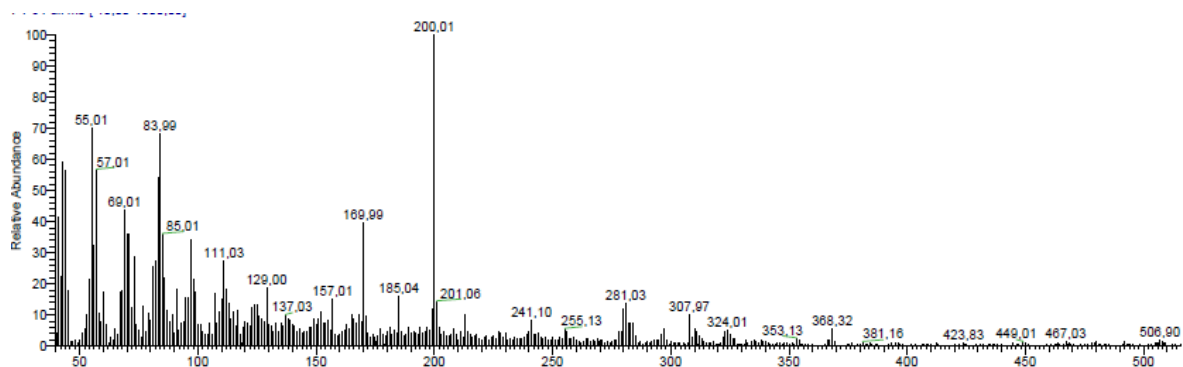

ESI-QTOF (positive ionization)

MS Zoomed Spectrum

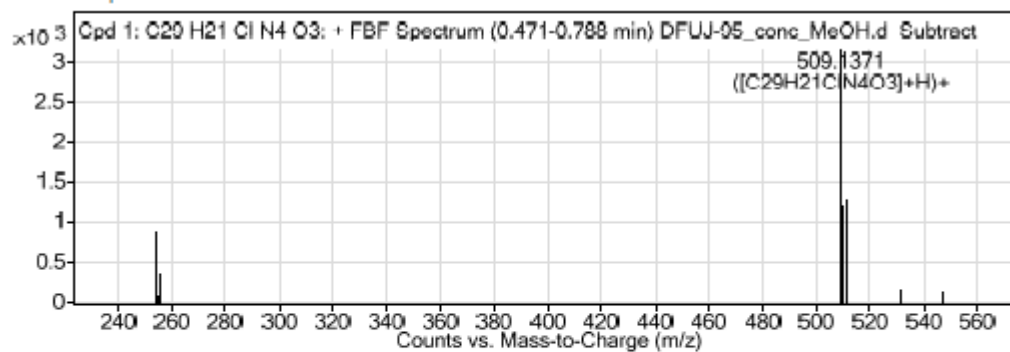

MS Spectrum Peak List

| <i>m/z</i> | <i>z</i> | Abund   | Formula                                                         | Ion                |
|------------|----------|---------|-----------------------------------------------------------------|--------------------|
| 254.0698   | 2        | 854.26  | C <sub>29</sub> H <sub>21</sub> ClN <sub>4</sub> O <sub>3</sub> | M+2                |
| 254.5794   | 2        | 58.61   | C <sub>29</sub> H <sub>21</sub> ClN <sub>4</sub> O <sub>3</sub> | M+2                |
| 255.0737   | 2        | 351.97  | C <sub>29</sub> H <sub>21</sub> ClN <sub>4</sub> O <sub>3</sub> | M+2                |
| 509.1371   | 1        | 3142.96 | C <sub>29</sub> H <sub>21</sub> ClN <sub>4</sub> O <sub>3</sub> | (M+H) <sup>+</sup> |
| 510.1383   | 1        | 1204.68 | C <sub>29</sub> H <sub>21</sub> ClN <sub>4</sub> O <sub>3</sub> | (M+H) <sup>+</sup> |
| 511.136    | 1        | 1259.48 | C <sub>29</sub> H <sub>21</sub> ClN <sub>4</sub> O <sub>3</sub> | (M+H) <sup>+</sup> |

## Compound-11b

EI MS (70 eV):

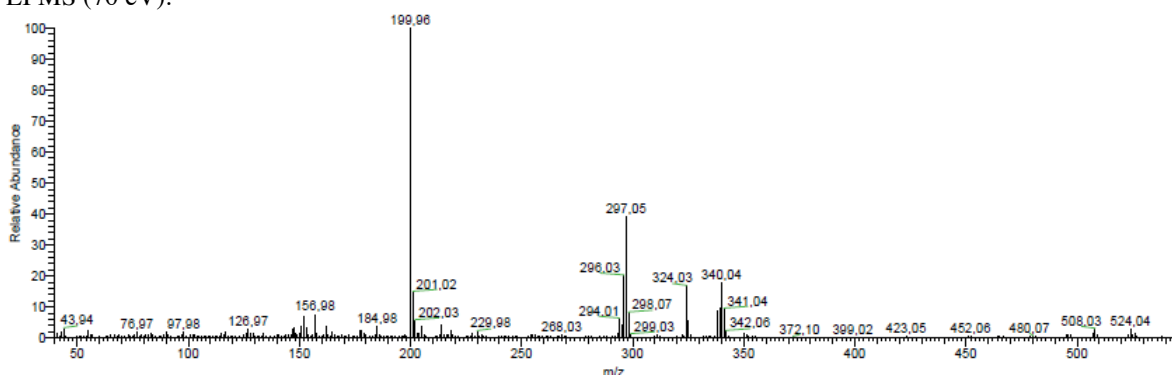

ESI-QTOF (positive ionization)

MS Zoomed Spectrum

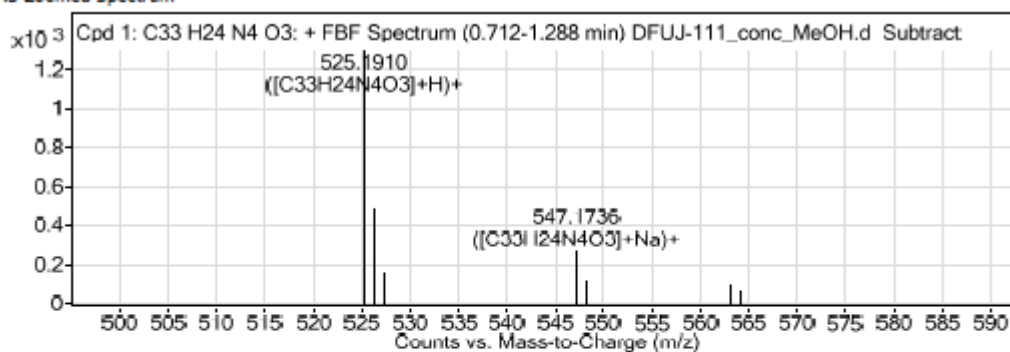

MS Spectrum Peak List

| <i>m/z</i> | <i>z</i> | Abund  | Formula                                                       | Ion                 |
|------------|----------|--------|---------------------------------------------------------------|---------------------|
| 525.191    | 1        | 1290.9 | C <sub>33</sub> H <sub>24</sub> N <sub>4</sub> O <sub>3</sub> | (M+H) <sup>+</sup>  |
| 526.1951   | 1        | 488.89 | C <sub>33</sub> H <sub>24</sub> N <sub>4</sub> O <sub>3</sub> | (M+H) <sup>+</sup>  |
| 527.1965   | 1        | 152.15 | C <sub>33</sub> H <sub>24</sub> N <sub>4</sub> O <sub>3</sub> | (M+H) <sup>+</sup>  |
| 547.1736   | 1        | 265.02 | C <sub>33</sub> H <sub>24</sub> N <sub>4</sub> O <sub>3</sub> | (M+Na) <sup>+</sup> |
| 548.1764   | 1        | 122.07 | C <sub>33</sub> H <sub>24</sub> N <sub>4</sub> O <sub>3</sub> | (M+Na) <sup>+</sup> |
| 563.1528   | 1        | 101.06 | C <sub>33</sub> H <sub>24</sub> N <sub>4</sub> O <sub>3</sub> | (M+K) <sup>+</sup>  |
| 564.152    | 1        | 69.64  | C <sub>33</sub> H <sub>24</sub> N <sub>4</sub> O <sub>3</sub> | (M+K) <sup>+</sup>  |

## Compound-12a

EI MS (70 eV):

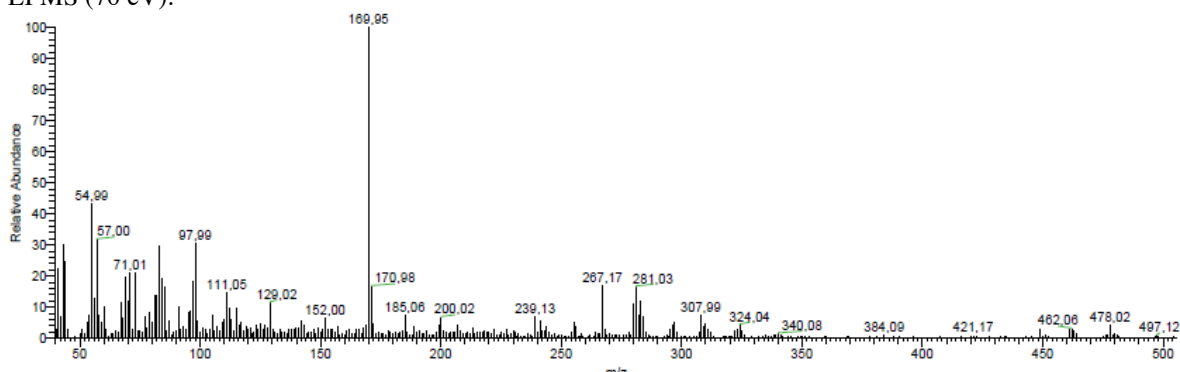

ESI-QTOF (positive ionization)

MS Zoomed Spectrum

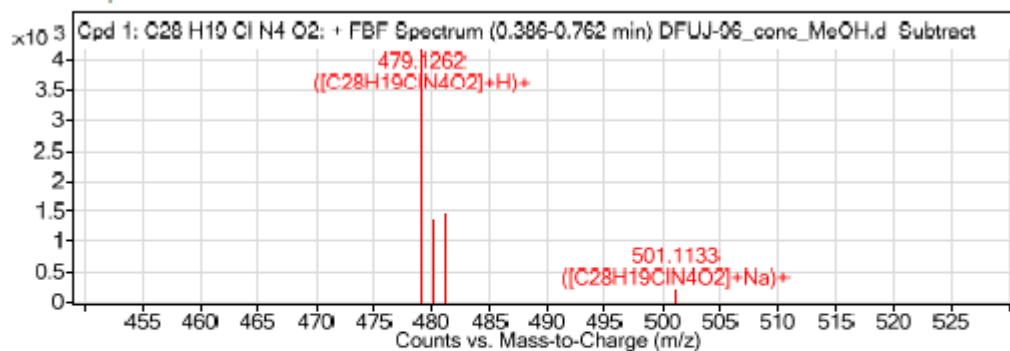

MS Spectrum Peak List

| <i>m/z</i> | <i>z</i> | Abund   | Formula                                                         | Ion                 |
|------------|----------|---------|-----------------------------------------------------------------|---------------------|
| 479.1262   | 1        | 4169.07 | C <sub>28</sub> H <sub>19</sub> ClN <sub>4</sub> O <sub>2</sub> | (M+H) <sup>+</sup>  |
| 480.1296   | 1        | 1345.63 | C <sub>28</sub> H <sub>19</sub> ClN <sub>4</sub> O <sub>2</sub> | (M+H) <sup>+</sup>  |
| 481.1247   | 1        | 1461.19 | C <sub>28</sub> H <sub>19</sub> ClN <sub>4</sub> O <sub>2</sub> | (M+H) <sup>+</sup>  |
| 501.1133   | 1        | 204.37  | C <sub>28</sub> H <sub>19</sub> ClN <sub>4</sub> O <sub>2</sub> | (M+Na) <sup>+</sup> |

MS Spectrum

Compound-12b

EI MS (70 eV):

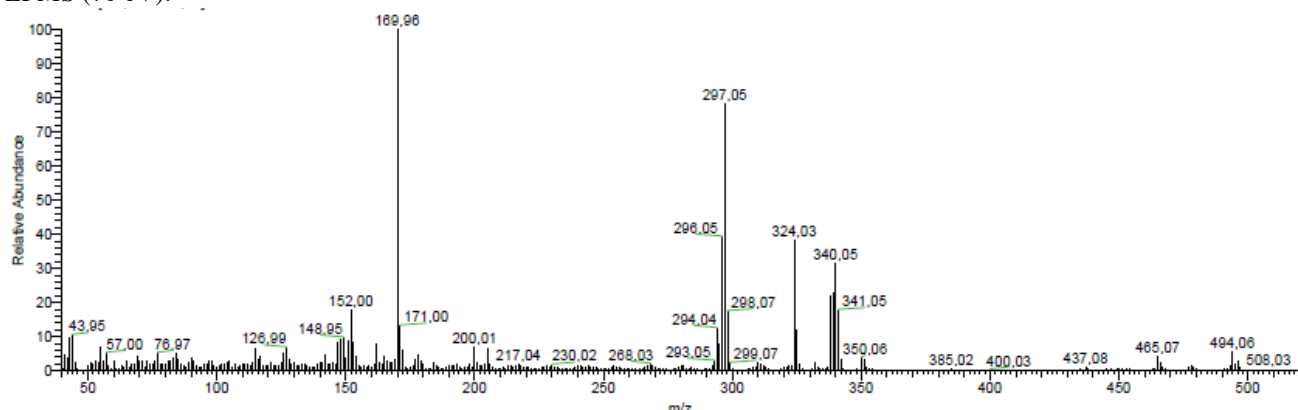

ESI-QTOF (positive ionization)

MS Zoomed Spectrum

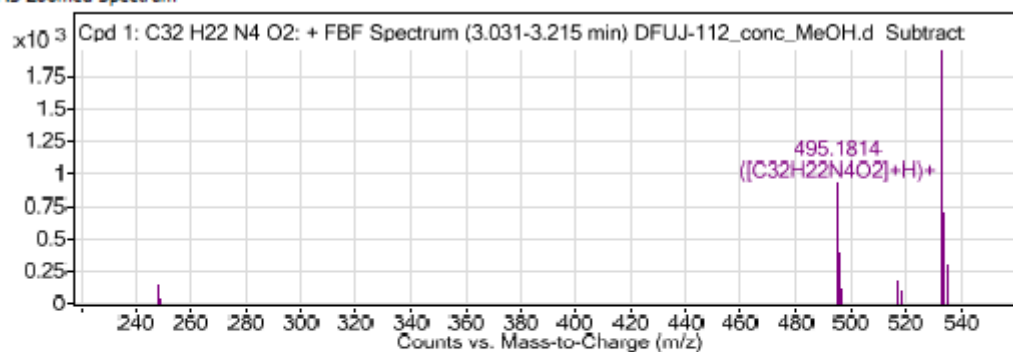

MS Spectrum Peak List

| <i>m/z</i> | <i>z</i> | Abund  | Formula                                                       | Ion                  |
|------------|----------|--------|---------------------------------------------------------------|----------------------|
| 248.0902   | 2        | 150.18 | C <sub>32</sub> H <sub>22</sub> N <sub>4</sub> O <sub>2</sub> | (M+2H) <sup>2+</sup> |
| 248.5825   | 2        | 29.22  | C <sub>32</sub> H <sub>22</sub> N <sub>4</sub> O <sub>2</sub> | (M+2H) <sup>2+</sup> |
| 495.1814   | 1        | 931.92 | C <sub>32</sub> H <sub>22</sub> N <sub>4</sub> O <sub>2</sub> | (M+H) <sup>+</sup>   |
| 496.1829   | 1        | 390.12 | C <sub>32</sub> H <sub>22</sub> N <sub>4</sub> O <sub>2</sub> | (M+H) <sup>+</sup>   |
| 497.1828   | 1        | 107.43 | C <sub>32</sub> H <sub>22</sub> N <sub>4</sub> O <sub>2</sub> | (M+H) <sup>+</sup>   |
| 517.1619   | 1        | 181.5  | C <sub>32</sub> H <sub>22</sub> N <sub>4</sub> O <sub>2</sub> | (M+Na) <sup>+</sup>  |
| 518.1597   | 1        | 92.36  | C <sub>32</sub> H <sub>22</sub> N <sub>4</sub> O <sub>2</sub> | (M+Na) <sup>+</sup>  |

Compound-13a

EI MS (70 eV):

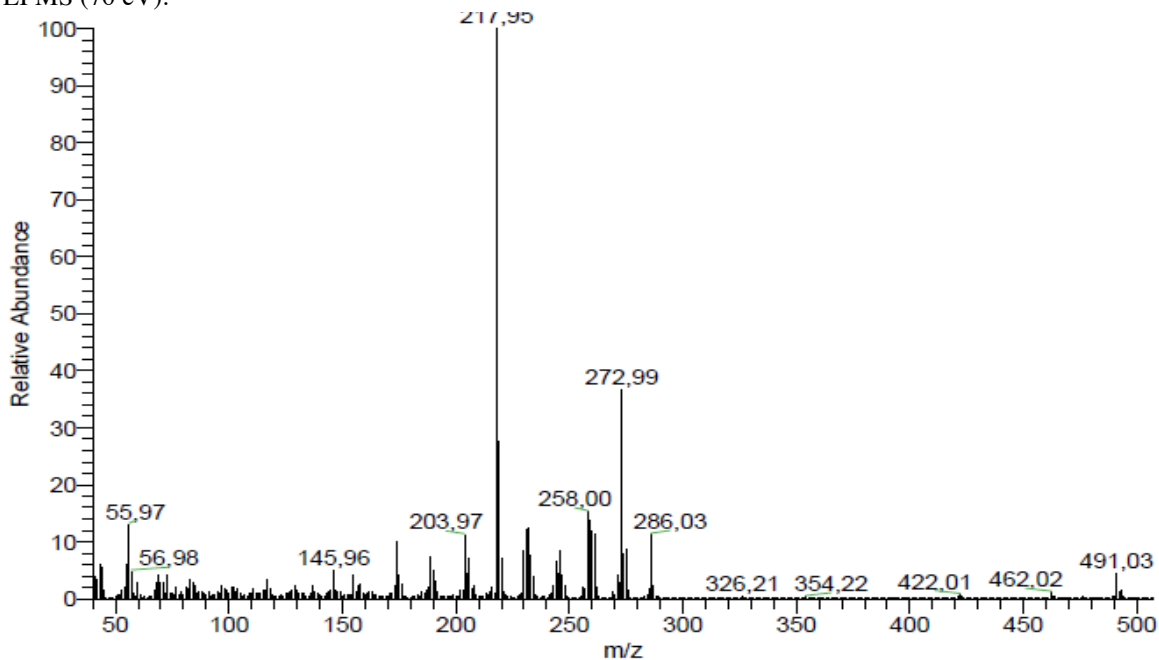

ESI-QTOF (positive ionization)

MS Zoomed Spectrum

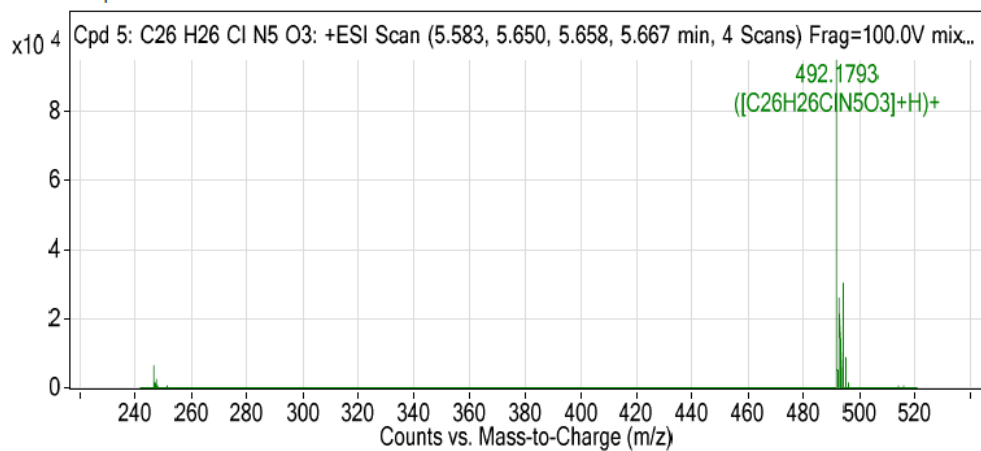

MS Spectrum Peak List

| m/z      | Calc m/z | Diff(ppm) | z | Abund    | Formula                                                         | Ion      |
|----------|----------|-----------|---|----------|-----------------------------------------------------------------|----------|
| 246.5934 | 246.5935 | 0.38      | 2 | 6541.92  | C <sub>26</sub> H <sub>26</sub> ClN <sub>5</sub> O <sub>3</sub> | (M+2H)+2 |
| 247.0958 | 247.095  | -3.43     | 2 | 1689.59  | C <sub>26</sub> H <sub>26</sub> ClN <sub>5</sub> O <sub>3</sub> | (M+2H)+2 |
| 247.5926 | 247.5926 | 0.15      | 2 | 2421.77  | C <sub>26</sub> H <sub>26</sub> ClN <sub>5</sub> O <sub>3</sub> | (M+2H)+2 |
| 248.0934 | 248.0938 | 1.37      | 2 | 643.27   | C <sub>26</sub> H <sub>26</sub> ClN <sub>5</sub> O <sub>3</sub> | (M+2H)+2 |
| 492.1793 | 492.1797 | 0.8       | 1 | 94984.34 | C <sub>26</sub> H <sub>26</sub> ClN <sub>5</sub> O <sub>3</sub> | (M+H)+   |
| 493.1825 | 493.1827 | 0.45      | 1 | 25904.63 | C <sub>26</sub> H <sub>26</sub> ClN <sub>5</sub> O <sub>3</sub> | (M+H)+   |
| 494.1773 | 494.1779 | 1.28      | 1 | 31211.81 | C <sub>26</sub> H <sub>26</sub> ClN <sub>5</sub> O <sub>3</sub> | (M+H)+   |
| 495.18   | 495.1802 | 0.41      | 1 | 8946.72  | C <sub>26</sub> H <sub>26</sub> ClN <sub>5</sub> O <sub>3</sub> | (M+H)+   |
| 496.1825 | 496.1828 | 0.53      | 1 | 1634.62  | C <sub>26</sub> H <sub>26</sub> ClN <sub>5</sub> O <sub>3</sub> | (M+H)+   |
| 514.1608 | 514.1616 | 1.6       | 1 | 751.62   | C <sub>26</sub> H <sub>26</sub> ClN <sub>5</sub> O <sub>3</sub> | (M+Na)+  |

## Compound-13b

EI MS (70 eV):

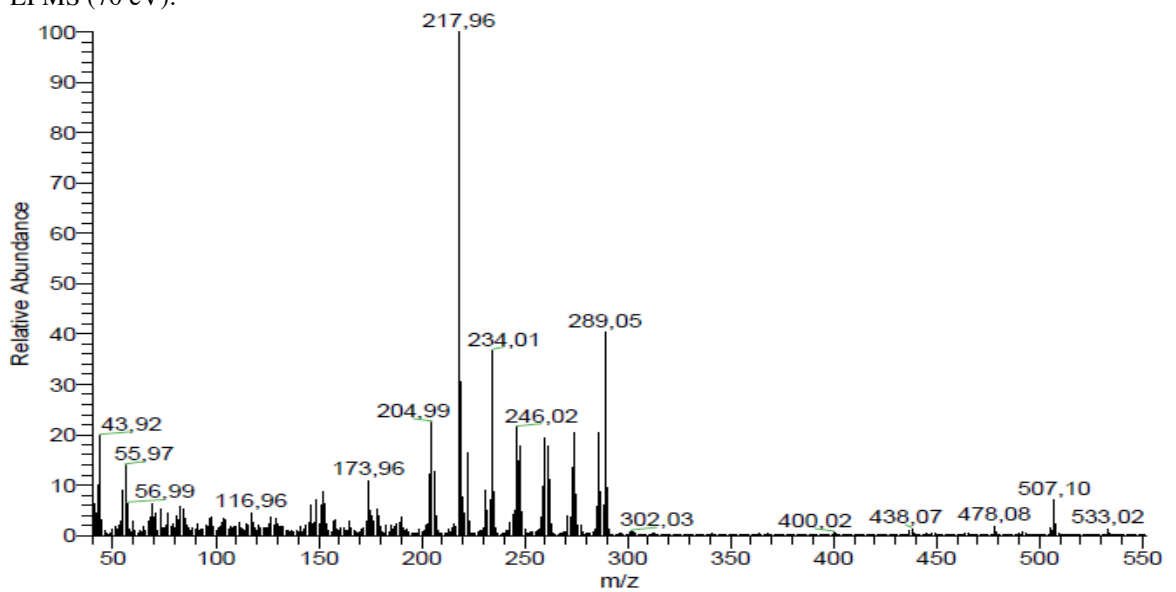

ESI-QTOF (positive ionization)

MS Zoomed Spectrum

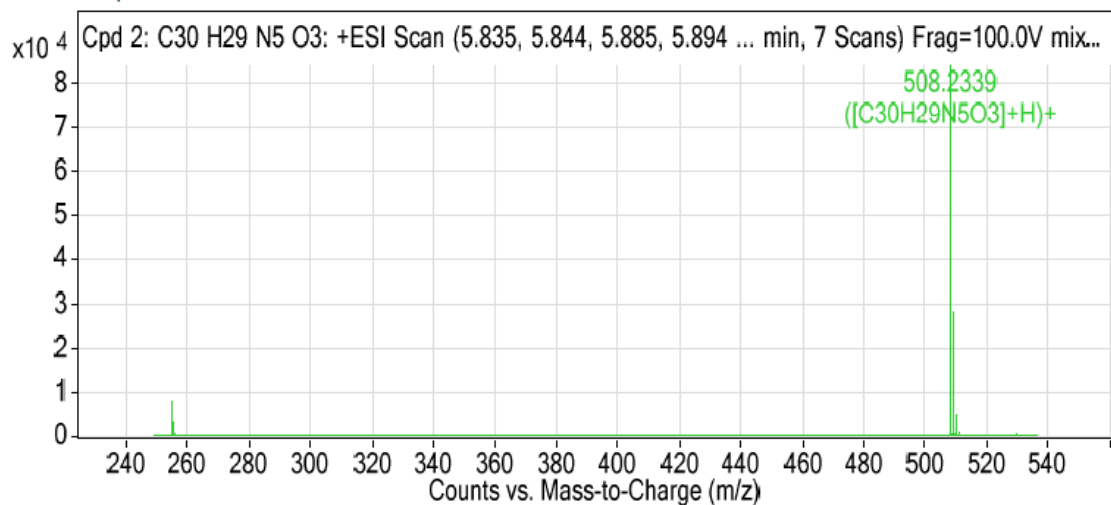

### MS Spectrum Peak List

| m/z      | Calc m/z | Diff(ppm) | z | Abund    | Formula                                                       | Ion                   |
|----------|----------|-----------|---|----------|---------------------------------------------------------------|-----------------------|
| 254.6207 | 254.6208 | 0.37      | 2 | 8068.13  | C <sub>30</sub> H <sub>29</sub> N <sub>5</sub> O <sub>3</sub> | (M+2H) <sup>+</sup> 2 |
| 255.1225 | 255.1223 | -0.66     | 2 | 3158.09  | C <sub>30</sub> H <sub>29</sub> N <sub>5</sub> O <sub>3</sub> | (M+2H) <sup>+</sup> 2 |
| 255.624  | 255.6238 | -1.07     | 2 | 620.52   | C <sub>30</sub> H <sub>29</sub> N <sub>5</sub> O <sub>3</sub> | (M+2H) <sup>+</sup> 2 |
| 508.2339 | 508.2343 | 0.91      | 1 | 86245.99 | C <sub>30</sub> H <sub>29</sub> N <sub>5</sub> O <sub>3</sub> | (M+H) <sup>+</sup>    |
| 509.2369 | 509.2374 | 0.88      | 1 | 28085.54 | C <sub>30</sub> H <sub>29</sub> N <sub>5</sub> O <sub>3</sub> | (M+H) <sup>+</sup>    |
| 510.2408 | 510.2402 | -1.19     | 1 | 4868.47  | C <sub>30</sub> H <sub>29</sub> N <sub>5</sub> O <sub>3</sub> | (M+H) <sup>+</sup>    |
| 511.2426 | 511.243  | 0.81      | 1 | 710.06   | C <sub>30</sub> H <sub>29</sub> N <sub>5</sub> O <sub>3</sub> | (M+H) <sup>+</sup>    |
| 530.2161 | 530.2163 | 0.29      | 1 | 675.4    | C <sub>30</sub> H <sub>29</sub> N <sub>5</sub> O <sub>3</sub> | (M+Na) <sup>+</sup>   |
| 531.2175 | 531.2193 | 3.36      | 1 | 174.87   | C <sub>30</sub> H <sub>29</sub> N <sub>5</sub> O <sub>3</sub> | (M+Na) <sup>+</sup>   |

## Compound-14a

EI MS (70 eV):

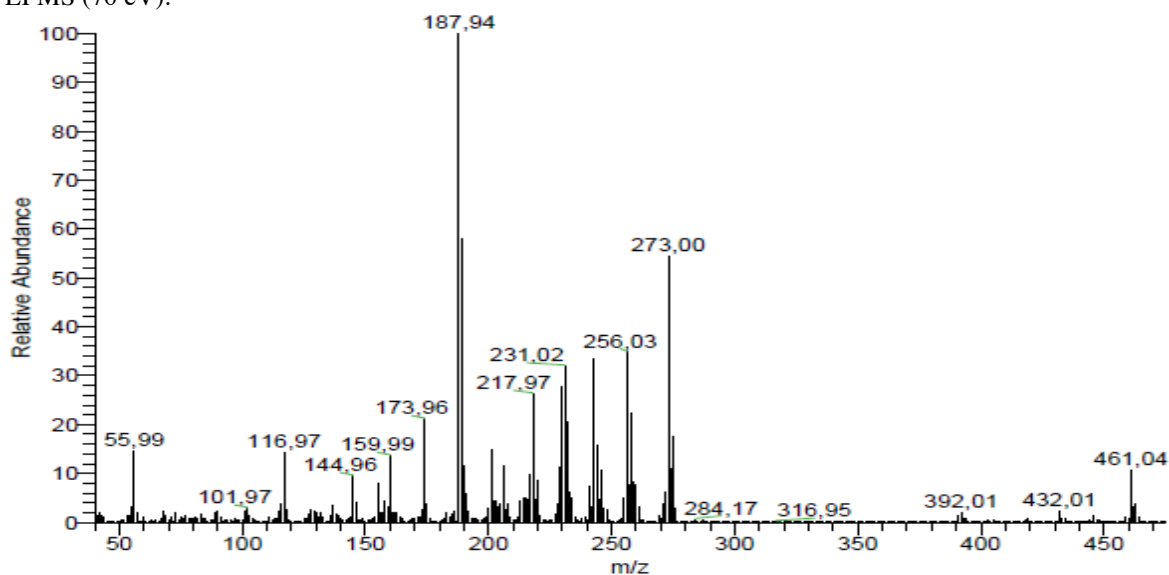

ESI-QTOF (positive ionization)

MS Zoomed Spectrum

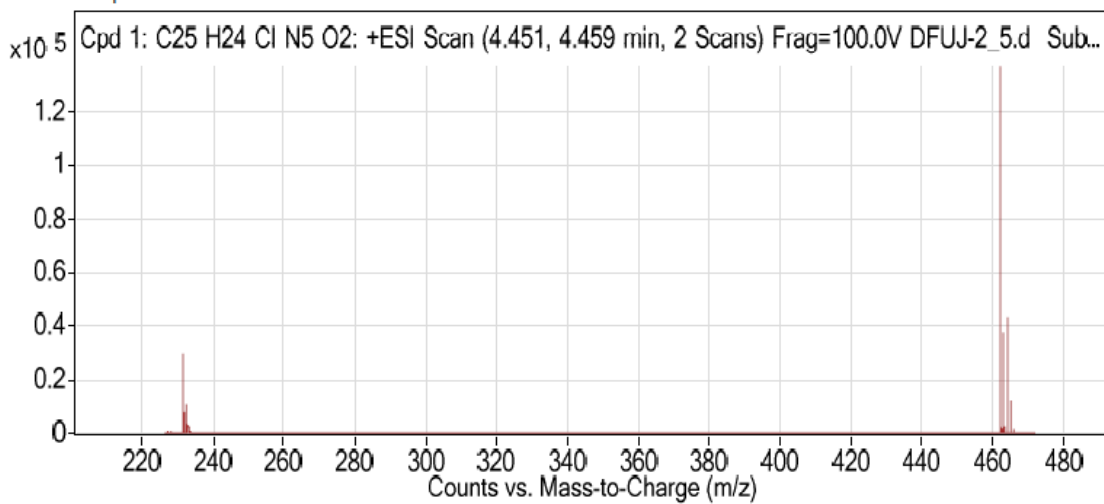

### MS Spectrum Peak List

| m/z      | Calc m/z | Diff(ppm) | z | Abund    | Formula                                                         | Ion                  |
|----------|----------|-----------|---|----------|-----------------------------------------------------------------|----------------------|
| 231.5875 | 231.5882 | 3.19      | 2 | 20447.81 | C <sub>25</sub> H <sub>24</sub> ClN <sub>5</sub> O <sub>2</sub> | (M+2H) <sup>2+</sup> |
| 232.089  | 232.0897 | 3.09      | 2 | 5735.47  | C <sub>25</sub> H <sub>24</sub> ClN <sub>5</sub> O <sub>2</sub> | (M+2H) <sup>2+</sup> |
| 232.5862 | 232.5873 | 4.77      | 2 | 6813.16  | C <sub>25</sub> H <sub>24</sub> ClN <sub>5</sub> O <sub>2</sub> | (M+2H) <sup>2+</sup> |
| 233.0884 | 233.0884 | 0.19      | 2 | 1998.8   | C <sub>25</sub> H <sub>24</sub> ClN <sub>5</sub> O <sub>2</sub> | (M+2H) <sup>2+</sup> |
| 233.5906 | 233.5898 | -3.75     | 2 | 742.84   | C <sub>25</sub> H <sub>24</sub> ClN <sub>5</sub> O <sub>2</sub> | (M+2H) <sup>2+</sup> |
| 462.1687 | 462.1691 | 0.86      | 1 | 96951.16 | C <sub>25</sub> H <sub>24</sub> ClN <sub>5</sub> O <sub>2</sub> | (M+H) <sup>+</sup>   |
| 463.1723 | 463.1721 | -0.49     | 1 | 25742.32 | C <sub>25</sub> H <sub>24</sub> ClN <sub>5</sub> O <sub>2</sub> | (M+H) <sup>+</sup>   |
| 464.1673 | 464.1673 | 0.03      | 1 | 31467.23 | C <sub>25</sub> H <sub>24</sub> ClN <sub>5</sub> O <sub>2</sub> | (M+H) <sup>+</sup>   |
| 465.1689 | 465.1696 | 1.5       | 1 | 8536.45  | C <sub>25</sub> H <sub>24</sub> ClN <sub>5</sub> O <sub>2</sub> | (M+H) <sup>+</sup>   |
| 466.1719 | 466.1722 | 0.72      | 1 | 819      | C <sub>25</sub> H <sub>24</sub> ClN <sub>5</sub> O <sub>2</sub> | (M+H) <sup>+</sup>   |



## Compound-14b

EI MS (70 eV):

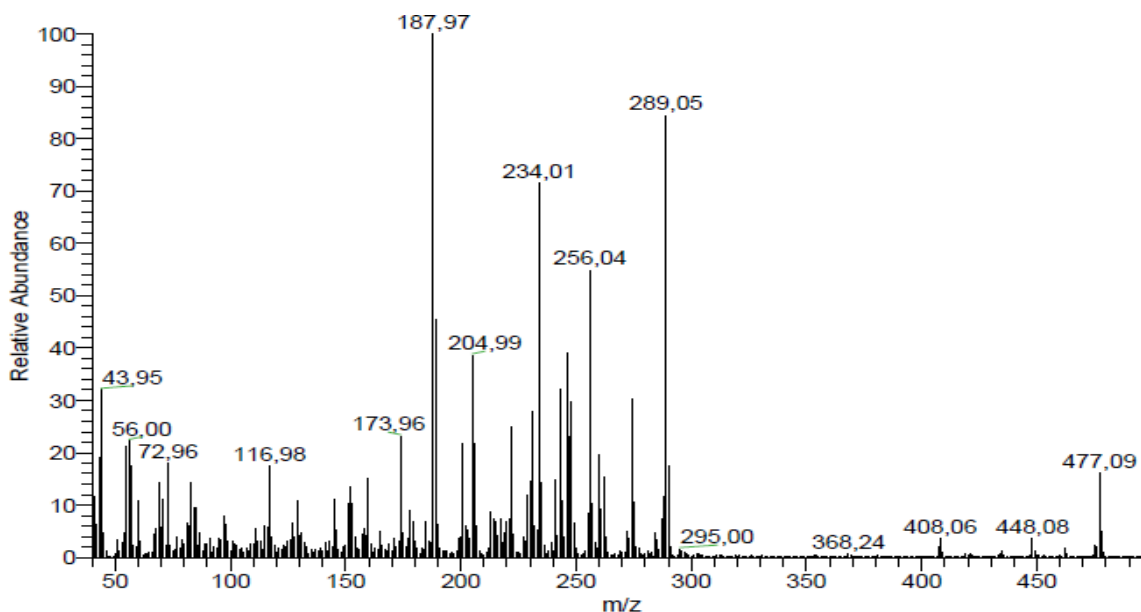

ESI-QTOF (positive ionization)

MS Zoomed Spectrum

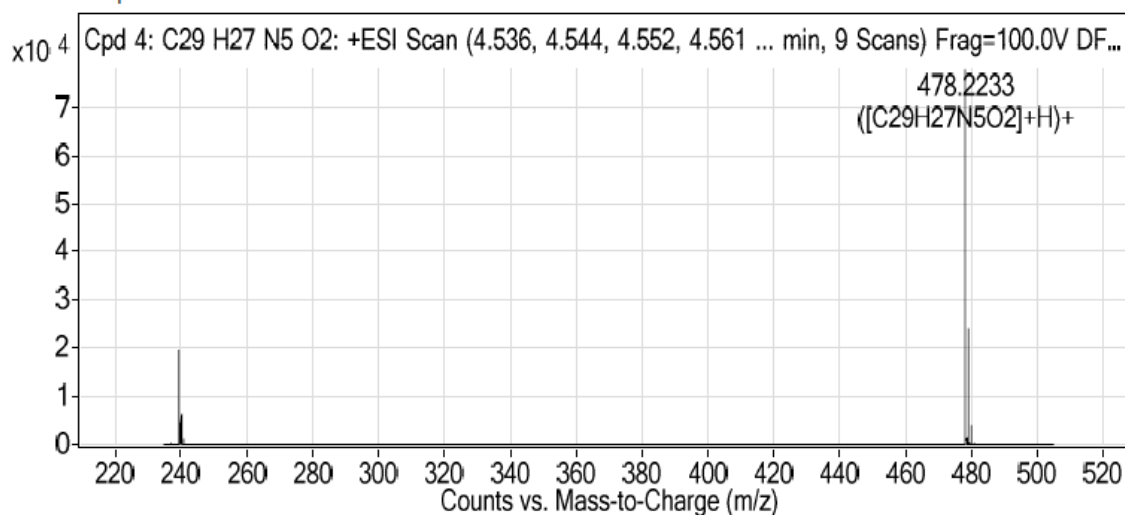

### MS Spectrum Peak List

| m/z      | Calc m/z | Diff(ppm) | z | Abund    | Formula                                                       | Ion                   |
|----------|----------|-----------|---|----------|---------------------------------------------------------------|-----------------------|
| 239.6151 | 239.6155 | 1.63      | 2 | 19635.67 | C <sub>29</sub> H <sub>27</sub> N <sub>5</sub> O <sub>2</sub> | (M+2H) <sup>+</sup> 2 |
| 240.1169 | 240.117  | 0.65      | 2 | 6780.67  | C <sub>29</sub> H <sub>27</sub> N <sub>5</sub> O <sub>2</sub> | (M+2H) <sup>+</sup> 2 |
| 240.6182 | 240.6185 | 1.04      | 2 | 1237.9   | C <sub>29</sub> H <sub>27</sub> N <sub>5</sub> O <sub>2</sub> | (M+2H) <sup>+</sup> 2 |
| 241.1197 | 241.1199 | 0.76      | 2 | 119.69   | C <sub>29</sub> H <sub>27</sub> N <sub>5</sub> O <sub>2</sub> | (M+2H) <sup>+</sup> 2 |
| 478.2233 | 478.2238 | 0.89      | 1 | 78136.55 | C <sub>29</sub> H <sub>27</sub> N <sub>5</sub> O <sub>2</sub> | (M+H) <sup>+</sup>    |
| 479.2264 | 479.2268 | 0.85      | 1 | 24376.47 | C <sub>29</sub> H <sub>27</sub> N <sub>5</sub> O <sub>2</sub> | (M+H) <sup>+</sup>    |
| 480.229  | 480.2297 | 1.48      | 1 | 4254.08  | C <sub>29</sub> H <sub>27</sub> N <sub>5</sub> O <sub>2</sub> | (M+H) <sup>+</sup>    |
| 481.2317 | 481.2325 | 1.58      | 1 | 537.89   | C <sub>29</sub> H <sub>27</sub> N <sub>5</sub> O <sub>2</sub> | (M+H) <sup>+</sup>    |
| 500.2069 | 500.2057 | -2.42     | 1 | 225.96   | C <sub>29</sub> H <sub>27</sub> N <sub>5</sub> O <sub>2</sub> | (M+Na) <sup>+</sup>   |

## Compound-15a

EI MS (70 eV):

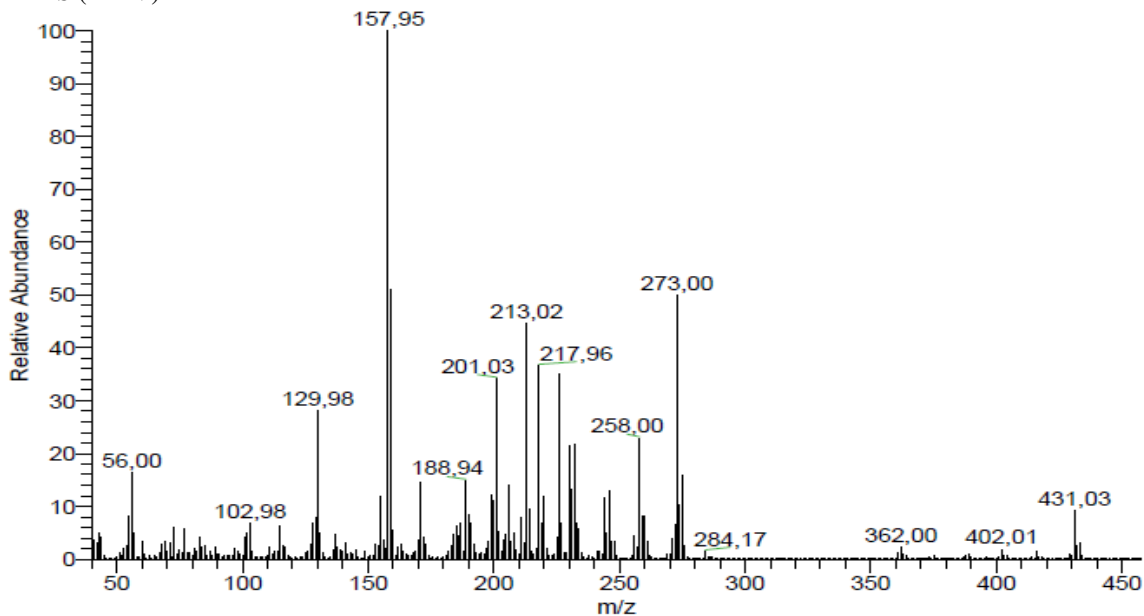

ESI-QTOF (positive ionization)

MS Zoomed Spectrum

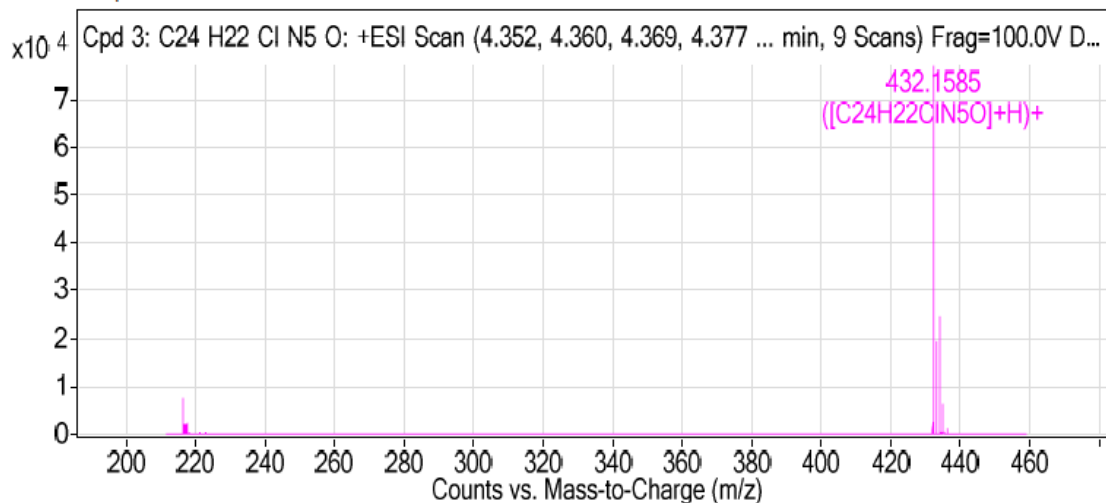

### MS Spectrum Peak List

| m/z      | Calc m/z | Diff(ppm) | z | Abund    | Formula                                            | Ion      |
|----------|----------|-----------|---|----------|----------------------------------------------------|----------|
| 216.5825 | 216.5829 | 2.06      | 2 | 7646.09  | C <sub>24</sub> H <sub>22</sub> ClN <sub>5</sub> O | (M+2H)+2 |
| 217.0847 | 217.0844 | -1.24     | 2 | 2145.11  | C <sub>24</sub> H <sub>22</sub> ClN <sub>5</sub> O | (M+2H)+2 |
| 217.581  | 217.5819 | 4.28      | 2 | 2654.04  | C <sub>24</sub> H <sub>22</sub> ClN <sub>5</sub> O | (M+2H)+2 |
| 218.0813 | 218.0831 | 8.3       | 2 | 465.74   | C <sub>24</sub> H <sub>22</sub> ClN <sub>5</sub> O | (M+2H)+2 |
| 432.1585 | 432.1586 | 0.15      | 1 | 77085.56 | C <sub>24</sub> H <sub>22</sub> ClN <sub>5</sub> O | (M+H)+   |
| 433.1616 | 433.1615 | -0.14     | 1 | 20337.61 | C <sub>24</sub> H <sub>22</sub> ClN <sub>5</sub> O | (M+H)+   |
| 434.1561 | 434.1566 | 1.07      | 1 | 24839.15 | C <sub>24</sub> H <sub>22</sub> ClN <sub>5</sub> O | (M+H)+   |
| 435.1589 | 435.1589 | 0.15      | 1 | 6283.17  | C <sub>24</sub> H <sub>22</sub> ClN <sub>5</sub> O | (M+H)+   |
| 436.1605 | 436.1616 | 2.53      | 1 | 1047.51  | C <sub>24</sub> H <sub>22</sub> ClN <sub>5</sub> O | (M+H)+   |
| 454.1398 | 454.1405 | 1.48      | 1 | 91.55    | C <sub>24</sub> H <sub>22</sub> ClN <sub>5</sub> O | (M+Na)+  |

**Compound-15b**

EI MS (70 eV):

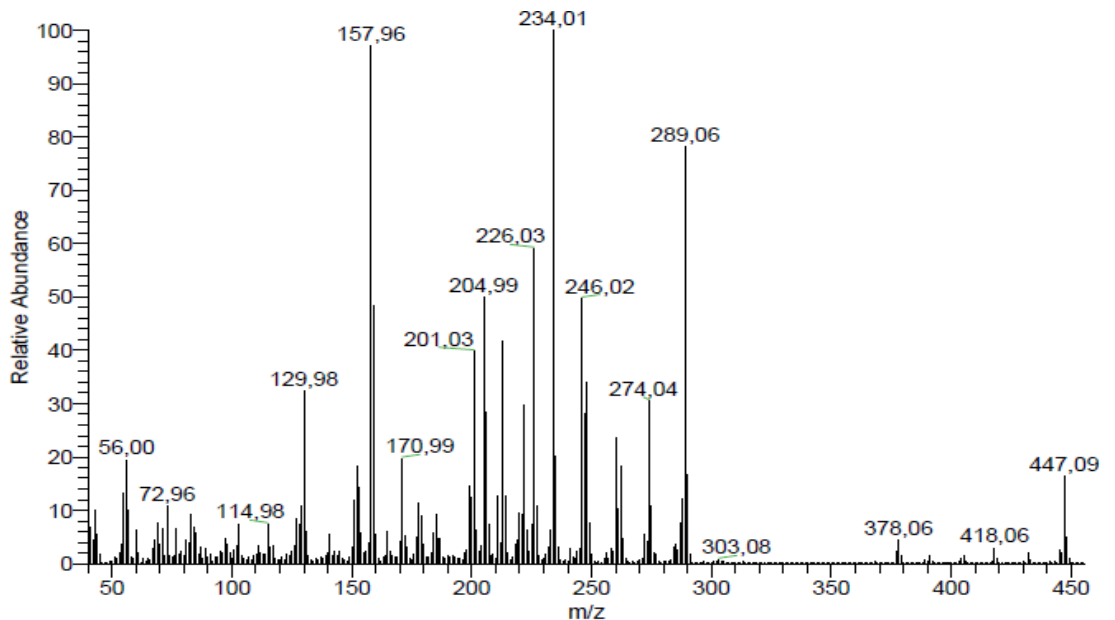

ESI-QTOF (positive ionization)

MS Zoomed Spectrum

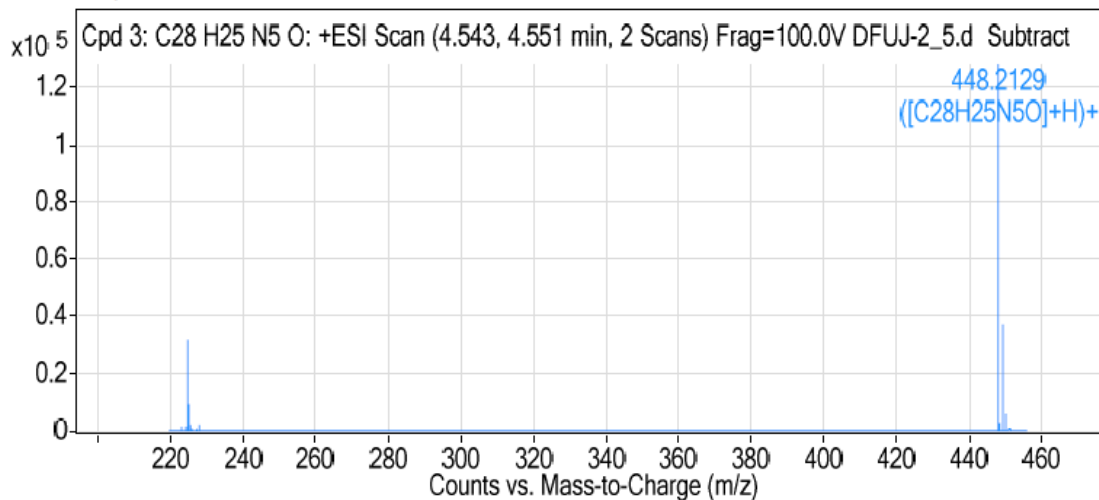

**MS Spectrum Peak List**

| <i>m/z</i> | <i>Calc m/z</i> | Diff(ppm) | <i>z</i> | Abund     | Formula                                          | Ion                  |
|------------|-----------------|-----------|----------|-----------|--------------------------------------------------|----------------------|
| 224.61     | 224.6102        | 1.18      | 2        | 31469.39  | C <sub>28</sub> H <sub>25</sub> N <sub>5</sub> O | (M+2H) <sup>2+</sup> |
| 225.1114   | 225.1117        | 1.42      | 2        | 9652.85   | C <sub>28</sub> H <sub>25</sub> N <sub>5</sub> O | (M+2H) <sup>2+</sup> |
| 225.6121   | 225.6132        | 4.81      | 2        | 1876.05   | C <sub>28</sub> H <sub>25</sub> N <sub>5</sub> O | (M+2H) <sup>2+</sup> |
| 226.1091   | 226.1147        | 24.49     | 2        | 137.28    | C <sub>28</sub> H <sub>25</sub> N <sub>5</sub> O | (M+2H) <sup>2+</sup> |
| 448.2129   | 448.2132        | 0.66      | 1        | 128534.05 | C <sub>28</sub> H <sub>25</sub> N <sub>5</sub> O | (M+H) <sup>+</sup>   |
| 449.216    | 449.2162        | 0.5       | 1        | 38207.29  | C <sub>28</sub> H <sub>25</sub> N <sub>5</sub> O | (M+H) <sup>+</sup>   |
| 450.219    | 450.2192        | 0.41      | 1        | 6056.7    | C <sub>28</sub> H <sub>25</sub> N <sub>5</sub> O | (M+H) <sup>+</sup>   |
| 451.2235   | 451.222         | -3.24     | 1        | 784.28    | C <sub>28</sub> H <sub>25</sub> N <sub>5</sub> O | (M+H) <sup>+</sup>   |

## Compound-16a

EI MS (70 eV):

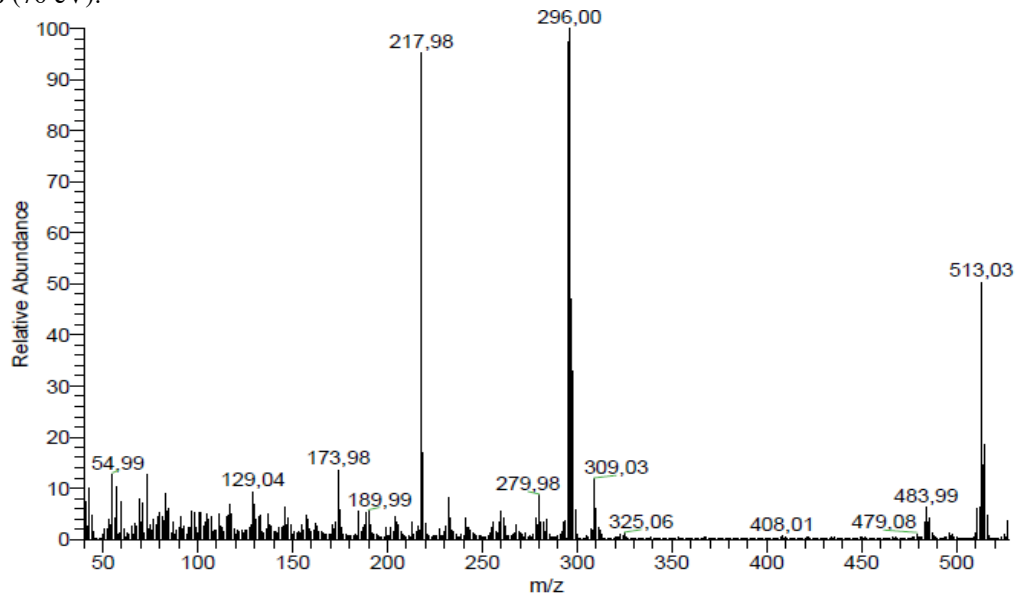

ESI-QTOF (positive ionization)

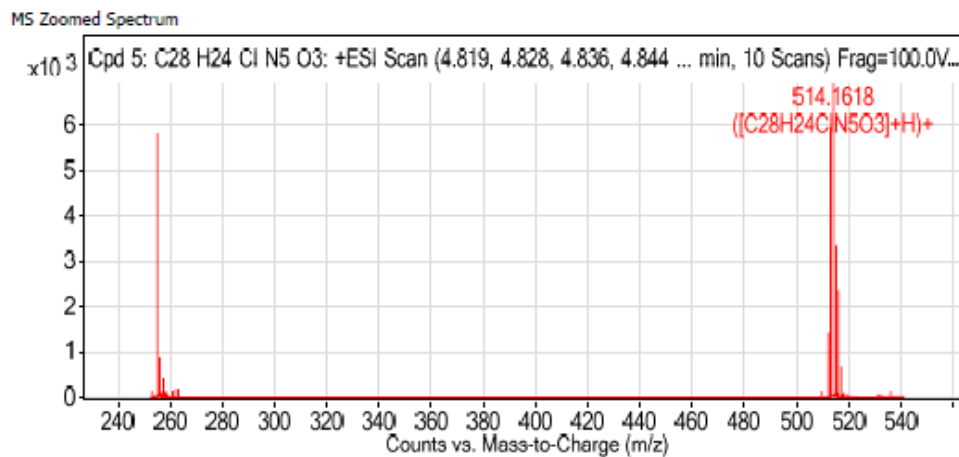

### MS Spectrum Peak List

| m/z      | Calc m/z | Diff(ppm) | z | Abund   | Formula                                                         | Ion                  |
|----------|----------|-----------|---|---------|-----------------------------------------------------------------|----------------------|
| 257.5854 | 257.5857 | 1.03      | 2 | 488.1   | C <sub>28</sub> H <sub>24</sub> ClN <sub>5</sub> O <sub>3</sub> | (M+2H) <sup>2+</sup> |
| 258.0876 | 258.0872 | -1.79     | 2 | 123.01  | C <sub>28</sub> H <sub>24</sub> ClN <sub>5</sub> O <sub>3</sub> | (M+2H) <sup>2+</sup> |
| 258.5863 | 258.5849 | -5.68     | 2 | 156.79  | C <sub>28</sub> H <sub>24</sub> ClN <sub>5</sub> O <sub>3</sub> | (M+2H) <sup>2+</sup> |
| 259.0836 | 259.086  | 9.26      | 2 | 26.1    | C <sub>28</sub> H <sub>24</sub> ClN <sub>5</sub> O <sub>3</sub> | (M+2H) <sup>2+</sup> |
| 514.1618 | 514.164  | 4.37      | 1 | 7041.11 | C <sub>28</sub> H <sub>24</sub> ClN <sub>5</sub> O <sub>3</sub> | (M+H) <sup>+</sup>   |
| 515.1587 | 515.1671 | 16.29     | 1 | 3466.86 | C <sub>28</sub> H <sub>24</sub> ClN <sub>5</sub> O <sub>3</sub> | (M+H) <sup>+</sup>   |
| 516.1605 | 516.1624 | 3.8       | 1 | 2486.46 | C <sub>28</sub> H <sub>24</sub> ClN <sub>5</sub> O <sub>3</sub> | (M+H) <sup>+</sup>   |
| 517.1629 | 517.1647 | 3.37      | 1 | 707.97  | C <sub>28</sub> H <sub>24</sub> ClN <sub>5</sub> O <sub>3</sub> | (M+H) <sup>+</sup>   |
| 518.1712 | 518.1673 | -7.71     | 1 | 44.95   | C <sub>28</sub> H <sub>24</sub> ClN <sub>5</sub> O <sub>3</sub> | (M+H) <sup>+</sup>   |
| 536.1466 | 536.146  | -1.05     | 1 | 108.57  | C <sub>28</sub> H <sub>24</sub> ClN <sub>5</sub> O <sub>3</sub> | (M+Na) <sup>+</sup>  |

## Compound-16b

EI MS (70 eV):

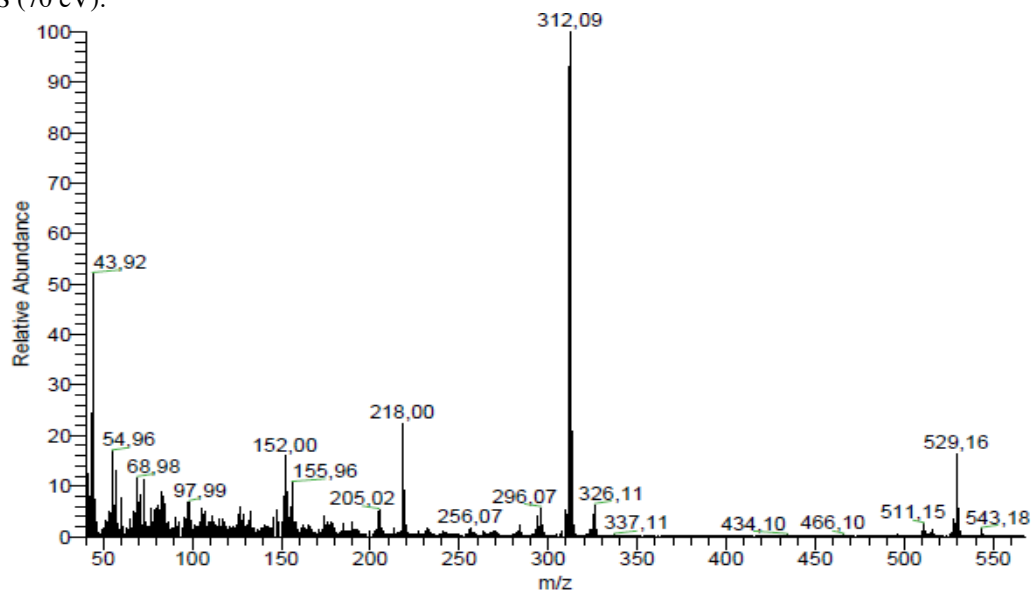

ESI-QTOF (positive ionization)

MS Zoomed Spectrum

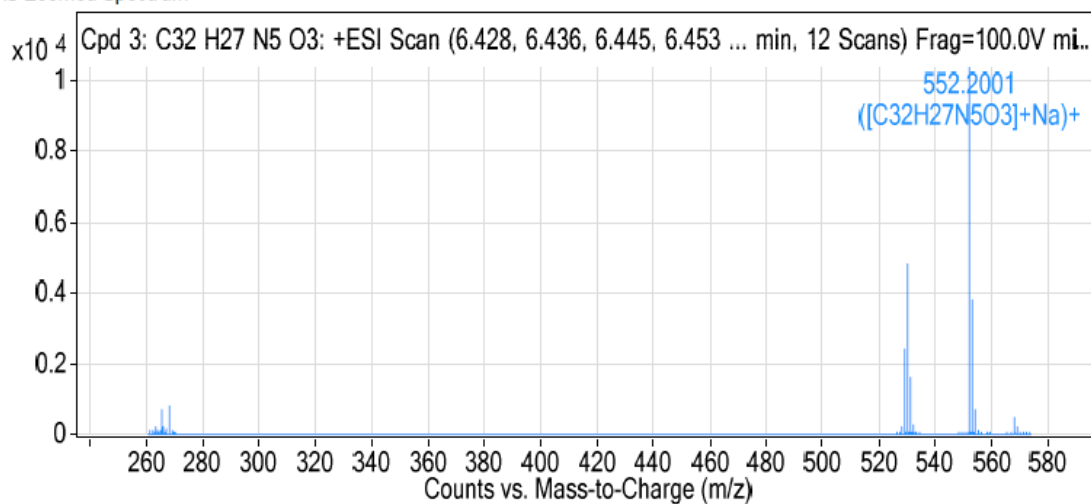

### MS Spectrum Peak List

| m/z      | Calc m/z | Diff(ppm) | z | Abund    | Formula                                                       | Ion                   |
|----------|----------|-----------|---|----------|---------------------------------------------------------------|-----------------------|
| 265.6133 | 265.613  | -1.36     | 2 | 736.64   | C <sub>32</sub> H <sub>27</sub> N <sub>5</sub> O <sub>3</sub> | (M+2H) <sup>+</sup> 2 |
| 266.1153 | 266.1145 | -3        | 2 | 226.95   | C <sub>32</sub> H <sub>27</sub> N <sub>5</sub> O <sub>3</sub> | (M+2H) <sup>+</sup> 2 |
| 530.2169 | 530.2187 | 3.32      | 1 | 4940     | C <sub>32</sub> H <sub>27</sub> N <sub>5</sub> O <sub>3</sub> | (M+H) <sup>+</sup>    |
| 531.2209 | 531.2217 | 1.65      | 1 | 1682.09  | C <sub>32</sub> H <sub>27</sub> N <sub>5</sub> O <sub>3</sub> | (M+H) <sup>+</sup>    |
| 532.2216 | 532.2246 | 5.64      | 1 | 264.44   | C <sub>32</sub> H <sub>27</sub> N <sub>5</sub> O <sub>3</sub> | (M+H) <sup>+</sup>    |
| 552.2001 | 552.2006 | 0.89      | 1 | 10708.76 | C <sub>32</sub> H <sub>27</sub> N <sub>5</sub> O <sub>3</sub> | (M+Na) <sup>+</sup>   |
| 553.2033 | 553.2037 | 0.76      | 1 | 3947.83  | C <sub>32</sub> H <sub>27</sub> N <sub>5</sub> O <sub>3</sub> | (M+Na) <sup>+</sup>   |
| 554.2054 | 554.2066 | 2.14      | 1 | 731.08   | C <sub>32</sub> H <sub>27</sub> N <sub>5</sub> O <sub>3</sub> | (M+Na) <sup>+</sup>   |
| 568.1728 | 568.1745 | 3.1       | 1 | 563.15   | C <sub>32</sub> H <sub>27</sub> N <sub>5</sub> O <sub>3</sub> | (M+K) <sup>+</sup>    |
| 569.1781 | 569.1776 | -0.83     | 1 | 198.83   | C <sub>32</sub> H <sub>27</sub> N <sub>5</sub> O <sub>3</sub> | (M+K) <sup>+</sup>    |

## Compound-17a

EI MS (70 eV):

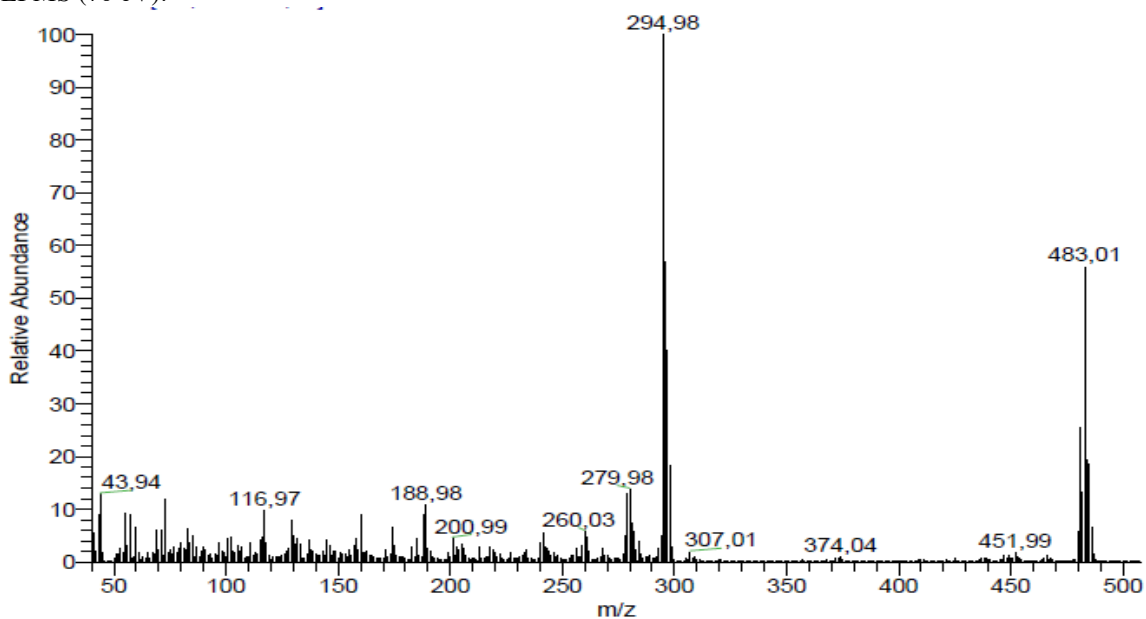

ESI-QTOF (positive ionization)

MS Zoomed Spectrum

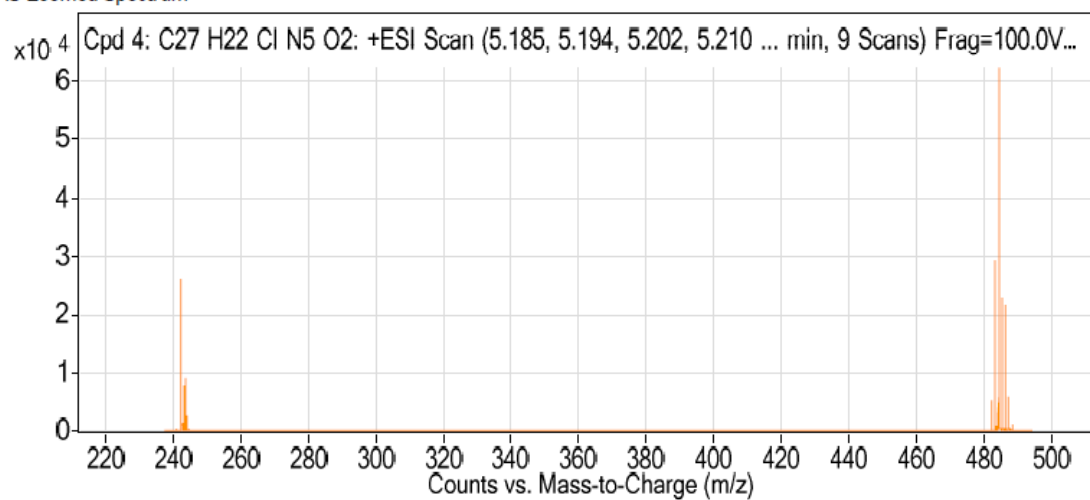

### MS Spectrum Peak List

| m/z      | Calc m/z | Diff(ppm) | z | Abund    | Formula                                                         | Ion      |
|----------|----------|-----------|---|----------|-----------------------------------------------------------------|----------|
| 242.58   | 242.5804 | 1.63      | 2 | 26186.62 | C <sub>27</sub> H <sub>22</sub> ClN <sub>5</sub> O <sub>2</sub> | (M+2H)+2 |
| 243.0817 | 243.0819 | 0.67      | 2 | 7805.67  | C <sub>27</sub> H <sub>22</sub> ClN <sub>5</sub> O <sub>2</sub> | (M+2H)+2 |
| 243.5789 | 243.5795 | 2.35      | 2 | 9478.5   | C <sub>27</sub> H <sub>22</sub> ClN <sub>5</sub> O <sub>2</sub> | (M+2H)+2 |
| 244.0799 | 244.0806 | 2.95      | 2 | 2537.79  | C <sub>27</sub> H <sub>22</sub> ClN <sub>5</sub> O <sub>2</sub> | (M+2H)+2 |
| 244.5826 | 244.582  | -2.39     | 2 | 494.36   | C <sub>27</sub> H <sub>22</sub> ClN <sub>5</sub> O <sub>2</sub> | (M+2H)+2 |
| 484.1522 | 484.1535 | 2.71      | 1 | 63651.75 | C <sub>27</sub> H <sub>22</sub> ClN <sub>5</sub> O <sub>2</sub> | (M+H)+   |
| 485.1517 | 485.1565 | 9.81      | 1 | 23329.83 | C <sub>27</sub> H <sub>22</sub> ClN <sub>5</sub> O <sub>2</sub> | (M+H)+   |
| 486.1506 | 486.1518 | 2.43      | 1 | 21912.67 | C <sub>27</sub> H <sub>22</sub> ClN <sub>5</sub> O <sub>2</sub> | (M+H)+   |
| 487.153  | 487.154  | 2.05      | 1 | 5904.65  | C <sub>27</sub> H <sub>22</sub> ClN <sub>5</sub> O <sub>2</sub> | (M+H)+   |
| 488.1556 | 488.1567 | 2.13      | 1 | 977.71   | C <sub>27</sub> H <sub>22</sub> ClN <sub>5</sub> O <sub>2</sub> | (M+H)+   |

## Compound-17b

EI MS (70 eV):

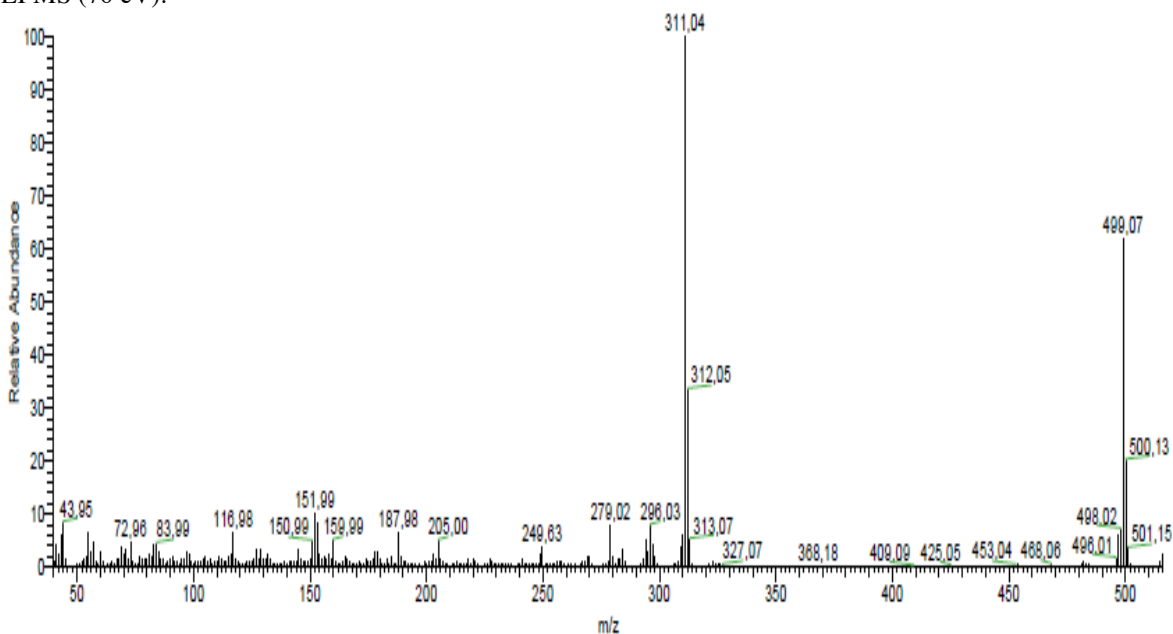

ESI-QTOF (positive ionization)

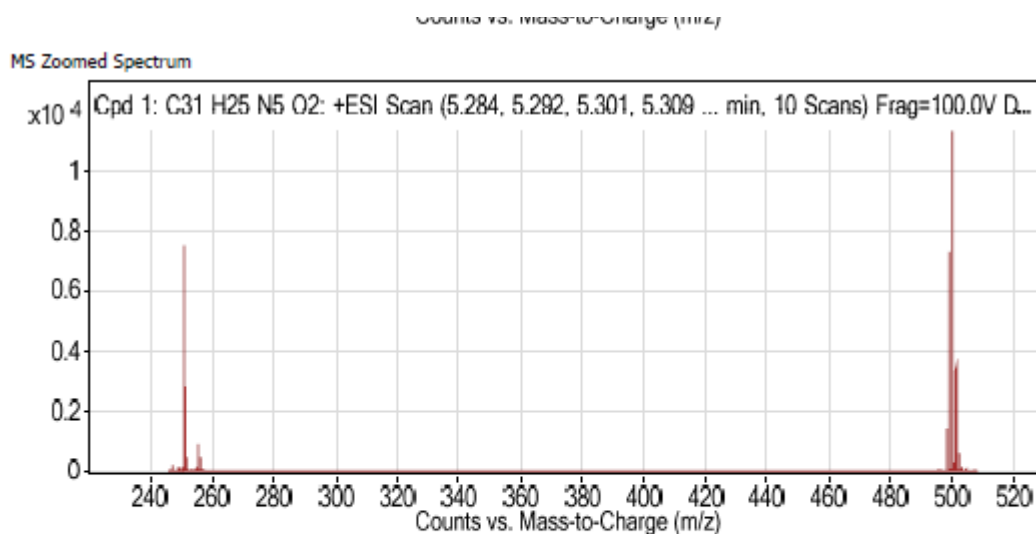

**MS Spectrum Peak List**

| m/z      | Calc m/z | Diff(ppm) | z | Abund    | Formula    | Ion      |
|----------|----------|-----------|---|----------|------------|----------|
| 250.6074 | 250.6077 | 1.22      | 2 | 7619.07  | C31H25N5O2 | (M+2H)+2 |
| 251.1097 | 251.1092 | -1.73     | 2 | 2814.04  | C31H25N5O2 | (M+2H)+2 |
| 251.6102 | 251.6107 | 2.09      | 2 | 544.7    | C31H25N5O2 | (M+2H)+2 |
| 252.1218 | 252.1121 | -38.4     | 2 | 45.46    | C31H25N5O2 | (M+2H)+2 |
| 500.2065 | 500.2081 | 3.25      | 1 | 11325.85 | C31H25N5O2 | (M+H)+   |
| 501.2104 | 501.2112 | 1.54      | 1 | 3617.13  | C31H25N5O2 | (M+H)+   |
| 502.214  | 502.2141 | 0.19      | 1 | 679.17   | C31H25N5O2 | (M+H)+   |

Compound-18a

EI MS (70 eV):

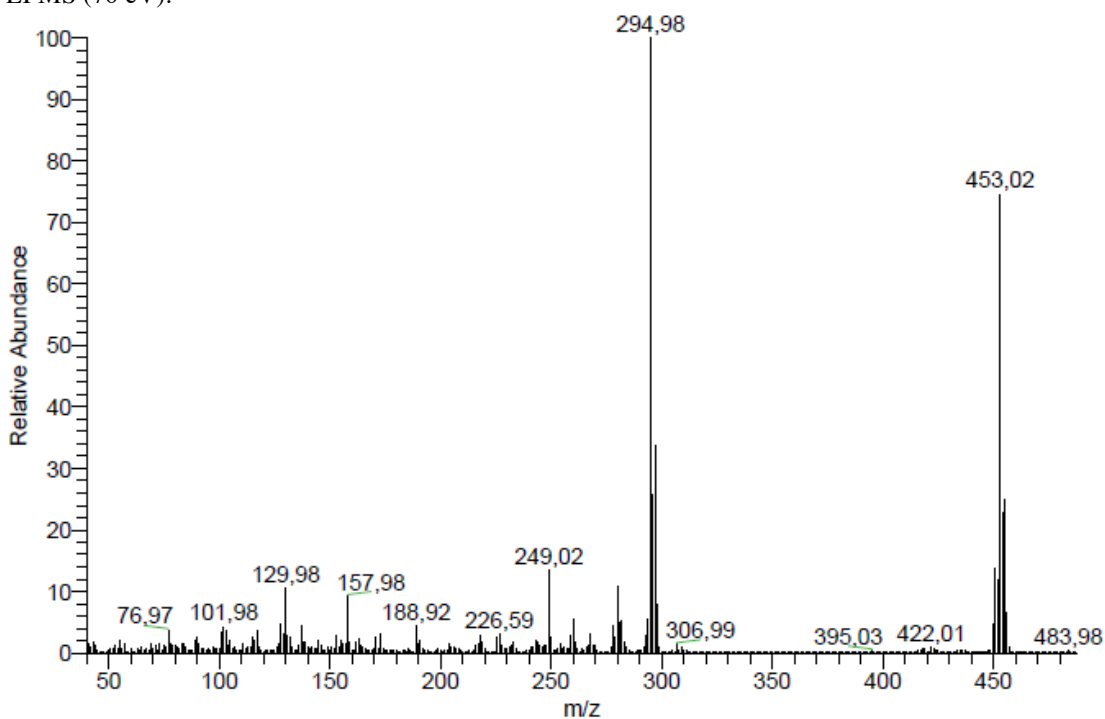

ESI-QTOF (positive ionization)

MS Zoomed Spectrum

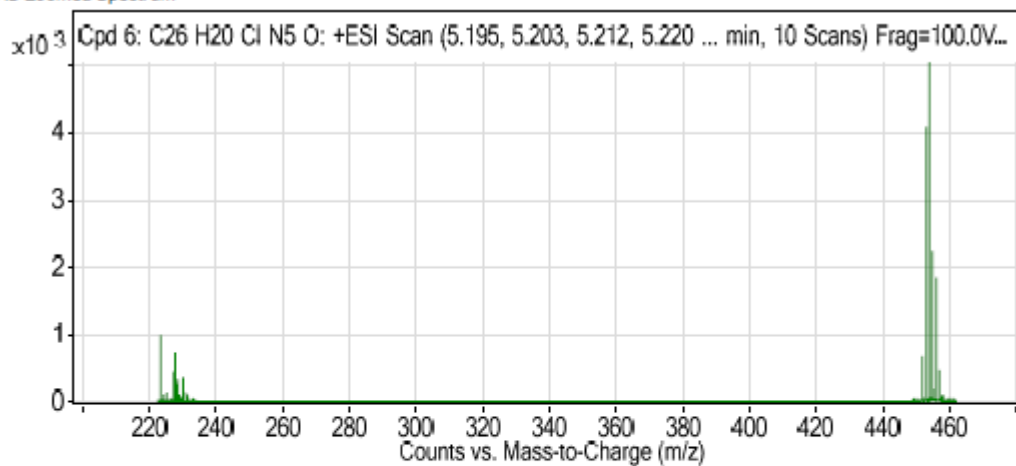

MS Spectrum Peak List

| m/z      | Calc m/z | Diff(ppm) | z | Abund   | Formula                                            | Ion      |
|----------|----------|-----------|---|---------|----------------------------------------------------|----------|
| 227.5748 | 227.5751 | 1.13      | 2 | 863.57  | C <sub>26</sub> H <sub>20</sub> ClN <sub>5</sub> O | (M+2H)+2 |
| 228.0771 | 228.0766 | -2.22     | 2 | 271.41  | C <sub>26</sub> H <sub>20</sub> ClN <sub>5</sub> O | (M+2H)+2 |
| 228.5732 | 228.5742 | 4.26      | 2 | 383.04  | C <sub>26</sub> H <sub>20</sub> ClN <sub>5</sub> O | (M+2H)+2 |
| 229.0781 | 229.0753 | -12.31    | 2 | 103.67  | C <sub>26</sub> H <sub>20</sub> ClN <sub>5</sub> O | (M+2H)+2 |
| 454.1412 | 454.1429 | 3.77      | 1 | 5046.45 | C <sub>26</sub> H <sub>20</sub> ClN <sub>5</sub> O | (M+H)+   |
| 455.1391 | 455.1459 | 15.03     | 1 | 2342.88 | C <sub>26</sub> H <sub>20</sub> ClN <sub>5</sub> O | (M+H)+   |
| 456.1391 | 456.1411 | 4.45      | 1 | 1917.91 | C <sub>26</sub> H <sub>20</sub> ClN <sub>5</sub> O | (M+H)+   |
| 457.1422 | 457.1434 | 2.63      | 1 | 539.57  | C <sub>26</sub> H <sub>20</sub> ClN <sub>5</sub> O | (M+H)+   |

Compound-18b



EI MS (70 eV):

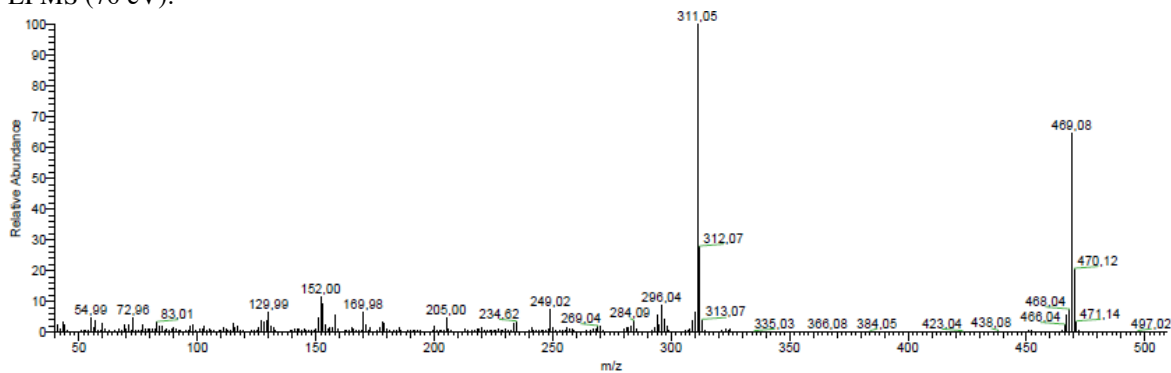

ESI-QTOF (positive ionization)

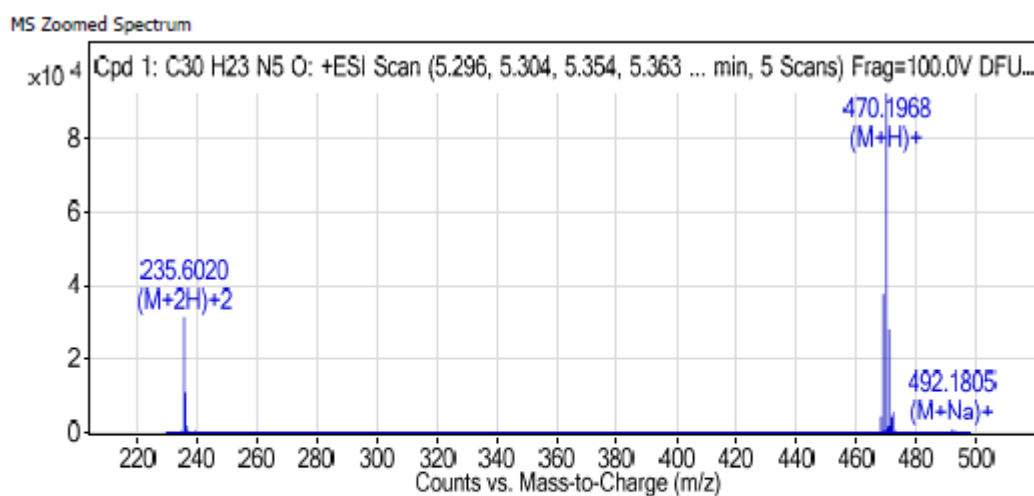

**MS Spectrum Peak List**

| m/z      | Calc m/z | Diff(ppm) | z | Abund    | Ion      |
|----------|----------|-----------|---|----------|----------|
| 234.5943 | 234.5946 | 1.07      | 2 | 363.33   | M+2      |
| 235.602  | 235.6024 | 1.64      | 2 | 31448.77 | (M+2H)+2 |
| 236.1036 | 236.1039 | 1.19      | 2 | 11158.63 | (M+2H)+2 |
| 236.6047 | 236.6054 | 2.99      | 2 | 2063.11  | (M+2H)+2 |
| 470.1968 | 470.1975 | 1.61      | 1 | 92411.3  | (M+H)+   |
| 471.2002 | 471.2006 | 0.82      | 1 | 28401.02 | (M+H)+   |
| 472.2033 | 472.2036 | 0.54      | 1 | 4631.83  | (M+H)+   |
| 473.206  | 473.2065 | 0.9       | 1 | 597.6    | (M+H)+   |
| 492.1805 | 492.1795 | -2.05     | 1 | 1141.9   | (M+Na)+  |
| 493.1834 | 493.1825 | -1.69     | 1 | 485.93   | (M+Na)+  |

**Compound-19b**

EI MS (70 eV):

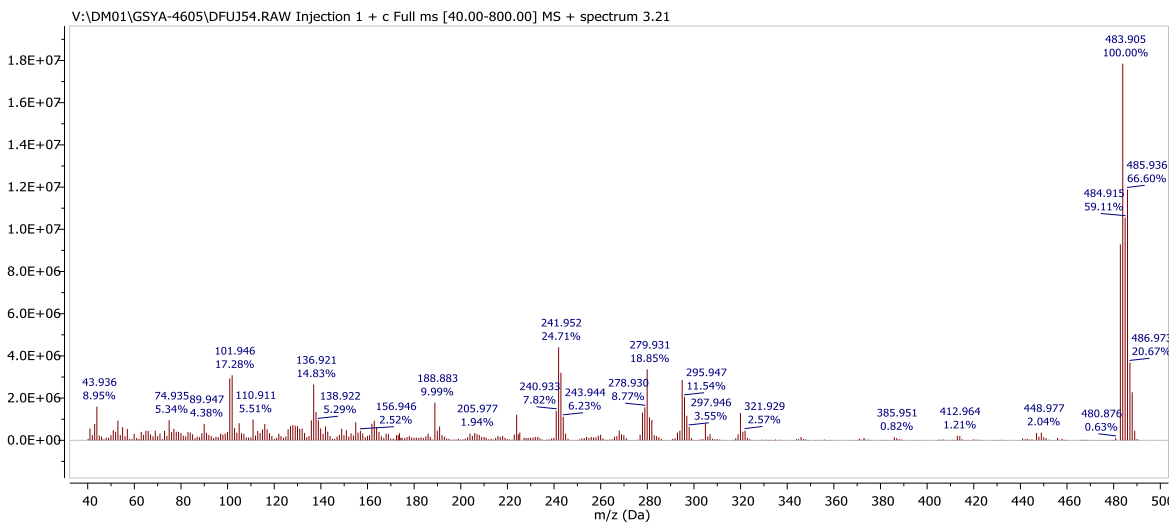

ESI-QTOF (positive ionization)

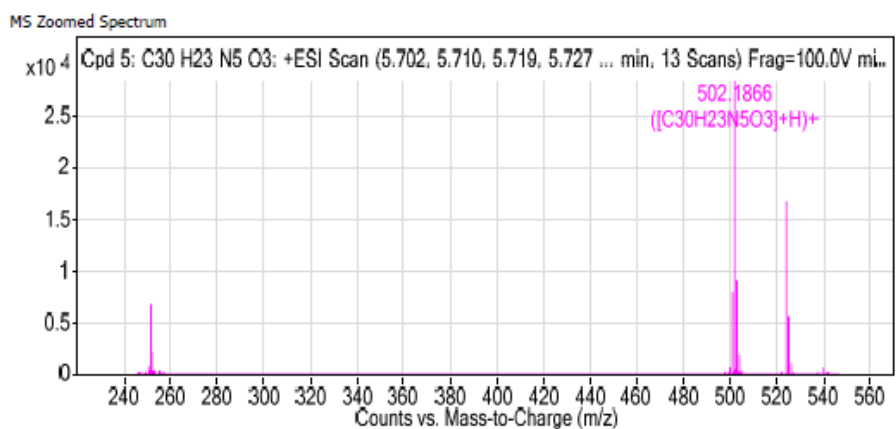

MS Spectrum Peak List

| m/z      | Calc m/z | Diff(ppm) | z | Abund    | Formula    | Ion      |
|----------|----------|-----------|---|----------|------------|----------|
| 250.5893 | 250.5895 | 0.91      | 2 | 692.13   | C30H23N5O3 | M+2      |
| 251.5972 | 251.5973 | 0.31      | 2 | 682.78   | C30H23N5O3 | (M+2H)+2 |
| 252.0989 | 252.0988 | -0.37     | 2 | 2267.47  | C30H23N5O3 | (M+2H)+2 |
| 502.1866 | 502.1874 | 1.45      | 1 | 28737.94 | C30H23N5O3 | (M+H)+   |
| 503.1897 | 503.1904 | 1.38      | 1 | 9412.55  | C30H23N5O3 | (M+H)+   |
| 504.1921 | 504.1933 | 2.42      | 1 | 1859.4   | C30H23N5O3 | (M+H)+   |
| 524.169  | 524.1693 | 0.6       | 1 | 16903.03 | C30H23N5O3 | (M+Na)+  |
| 525.172  | 525.1724 | 0.67      | 1 | 5703.55  | C30H23N5O3 | (M+Na)+  |
| 526.1744 | 526.1752 | 1.55      | 1 | 1078.7   | C30H23N5O3 | (M+Na)+  |
| 540.143  | 540.1432 | 0.37      | 1 | 684.74   | C30H23N5O3 | (M+K)+   |
